# Supplementary material for: Zirconocene dichloride catalysed one-pot synthesis of pyrroles through nitroalkene-enamine assembly
Source: Royal Society of Chemistry journal article supplement (doi:10.1039/c4ra09873k), 2014-12-10

**Zirconocene dichloride Catalysed One Pot  
Synthesis of Pyrroles through Nitroalkene-Enamine Assembly**

**Sandeep Goyal, Jatinkumar K. Patel, Mukesh Gangar, Kapil Kumar and Vipin A. Nair\***

**Supporting Information**

| <b>Contents</b>             | <b>Pages</b> |
|-----------------------------|--------------|
| <b>Copies of IR Spectra</b> | <b>2-23</b>  |

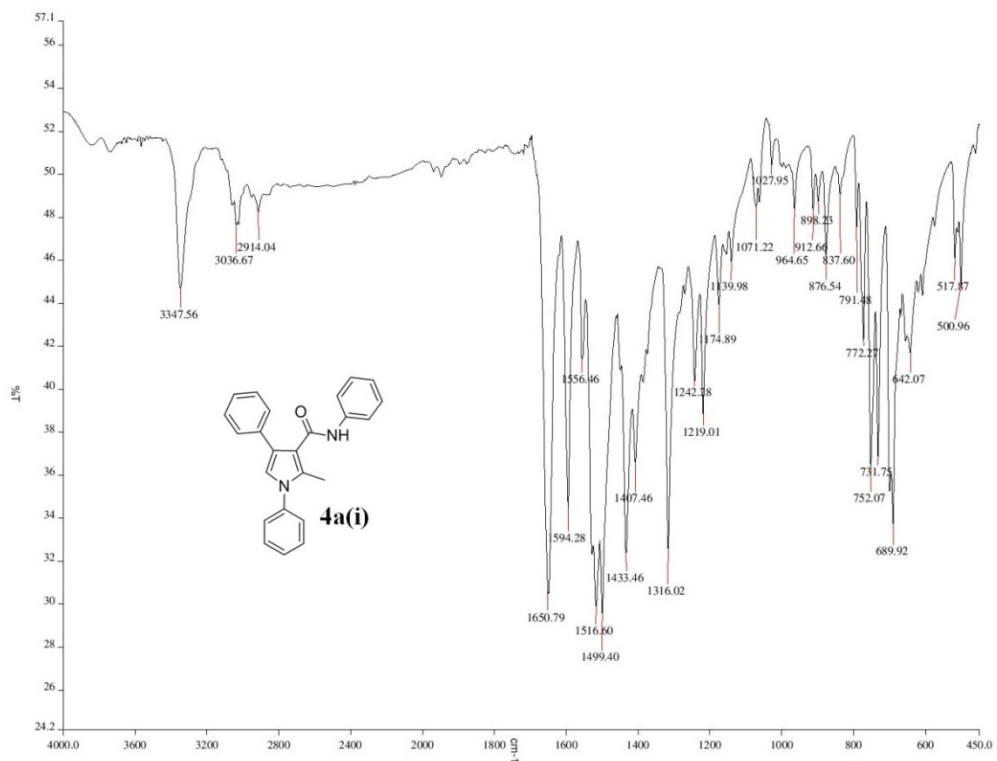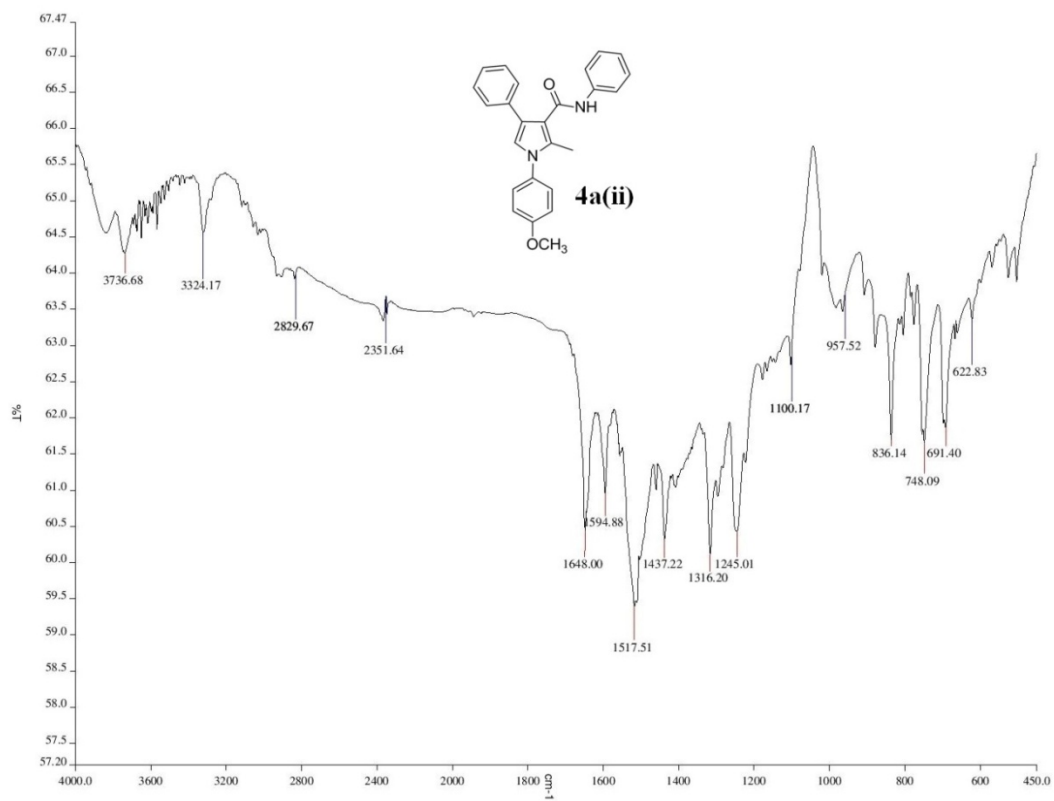

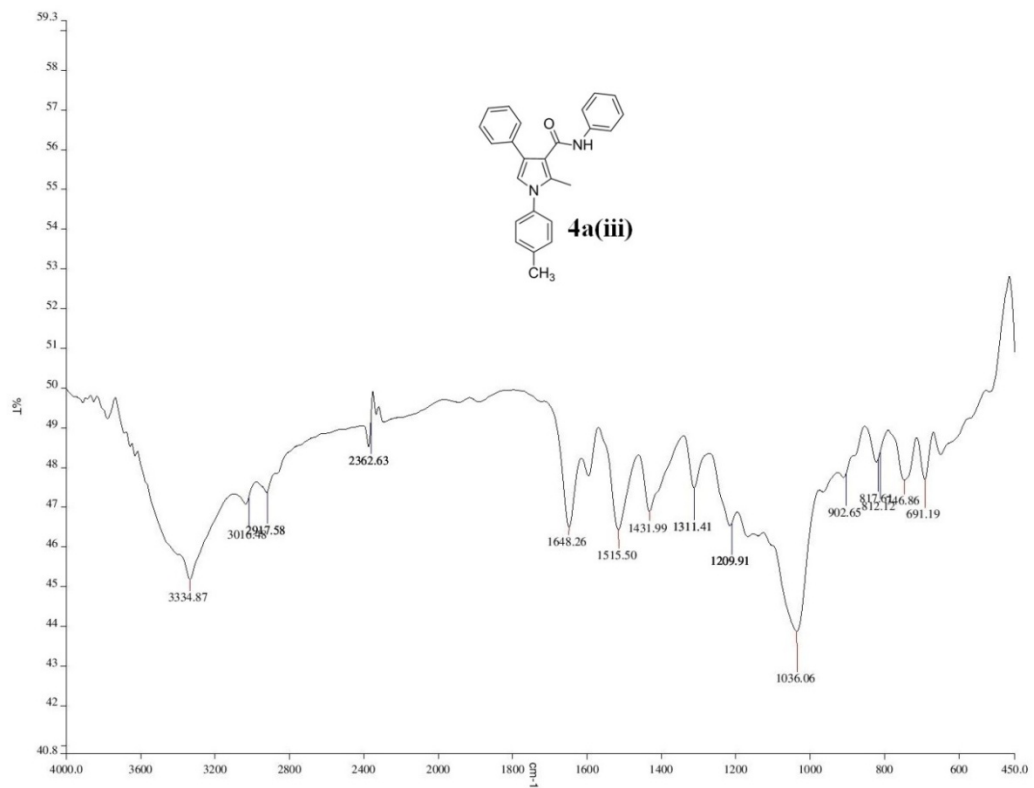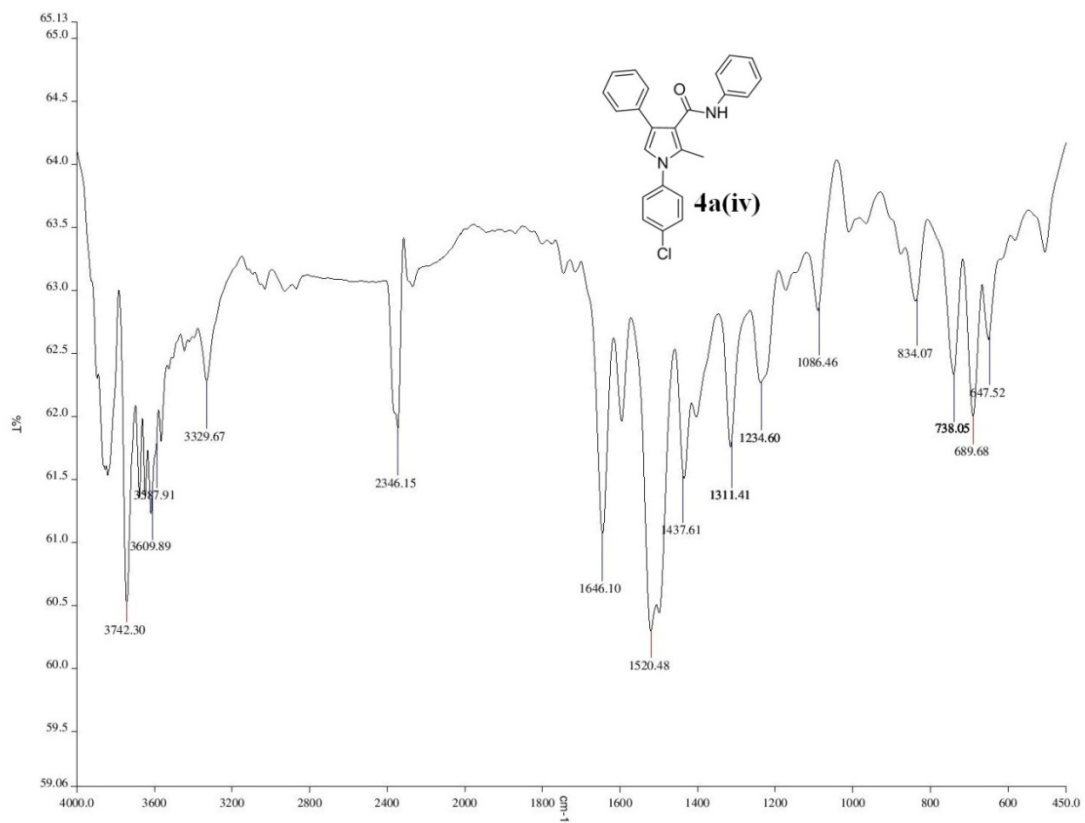

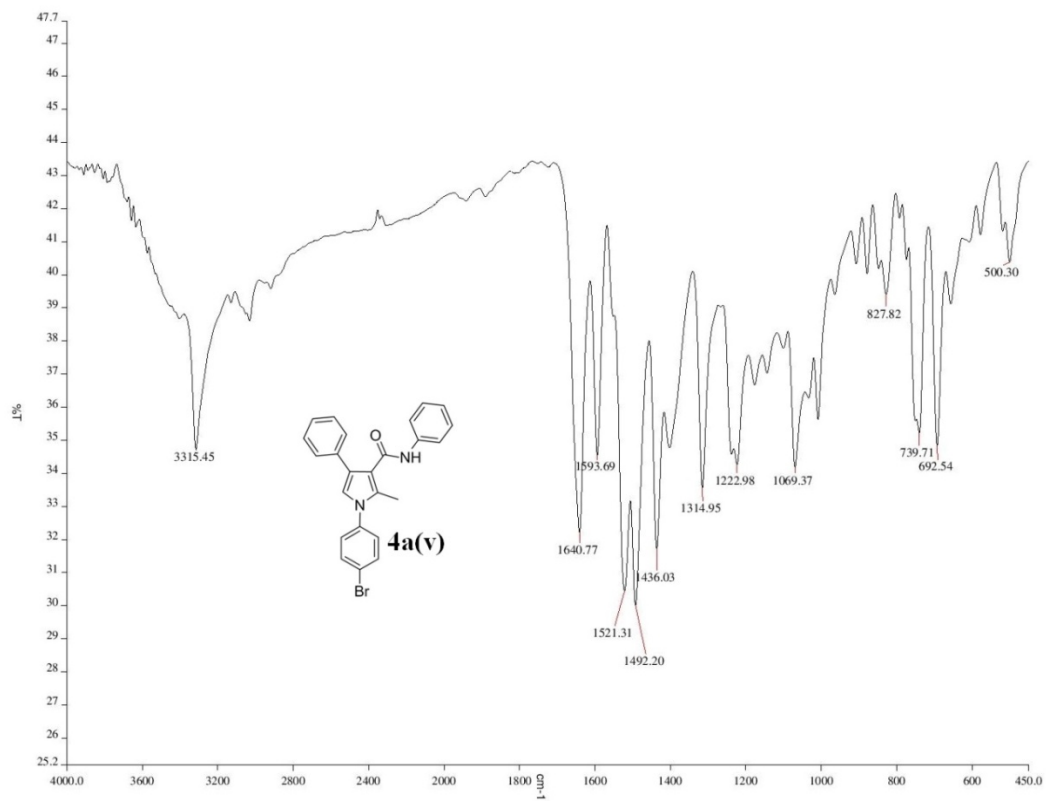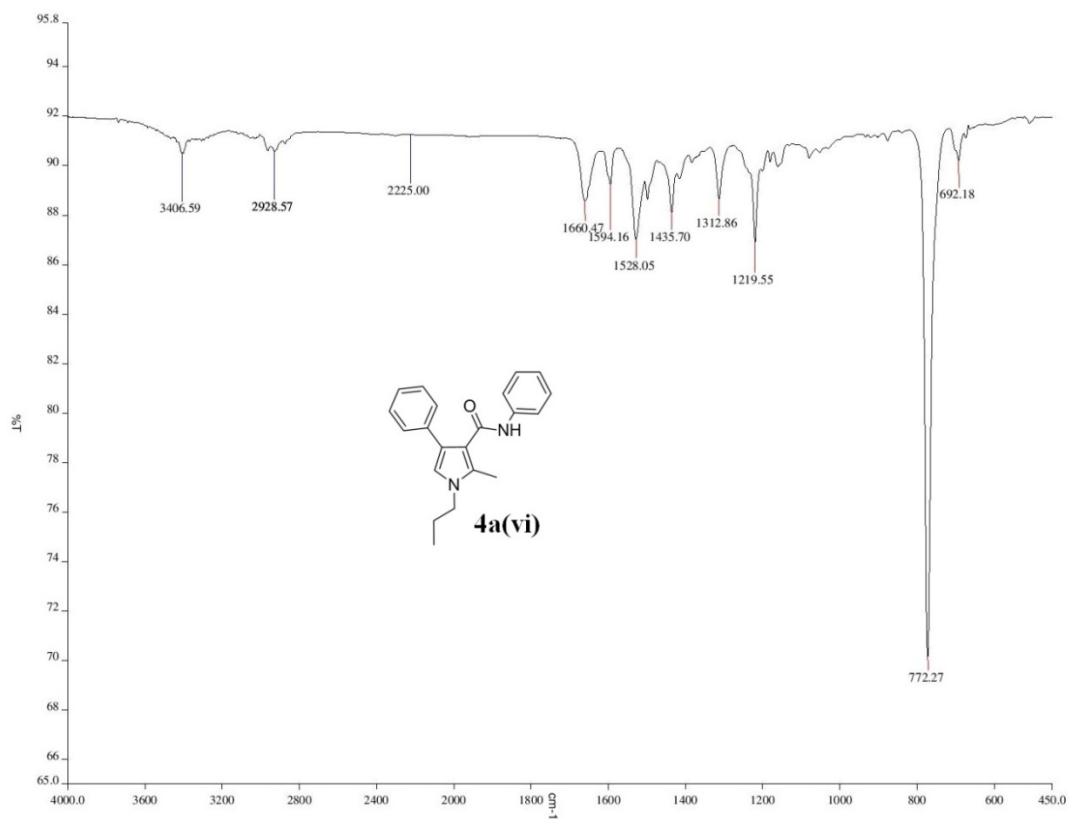

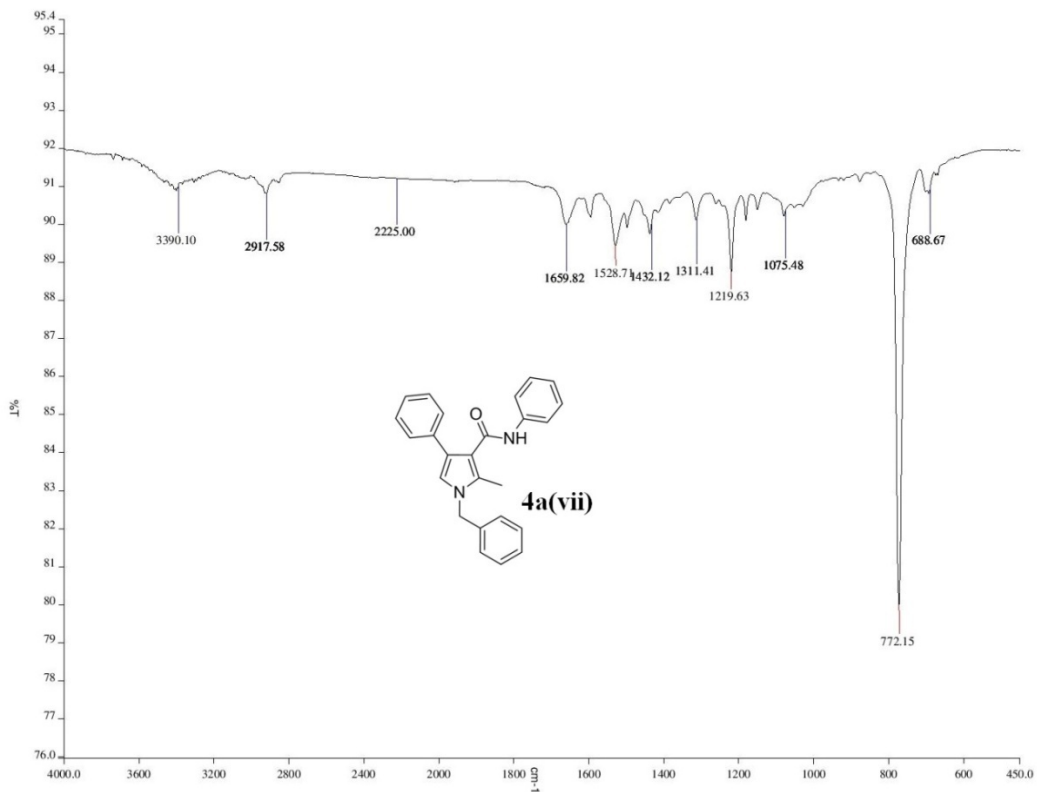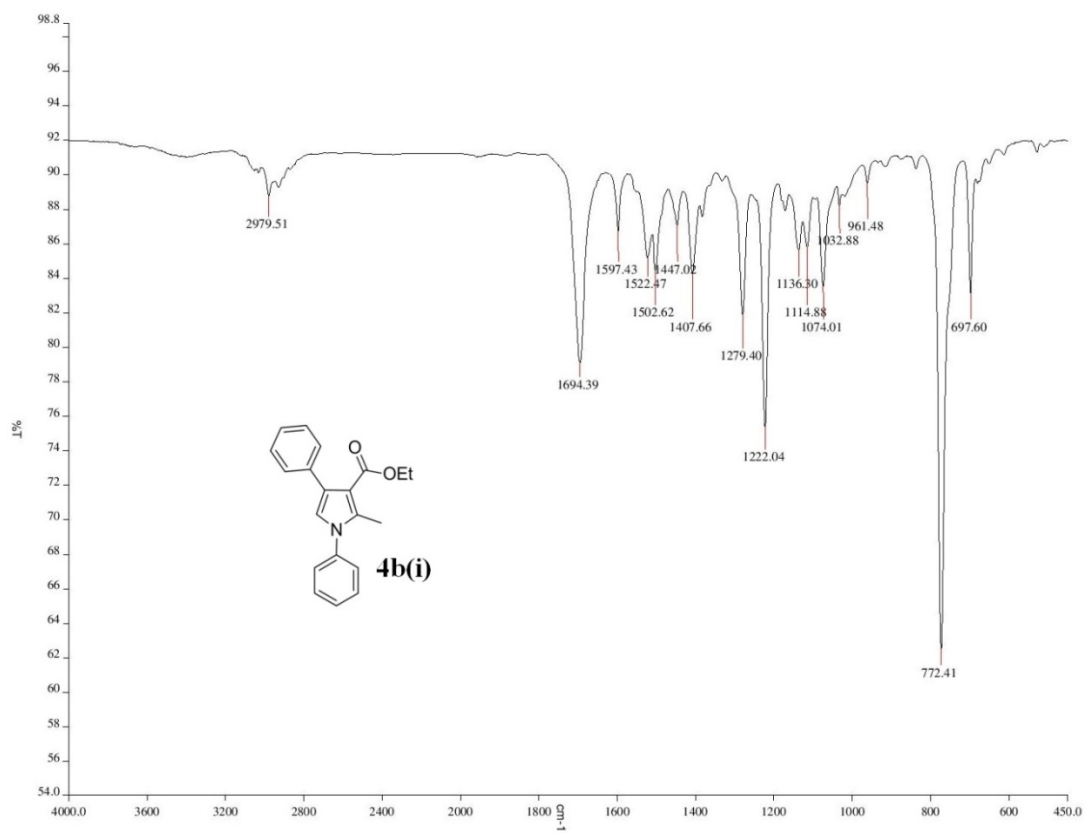

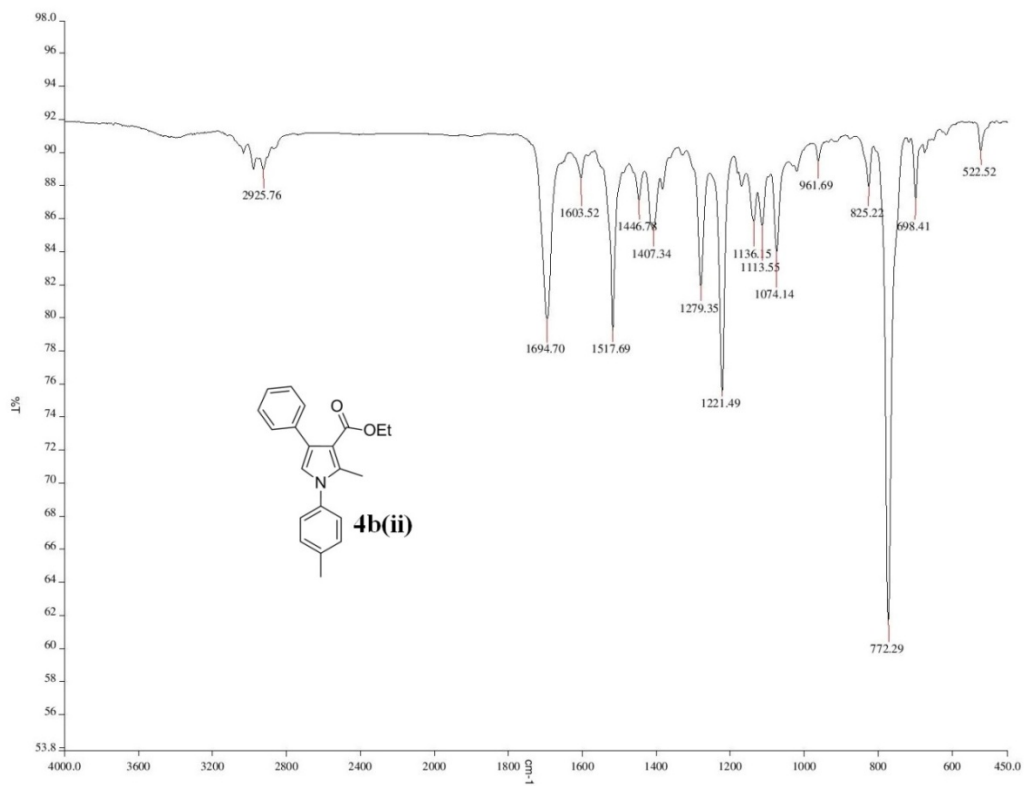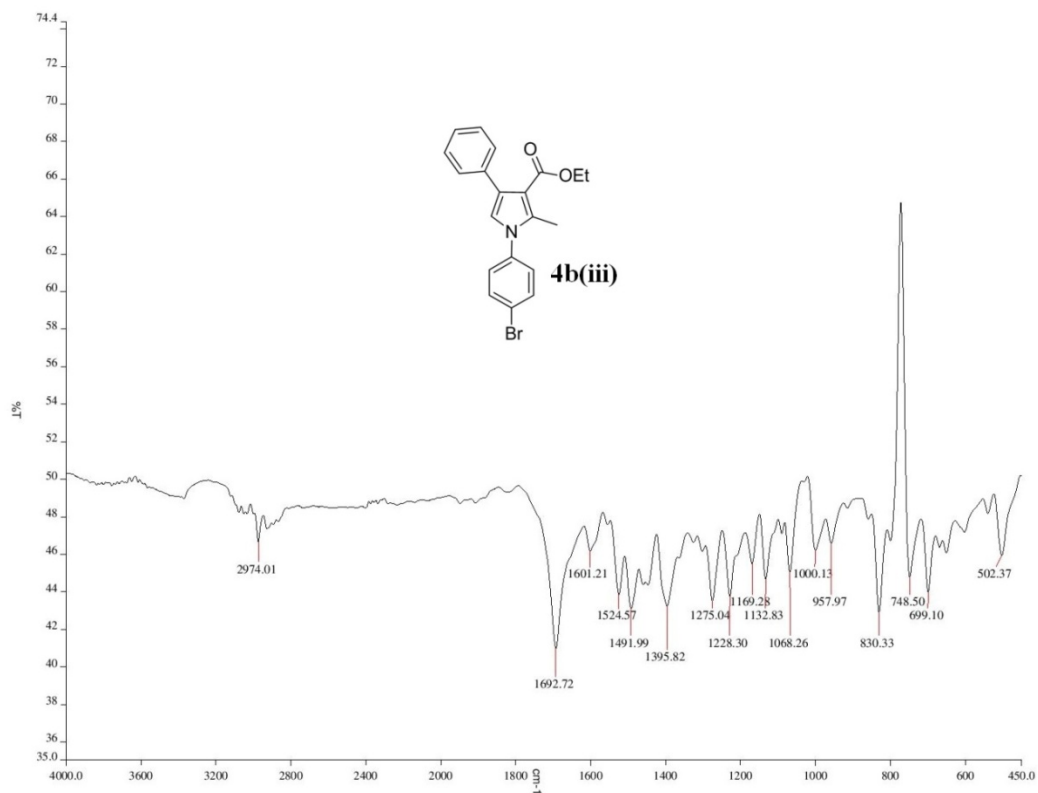

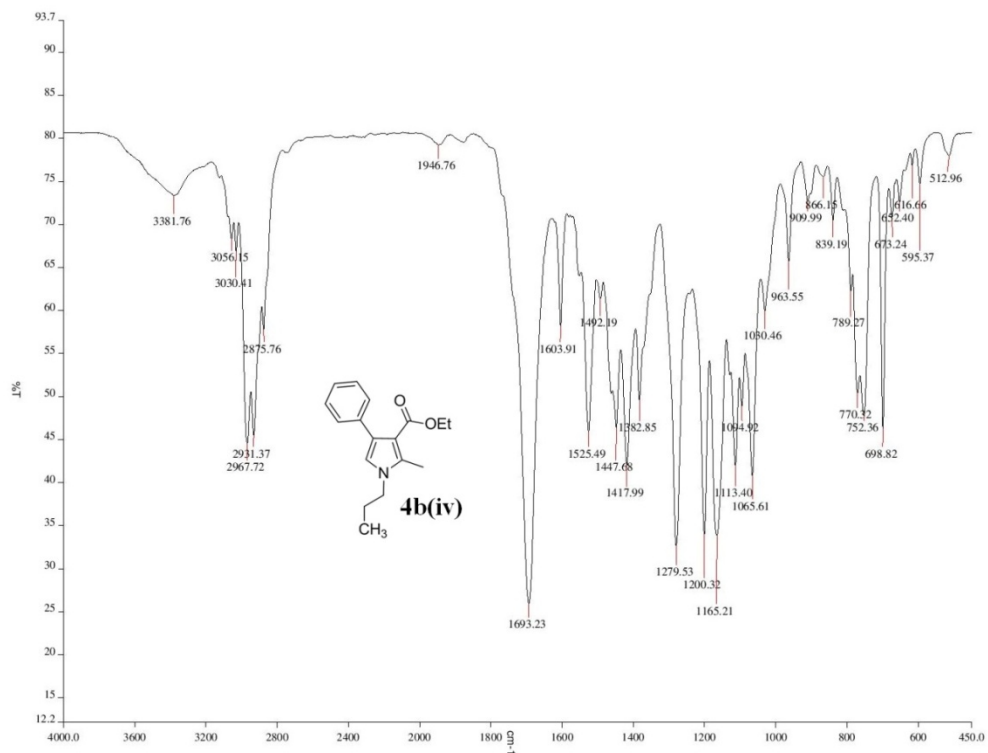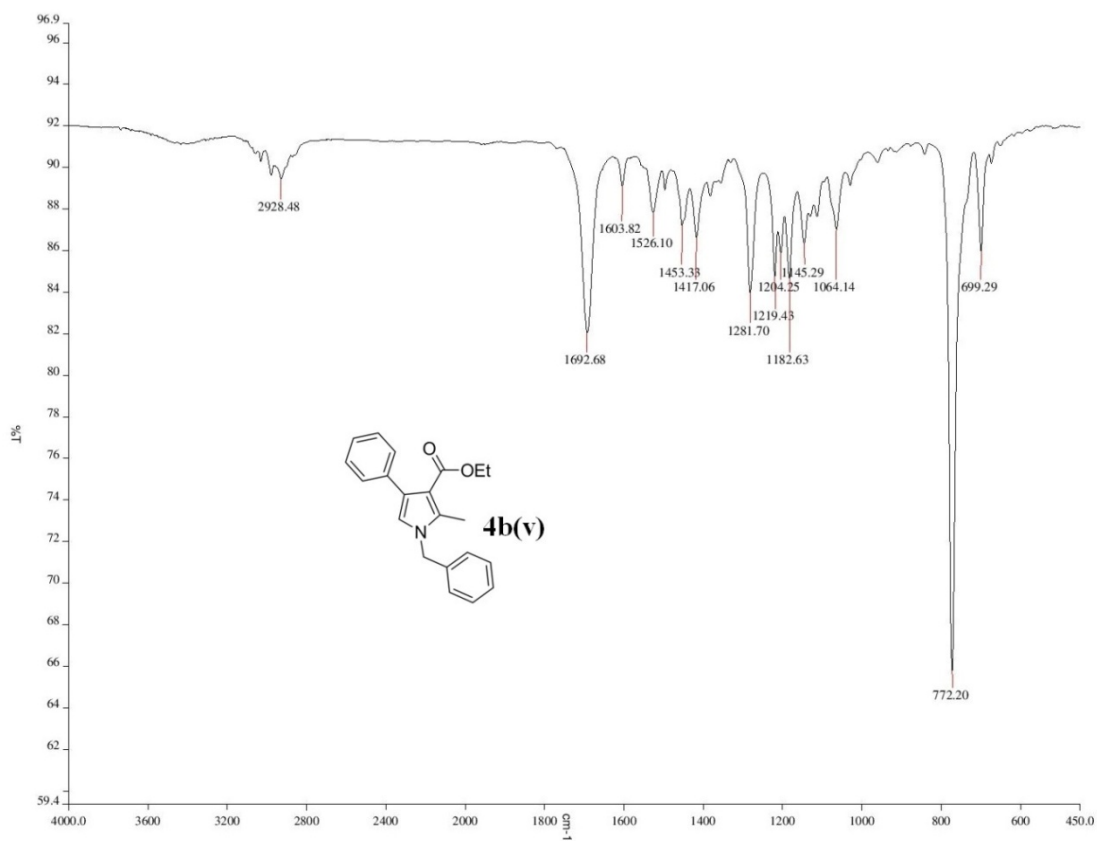

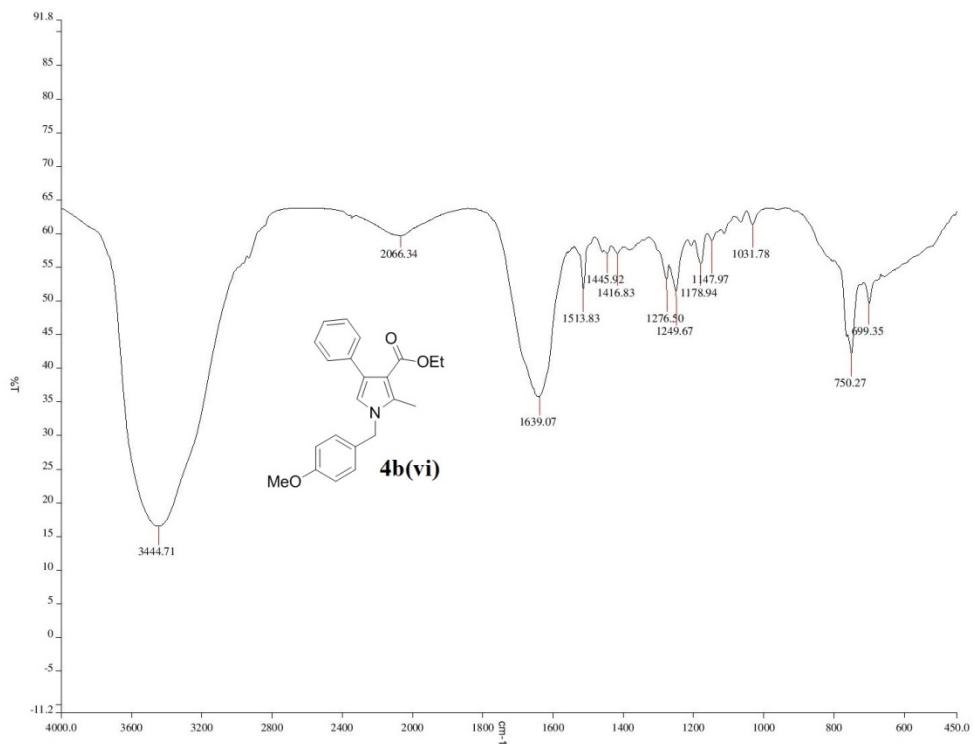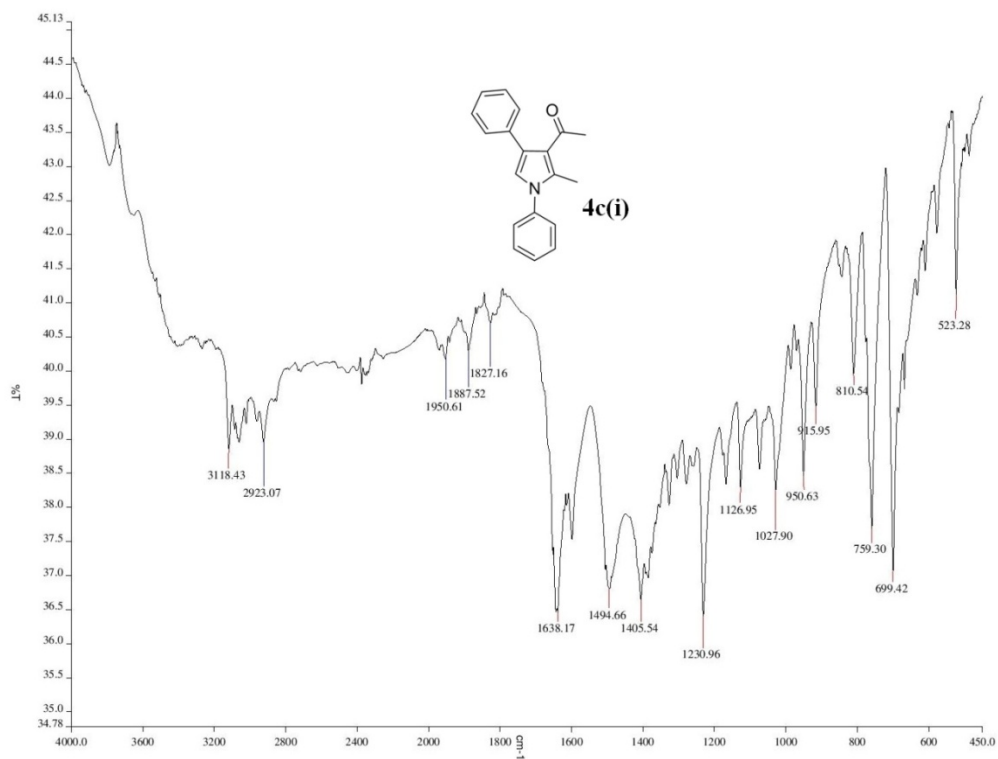



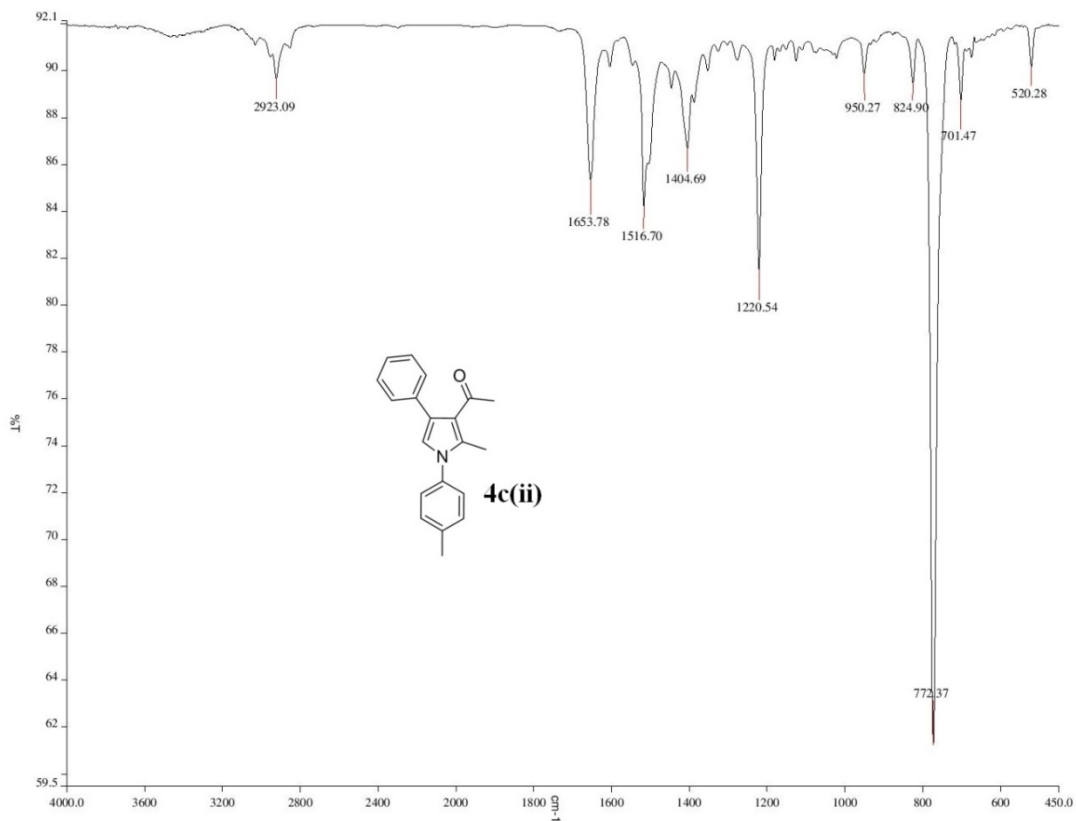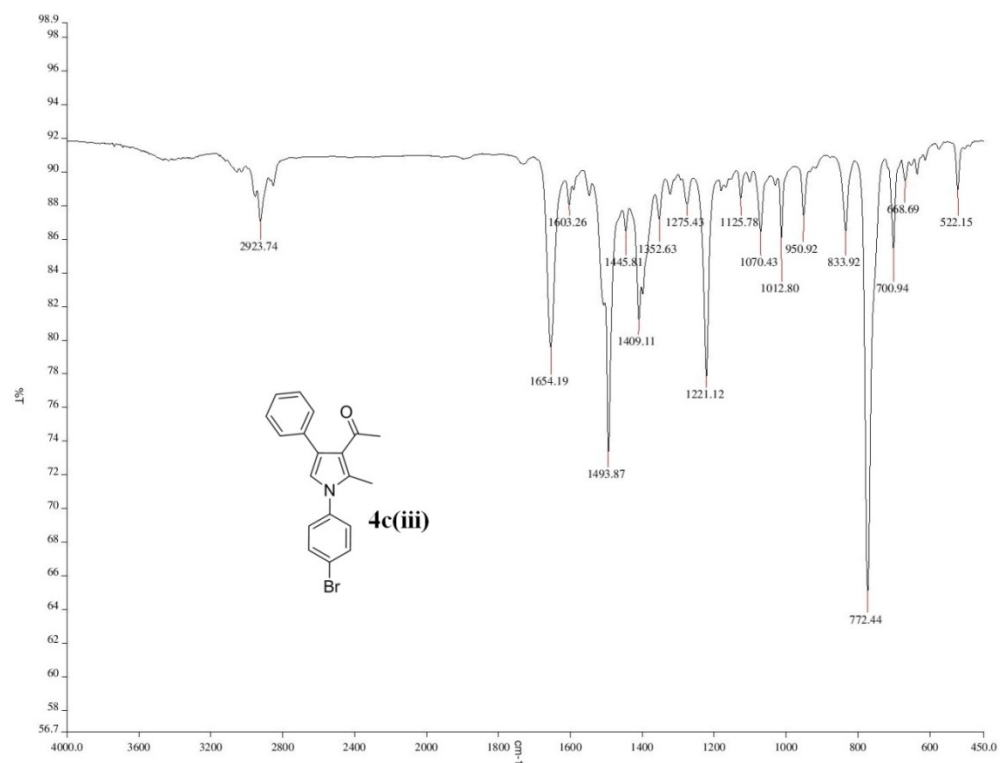

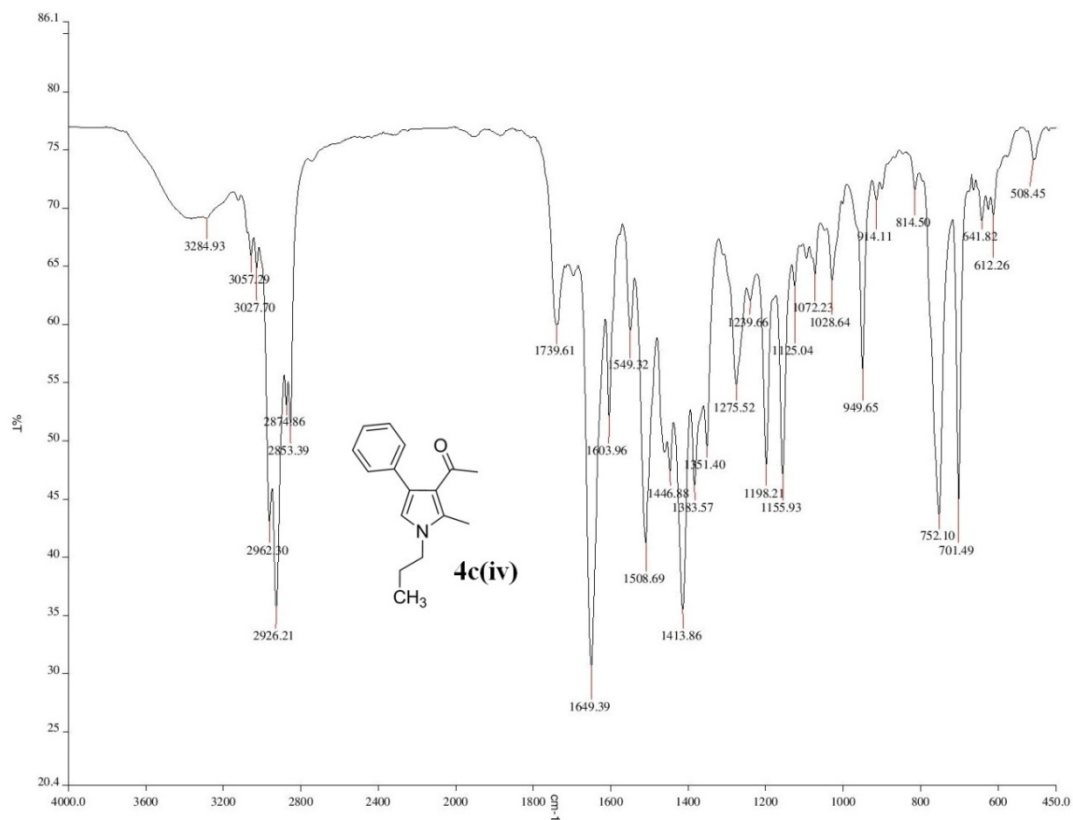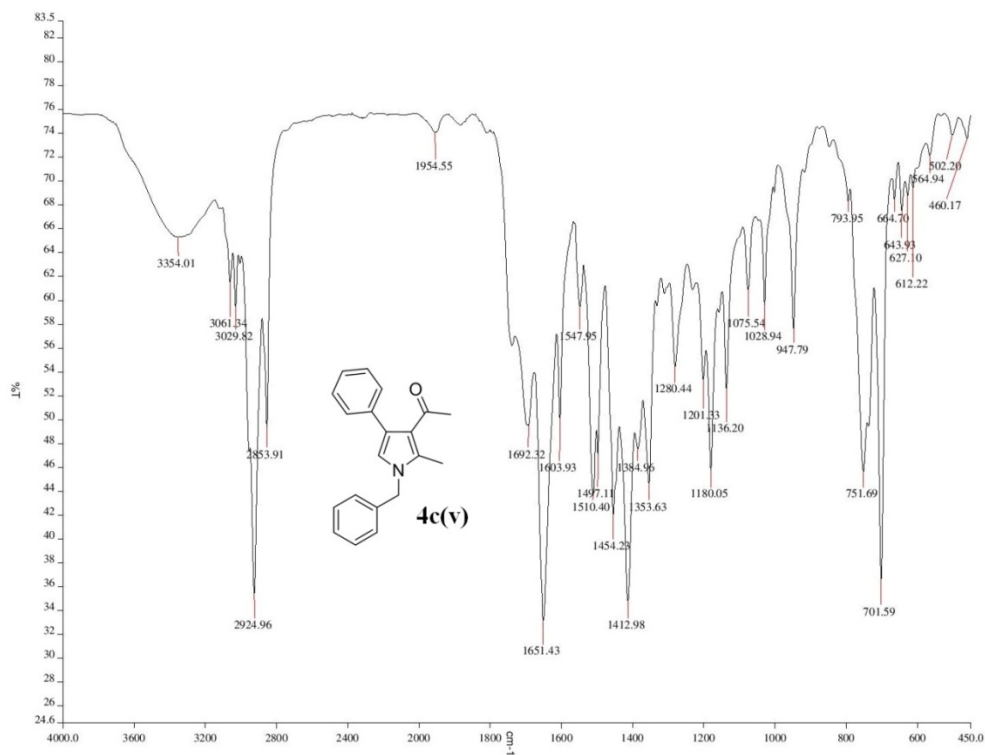

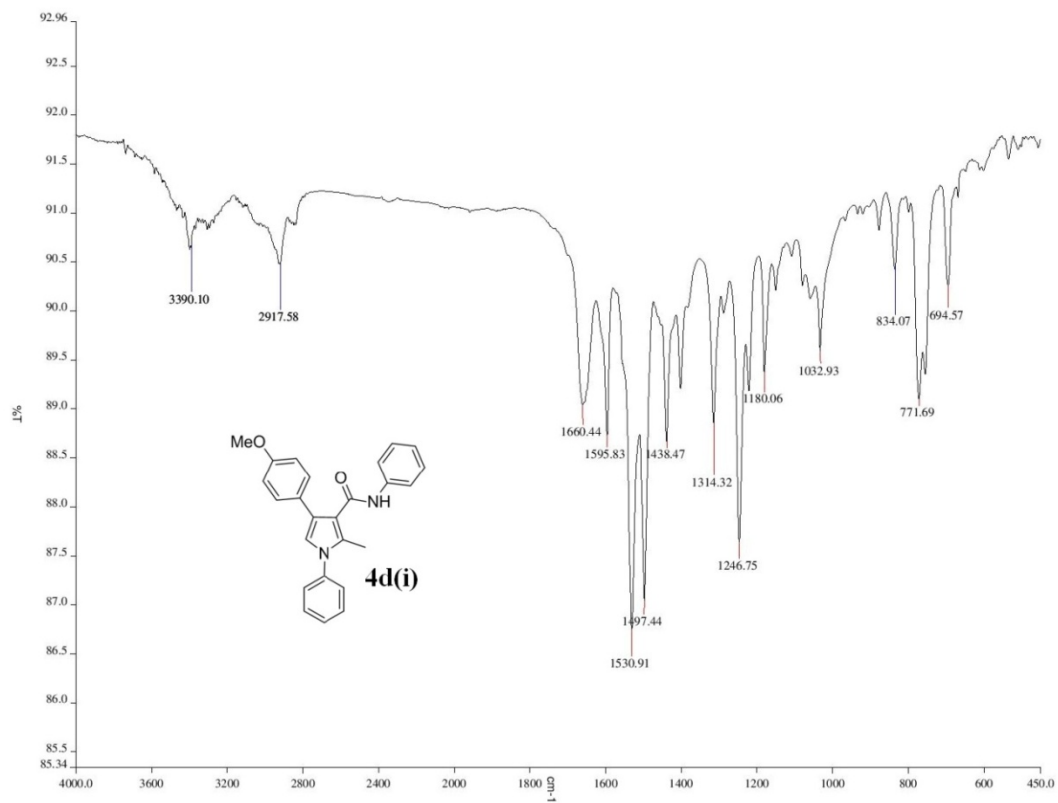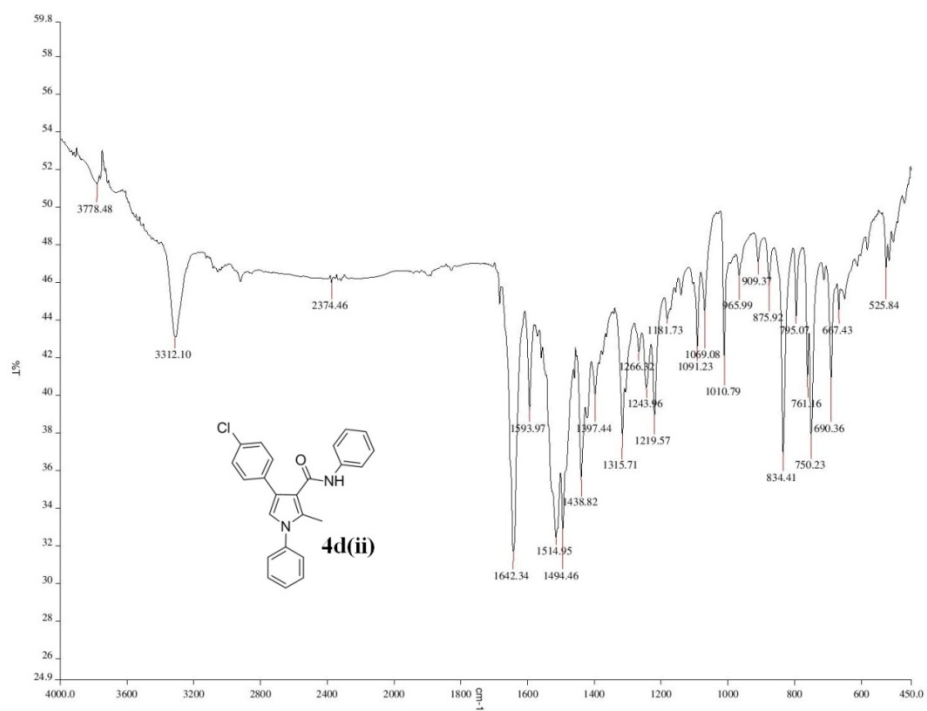

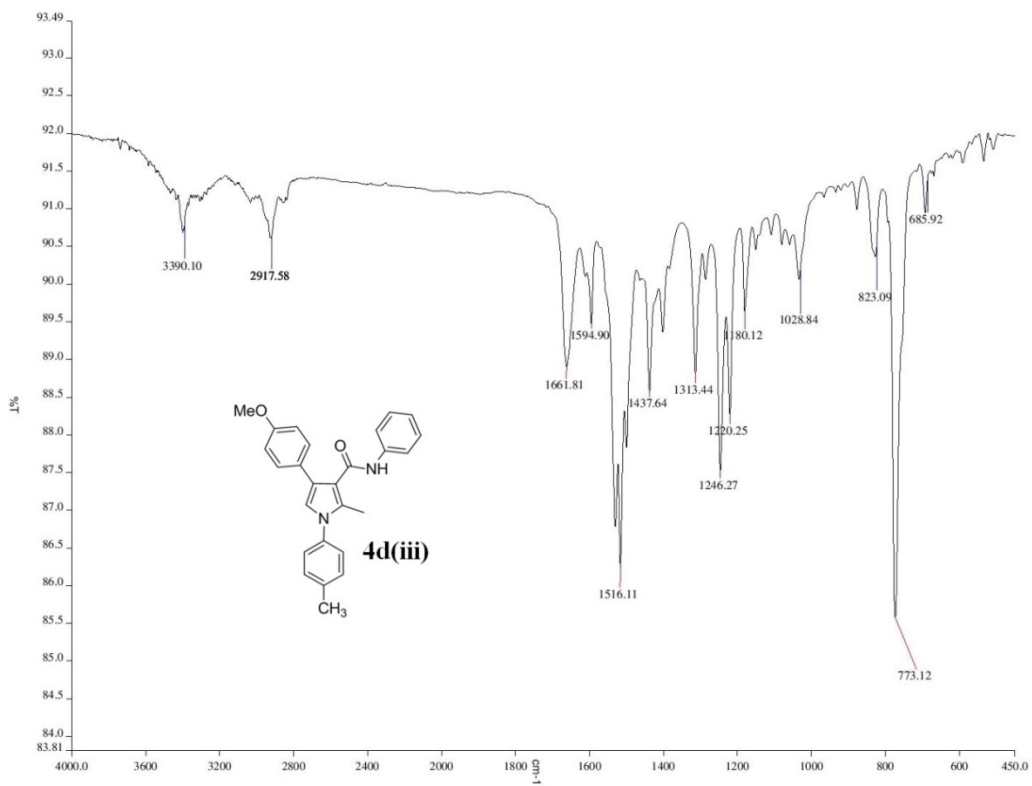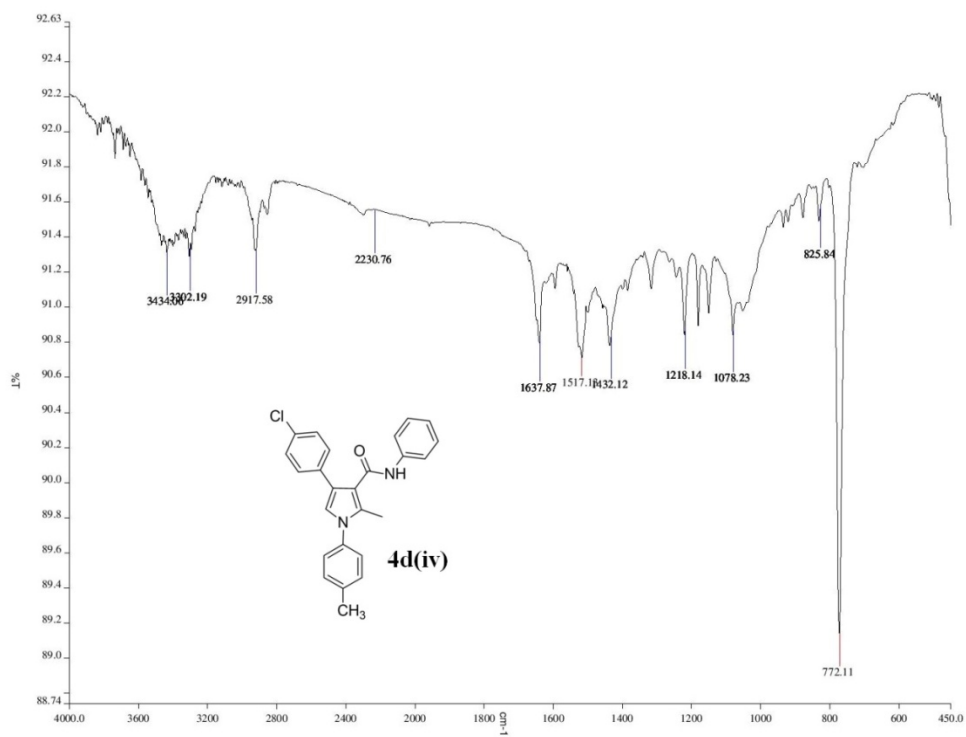

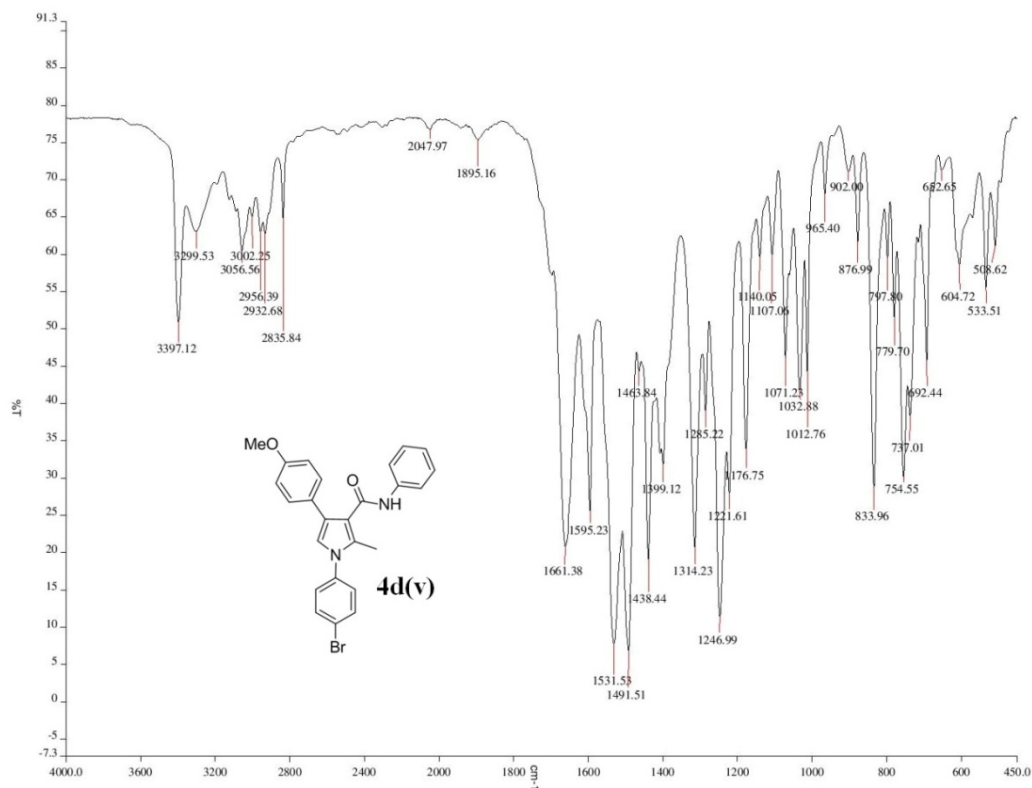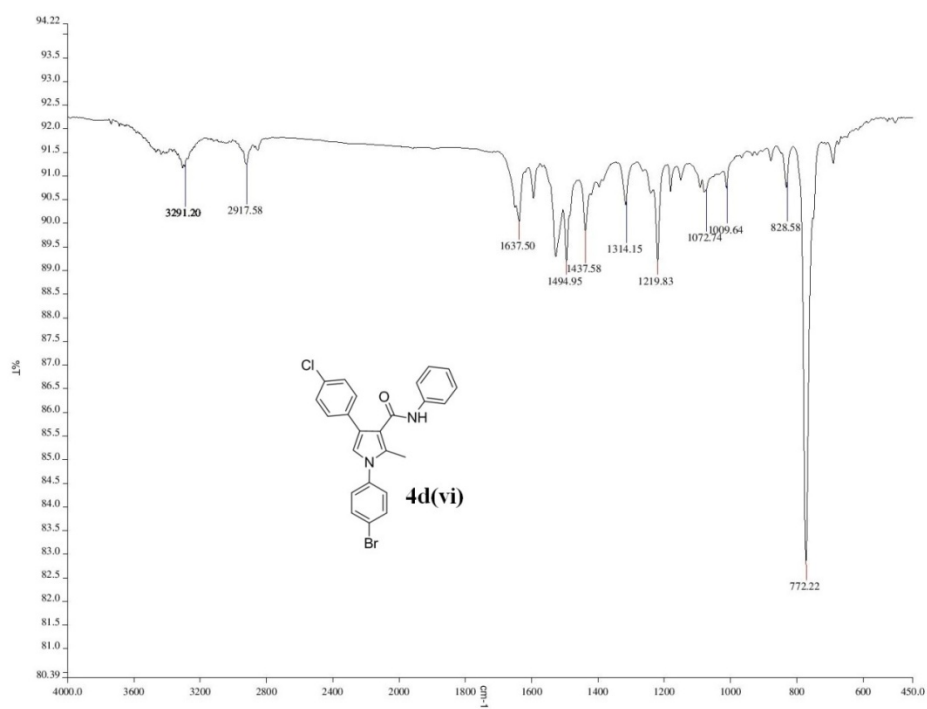

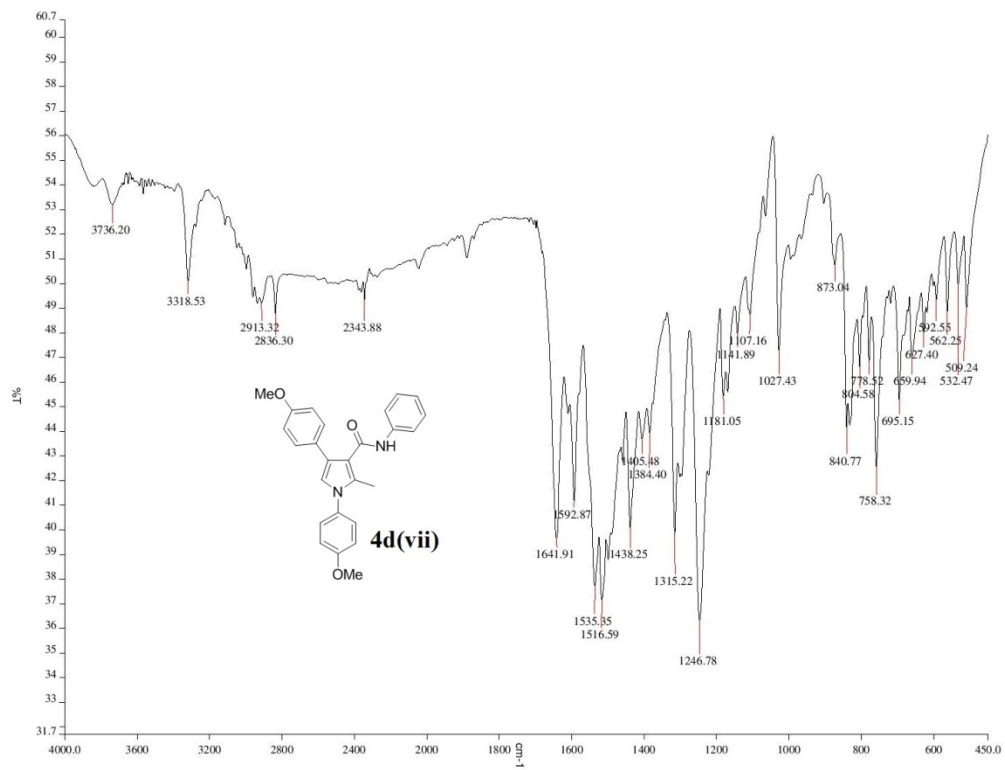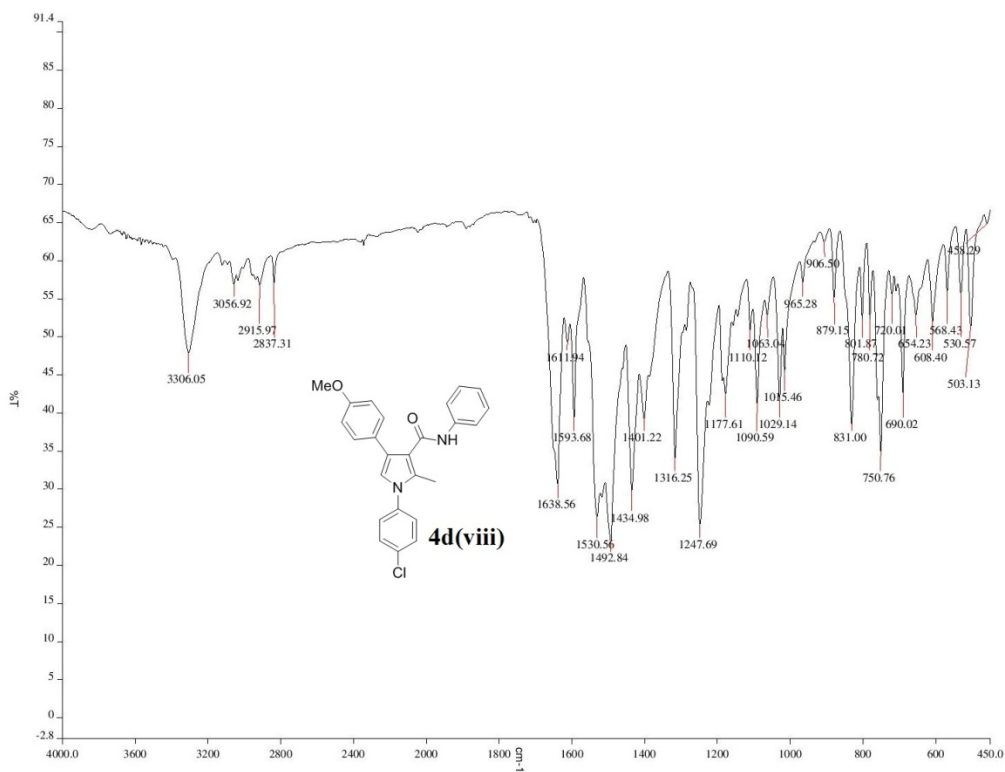

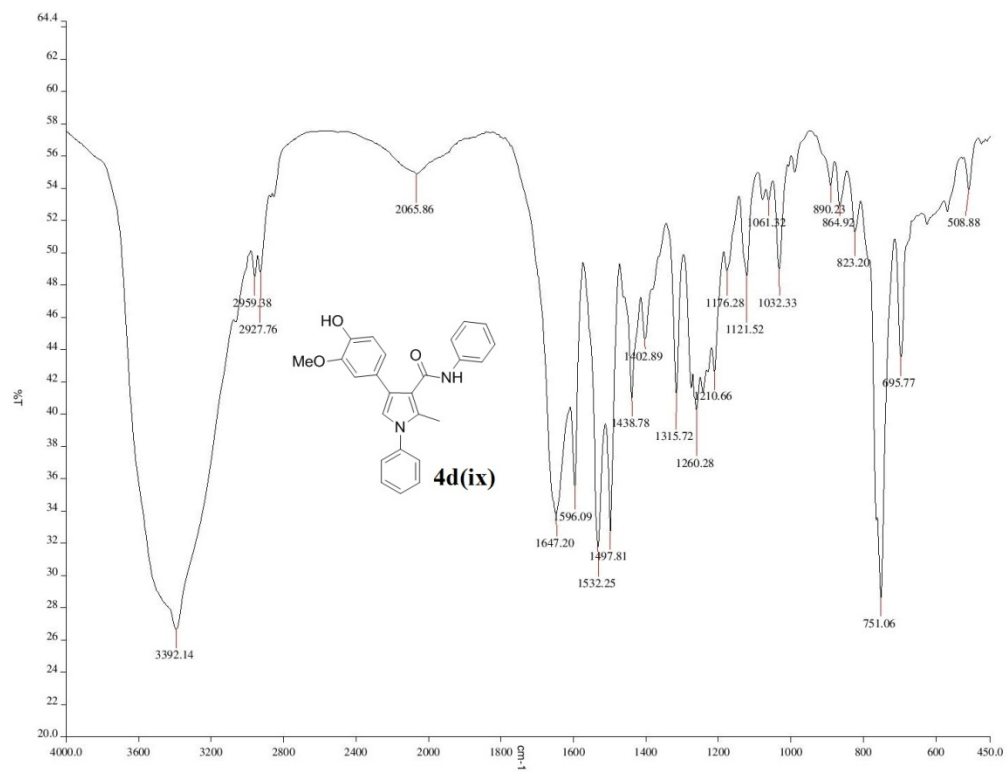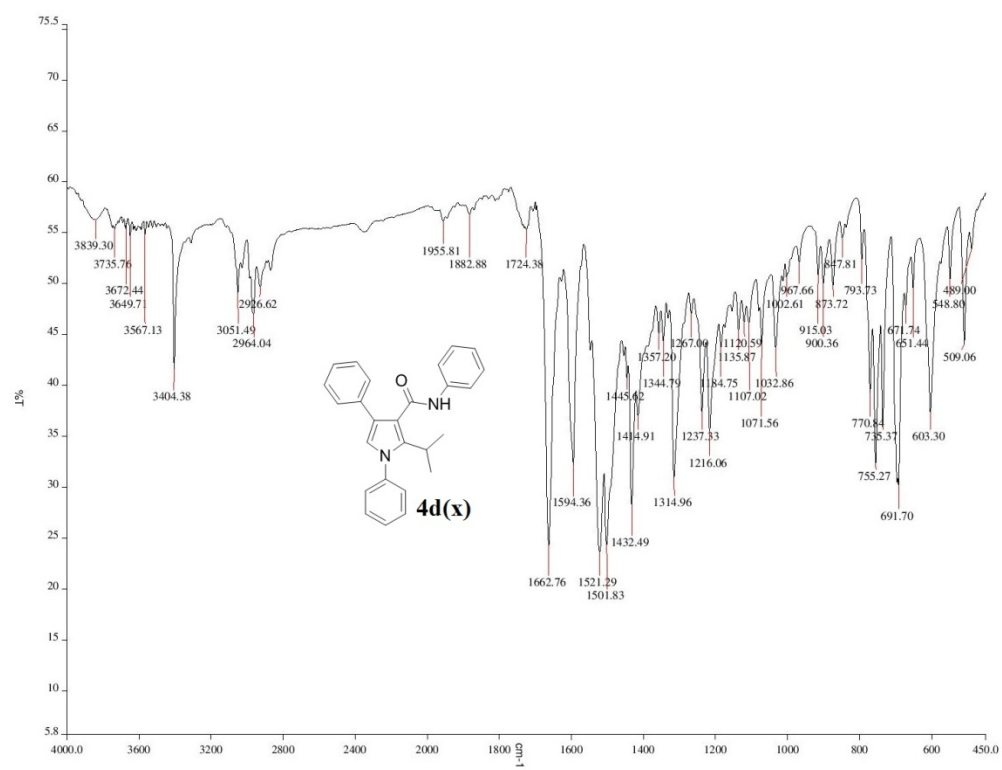

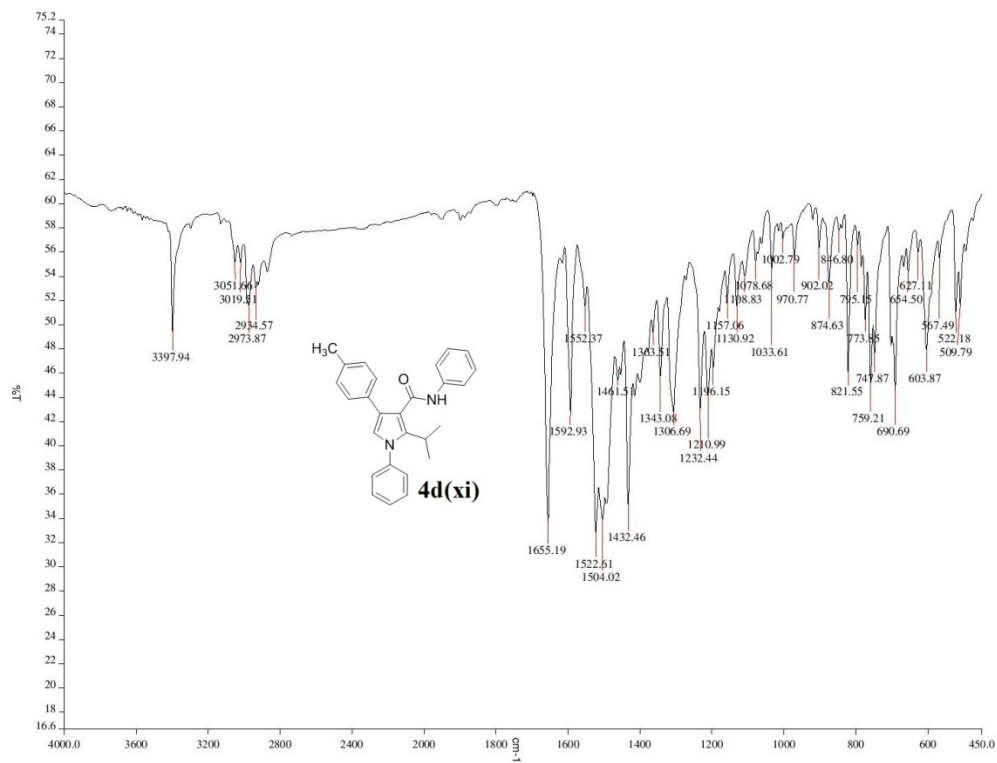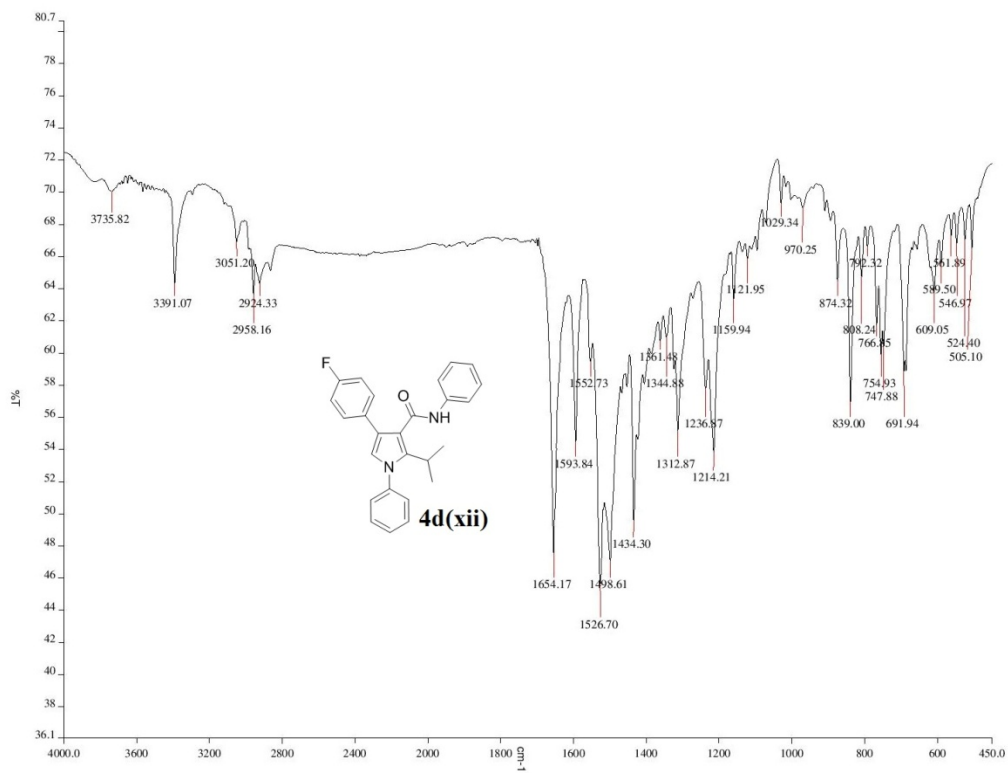



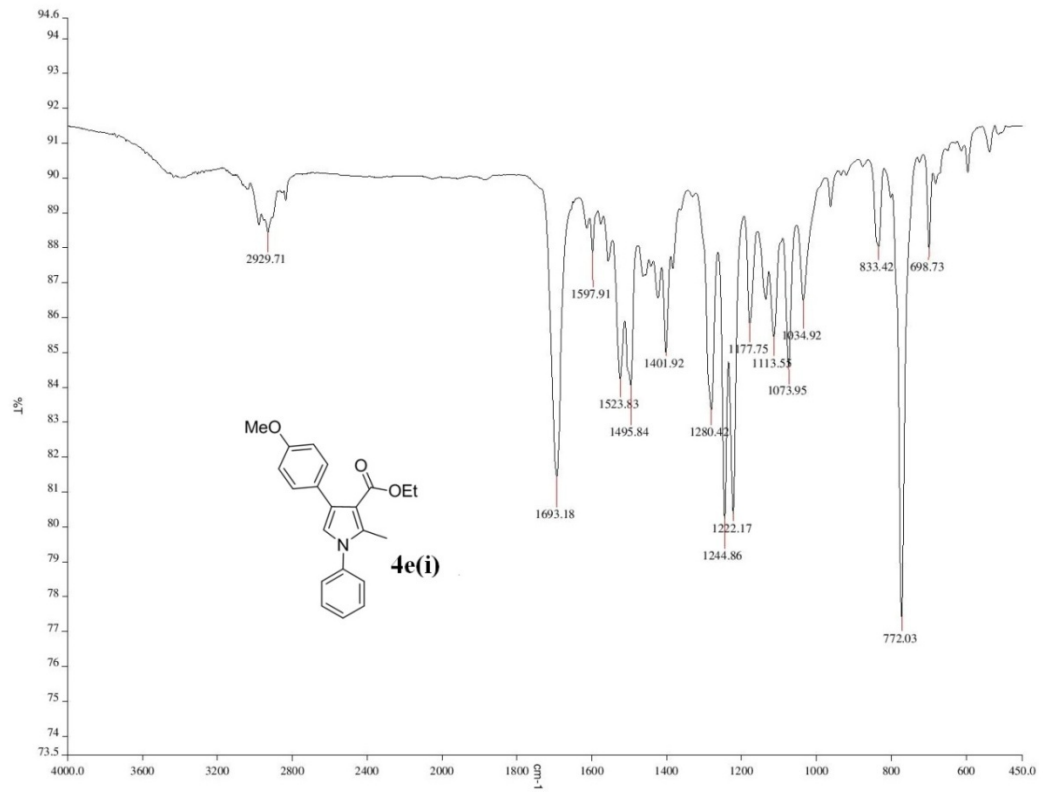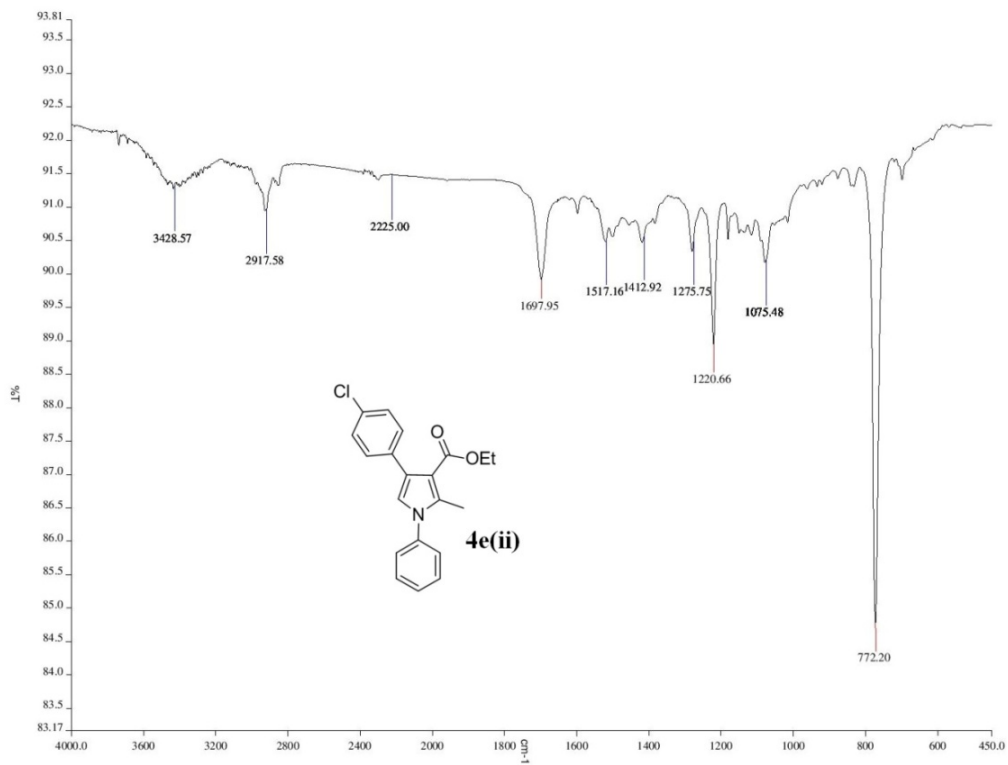

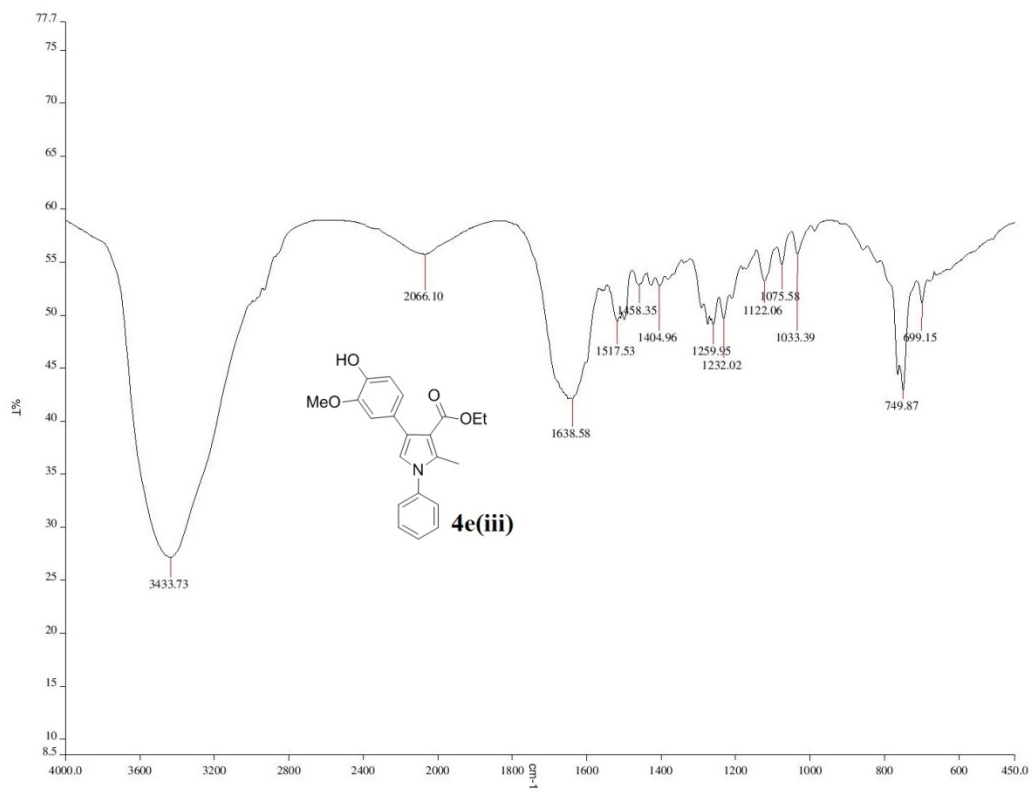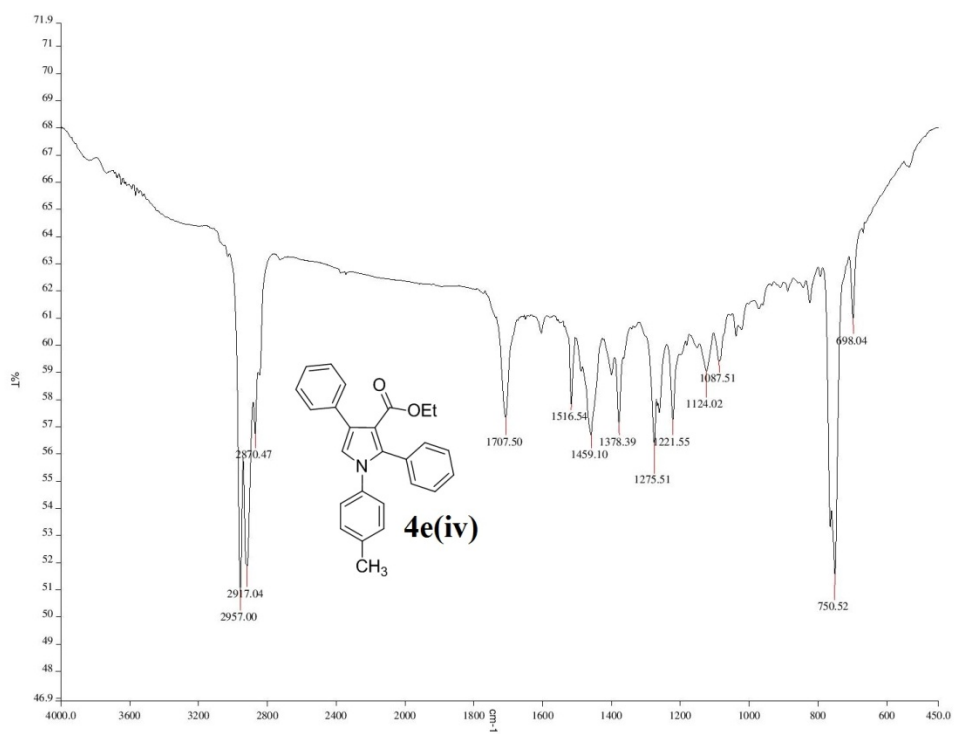

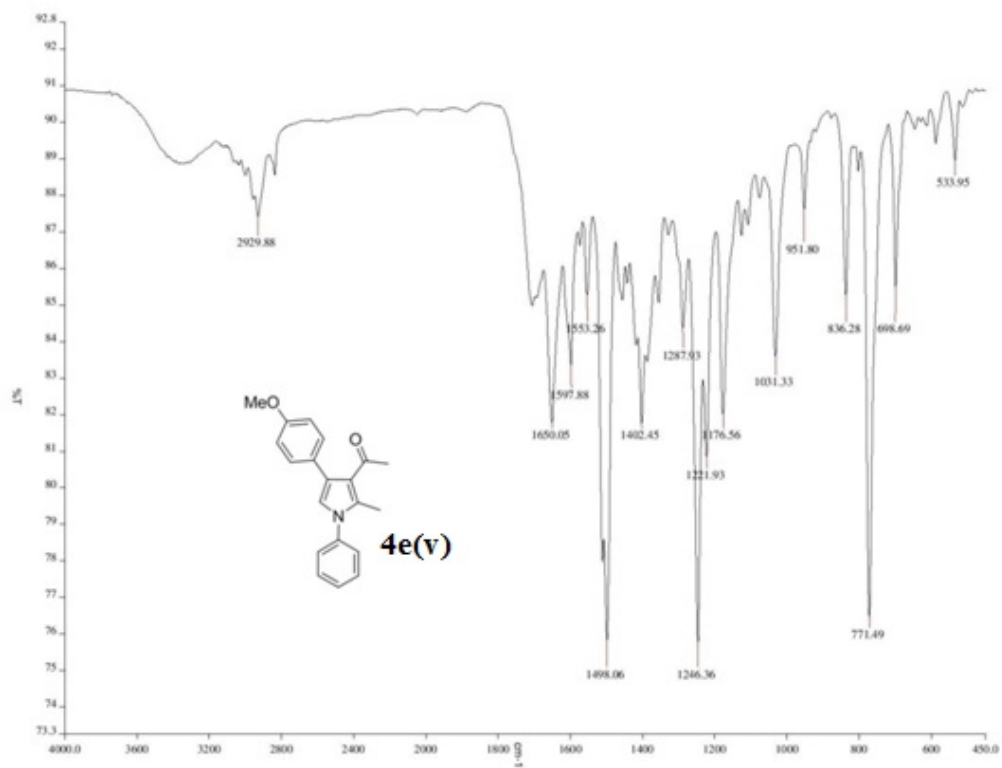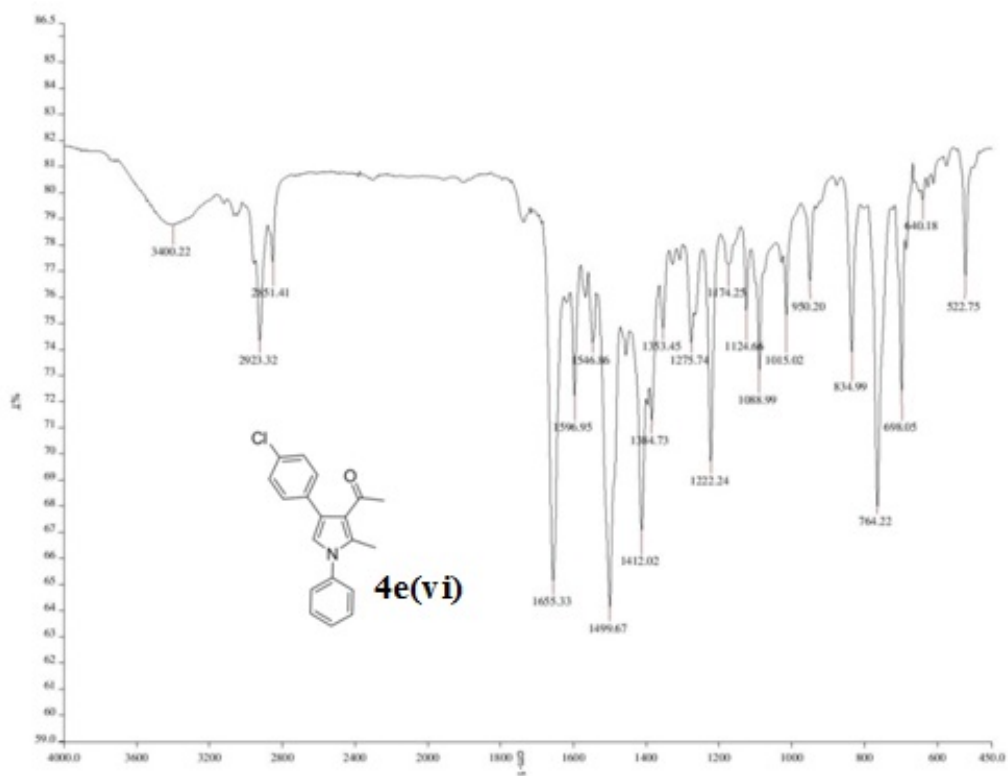

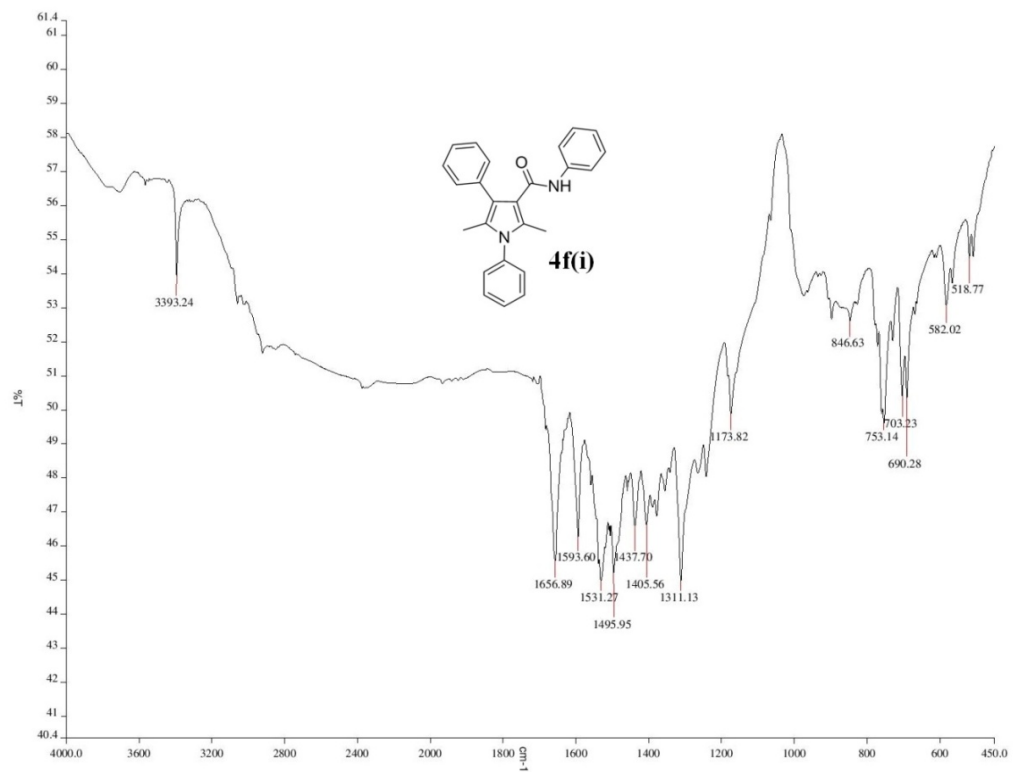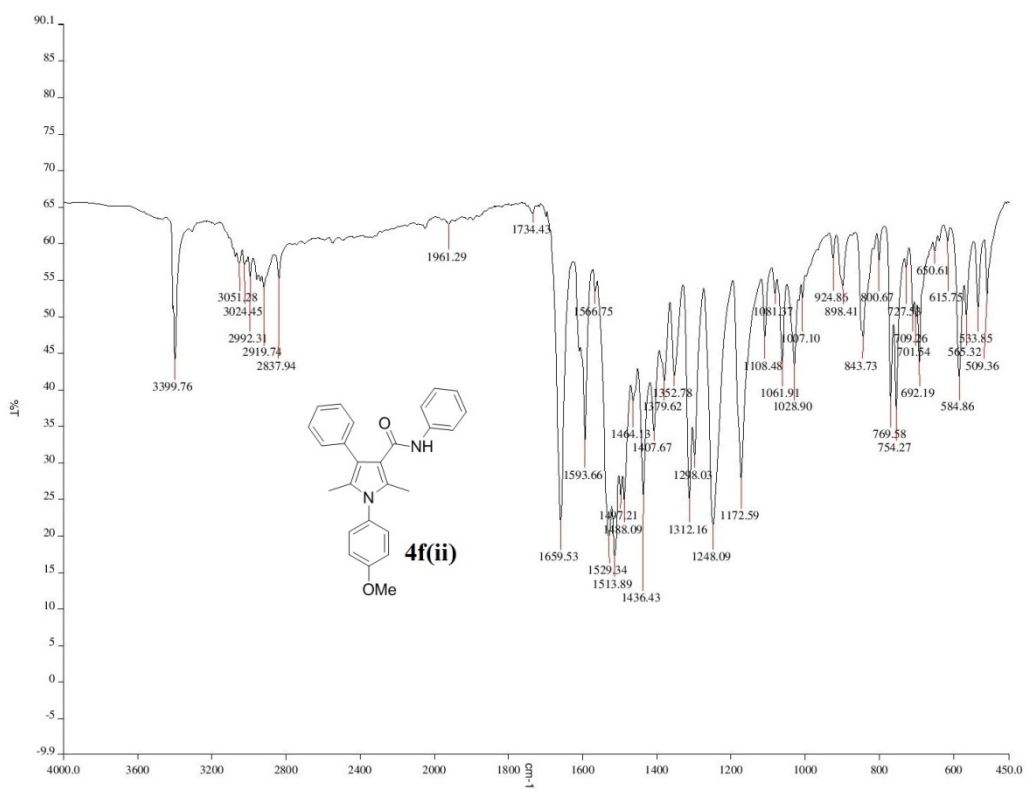

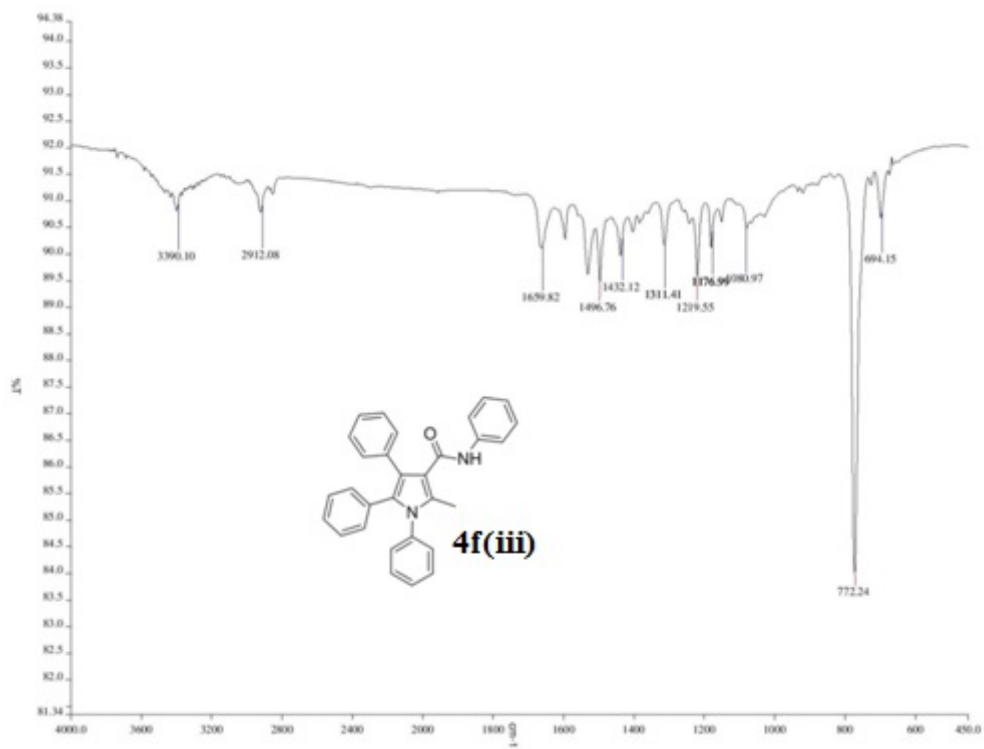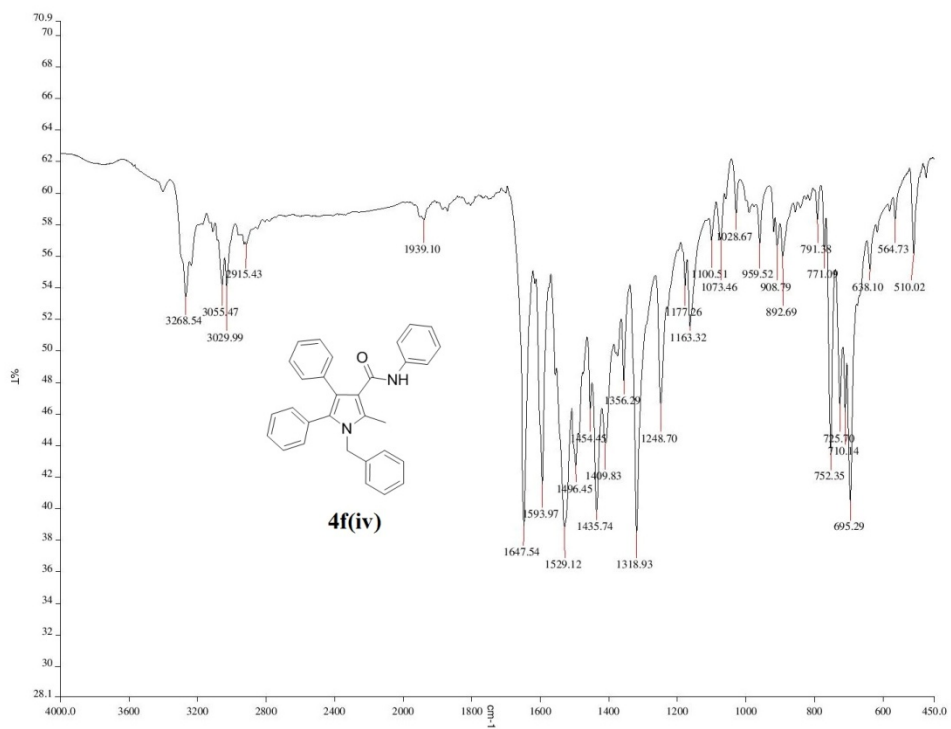

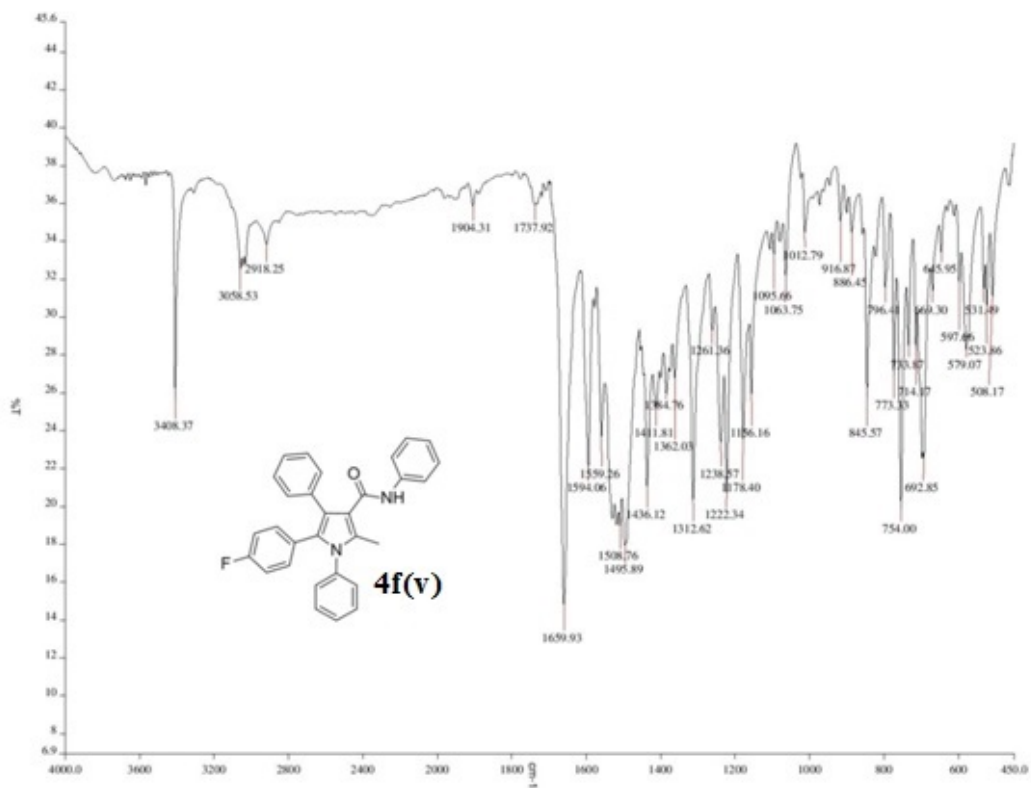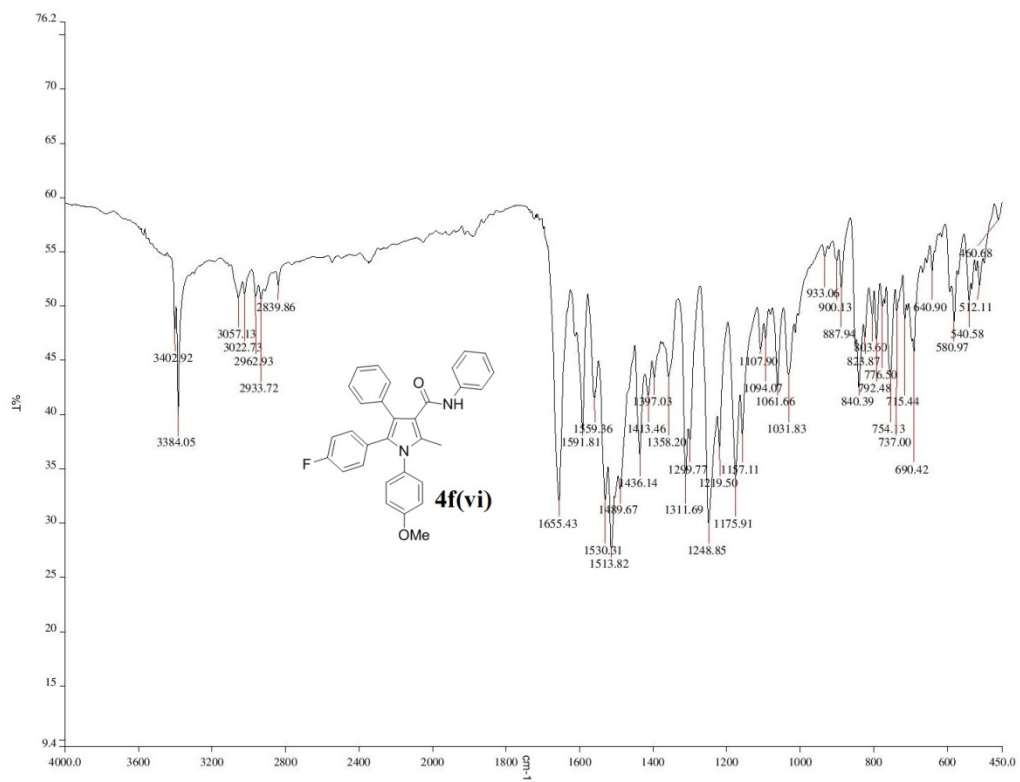

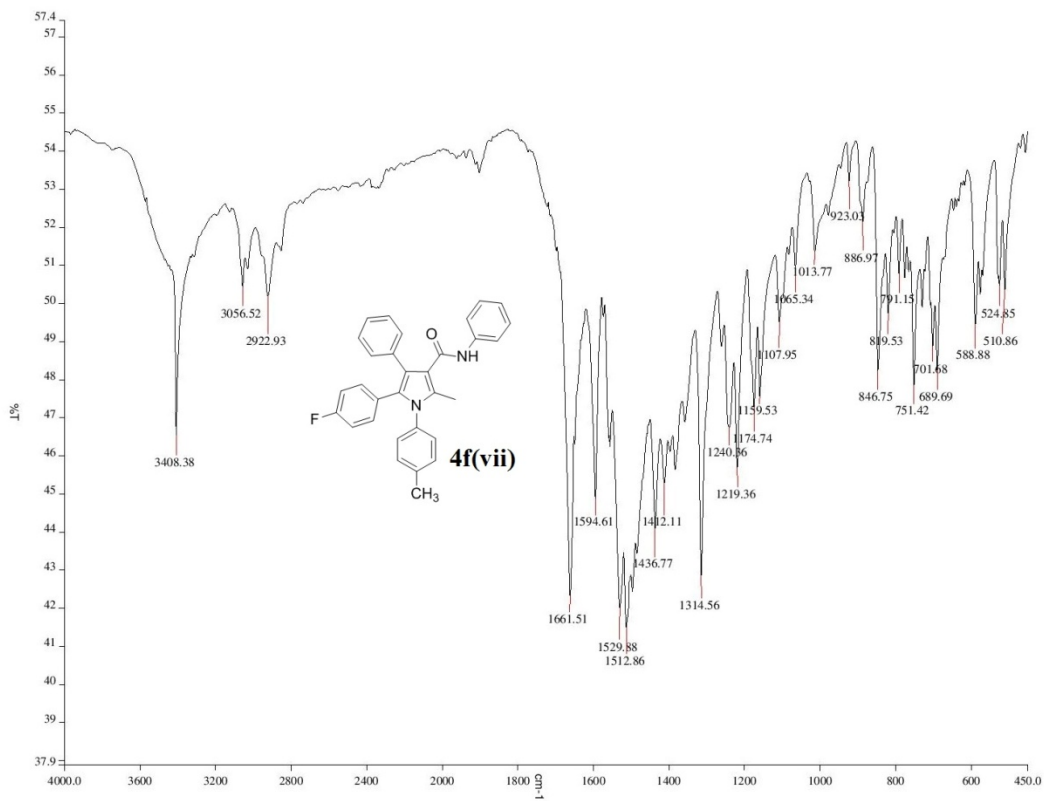

Supplement: c4ra09873k2.pdf [file c4ra09873k2.pdf]
