# Supplementary material for: Zirconocene dichloride catalysed one-pot synthesis of pyrroles through nitroalkene-enamine assembly
Source: Royal Society of Chemistry journal article supplement (doi:10.1039/c4ra09873k), 2014-12-10

**Zirconocene dichloride Catalysed One Pot  
Synthesis of Pyrroles through Nitroalkene-Enamine Assembly**

**Sandeep Goyal, Jatinkumar K. Patel, Mukesh Gangar, Kapil Kumar and Vipin A. Nair\***

**Supporting Information**

| <b>Contents</b>              | <b>Pages</b> |
|------------------------------|--------------|
| <b>Copies of NMR Spectra</b> | <b>2-44</b>  |

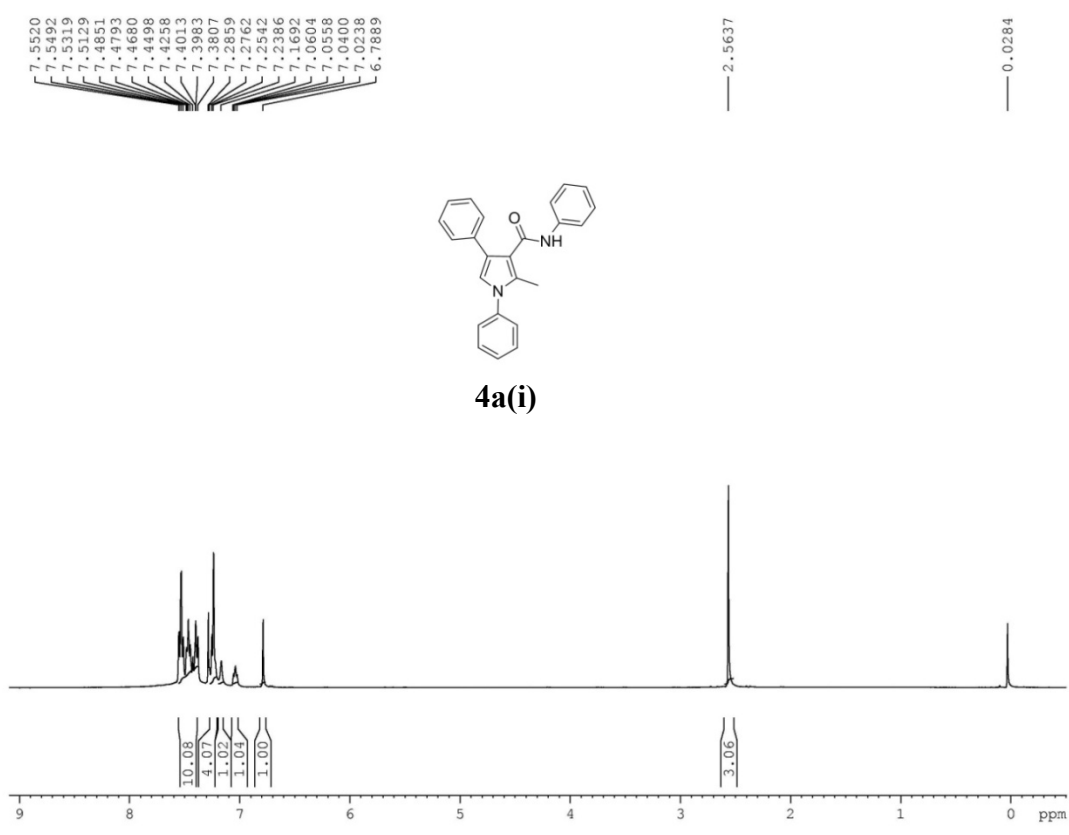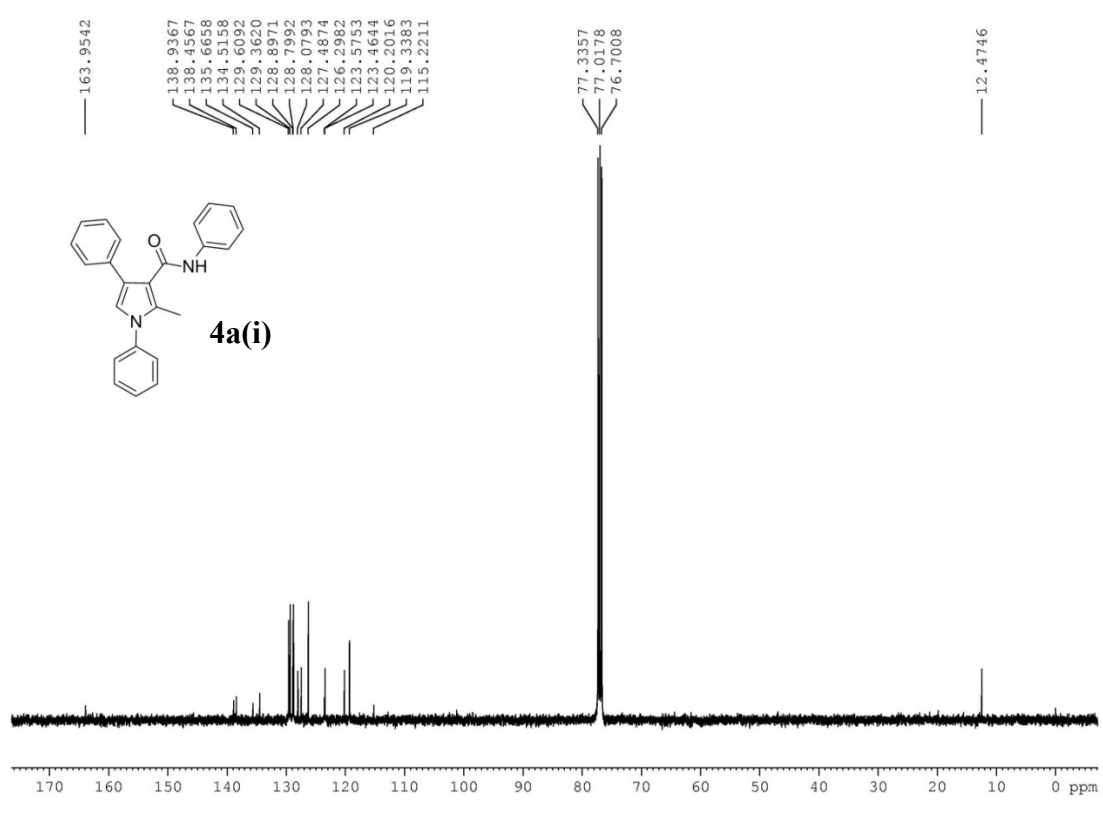

7.5309  
7.5269  
7.5098  
7.4669  
7.4452  
7.4305  
7.4062  
7.4027  
7.3883  
7.3048  
7.2958  
7.2904  
7.2739  
7.2589  
7.2370  
7.2205  
7.2025  
7.1472  
7.0376  
7.0317  
7.0237  
7.0186  
7.0016  
6.7263

3.8870

2.5124

0.0150

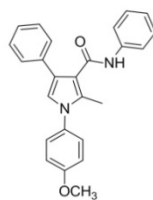

4a(ii)

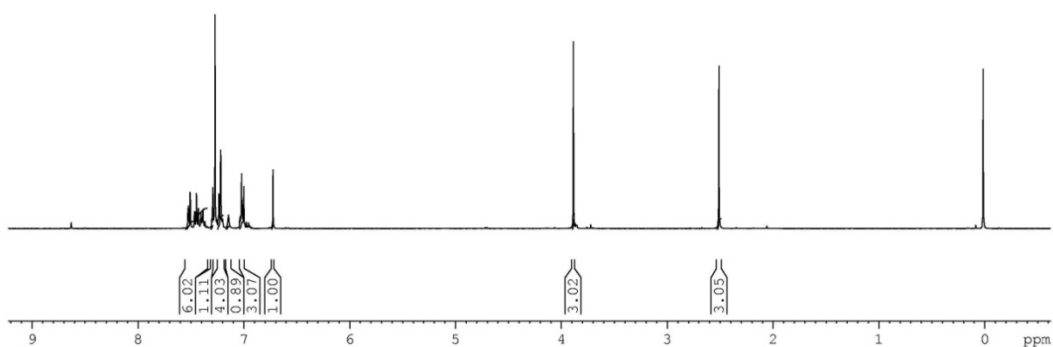

164.0165  
159.2474

138.4747  
136.0008  
134.5673  
131.7748  
129.6090  
128.8923  
128.8071  
127.5231  
127.4353  
123.4271  
123.2420  
120.4455  
119.2998  
114.7427  
114.4391

77.3708  
77.0532  
76.7352

55.5957

12.3853

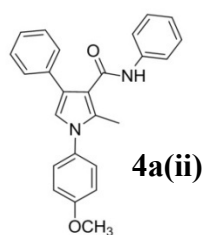

4a(ii)

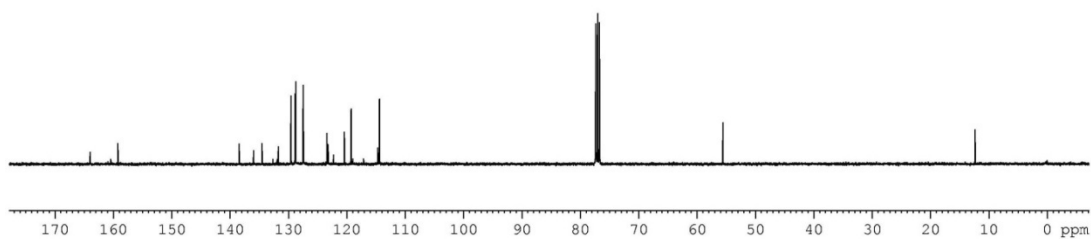

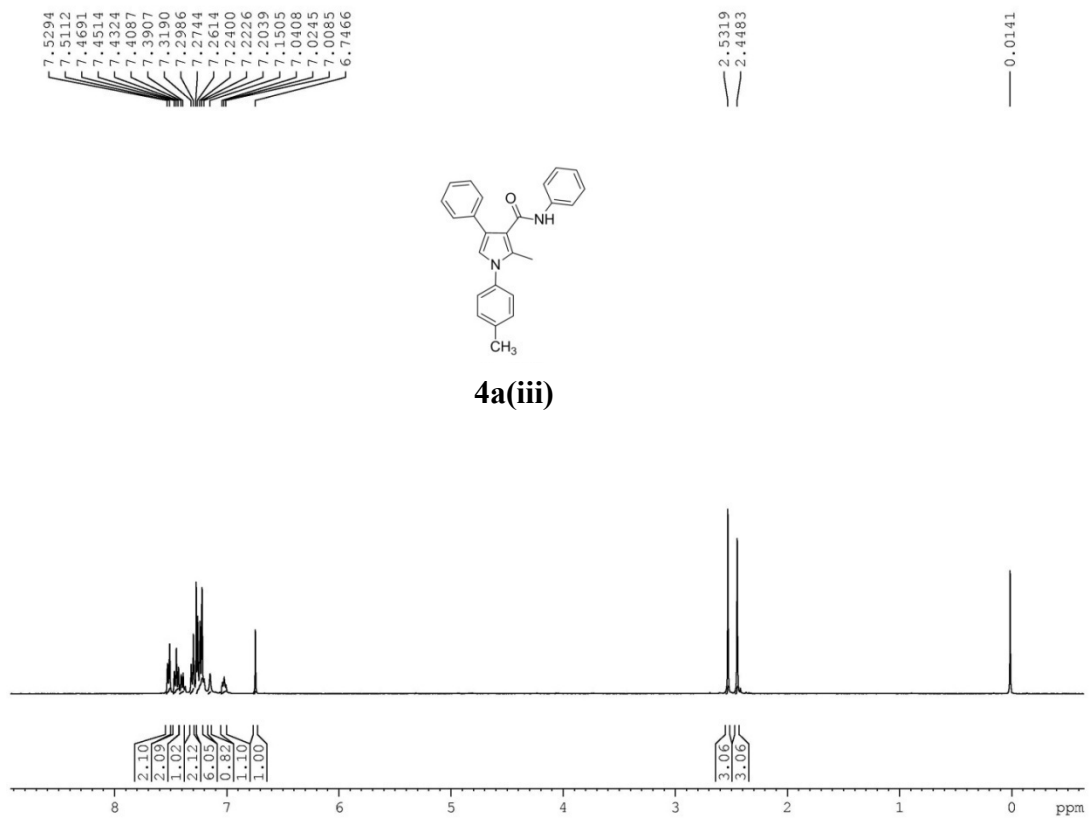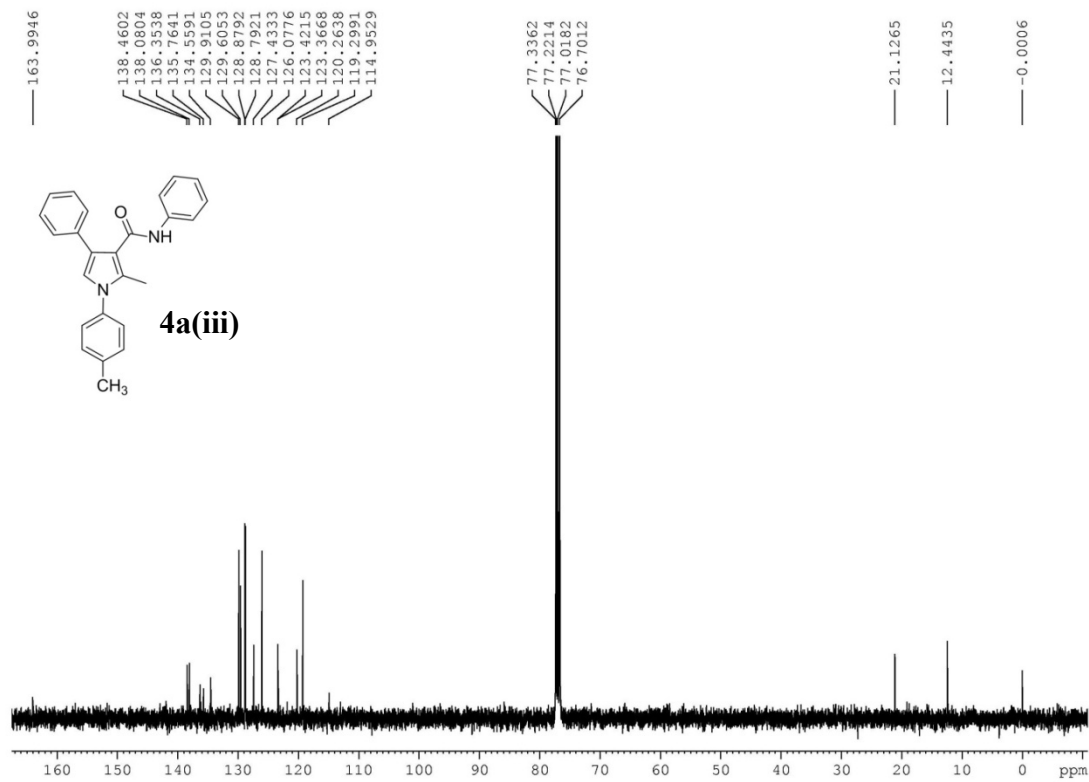

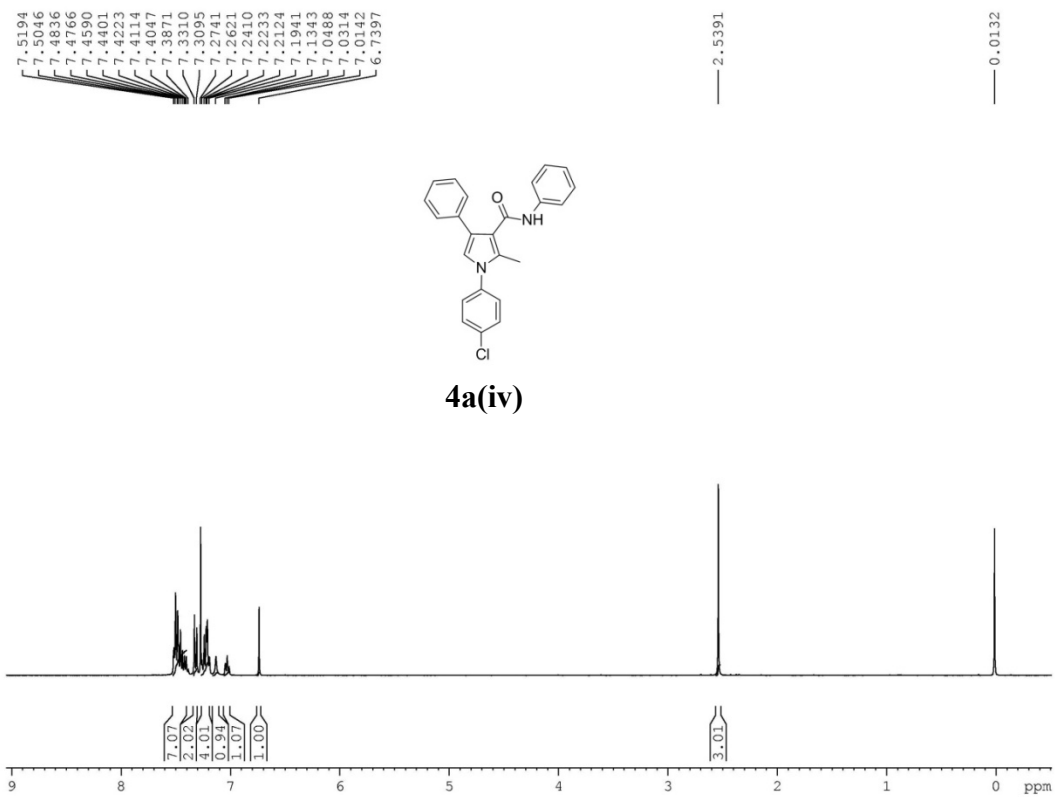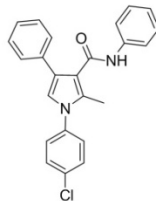

**4a(iv)**

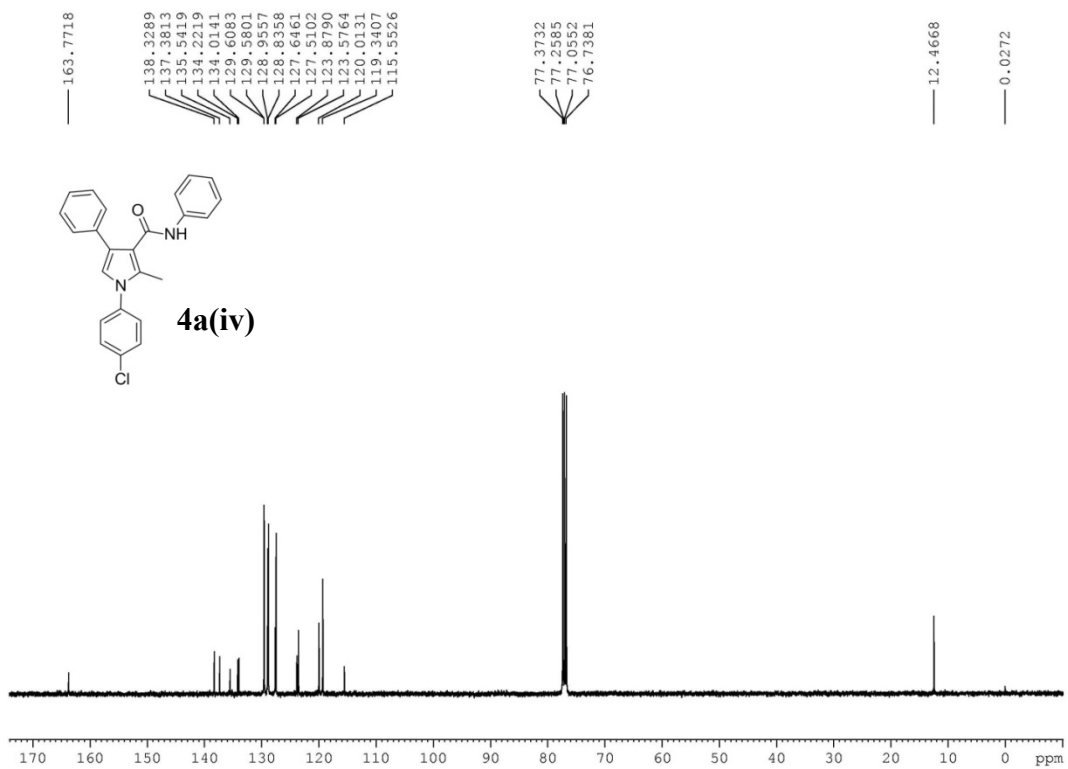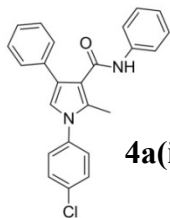

**4a(iv)**

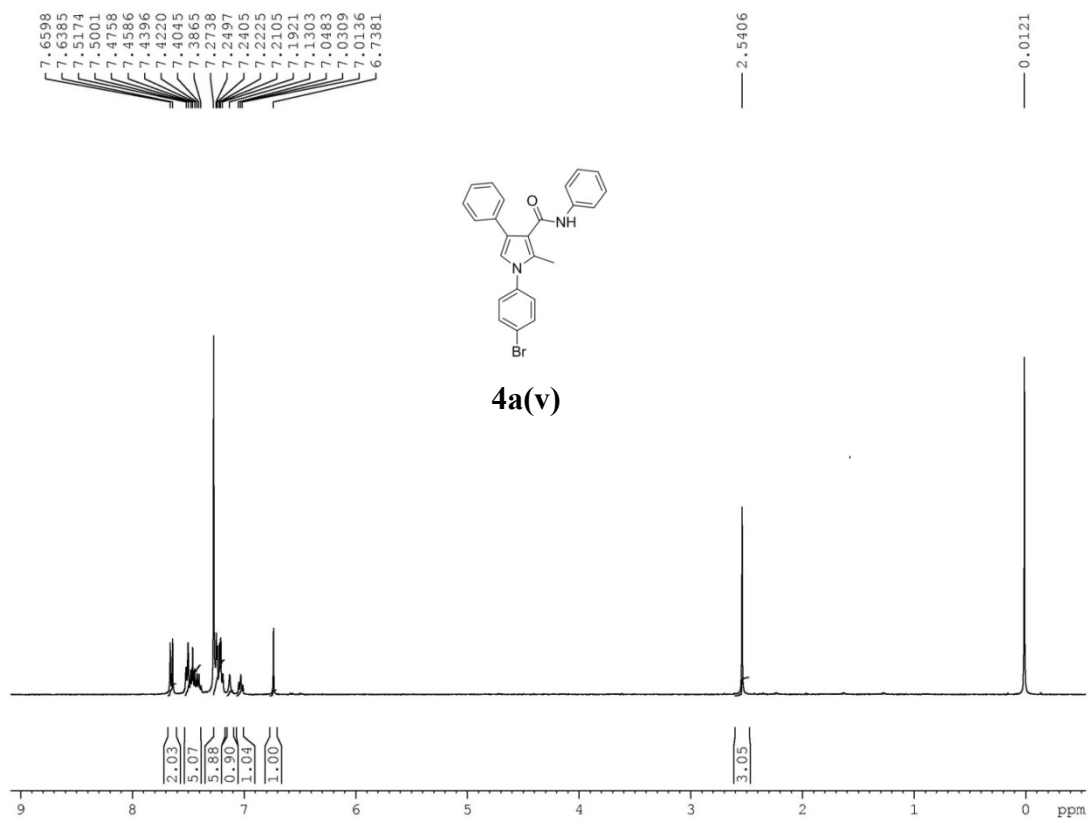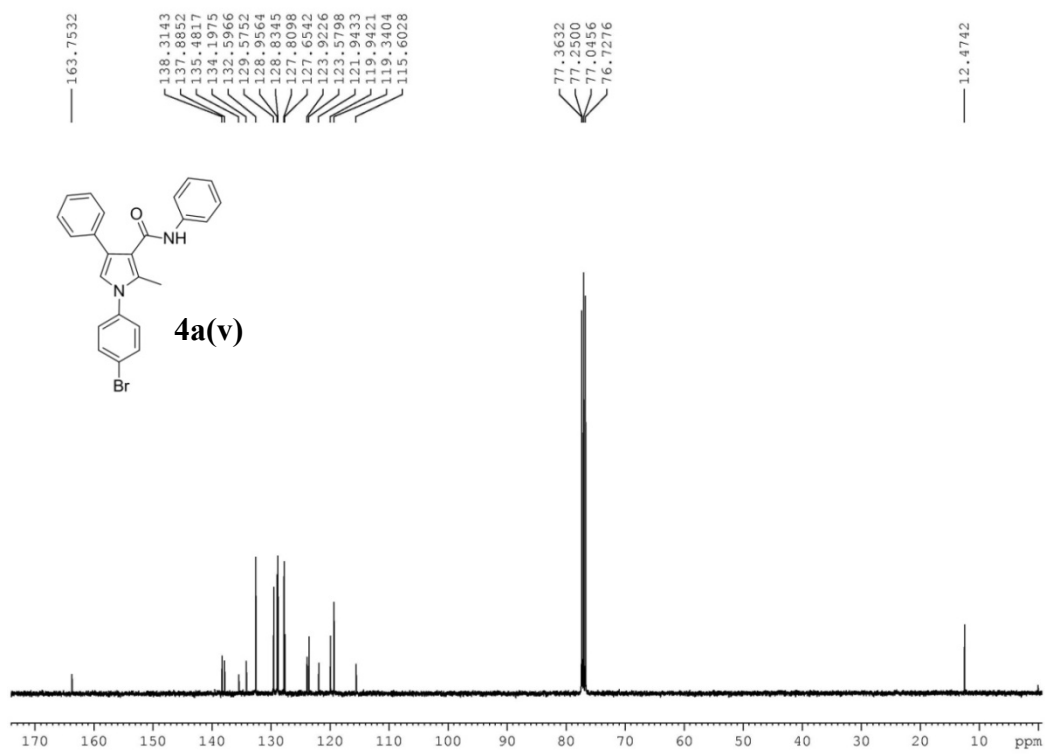

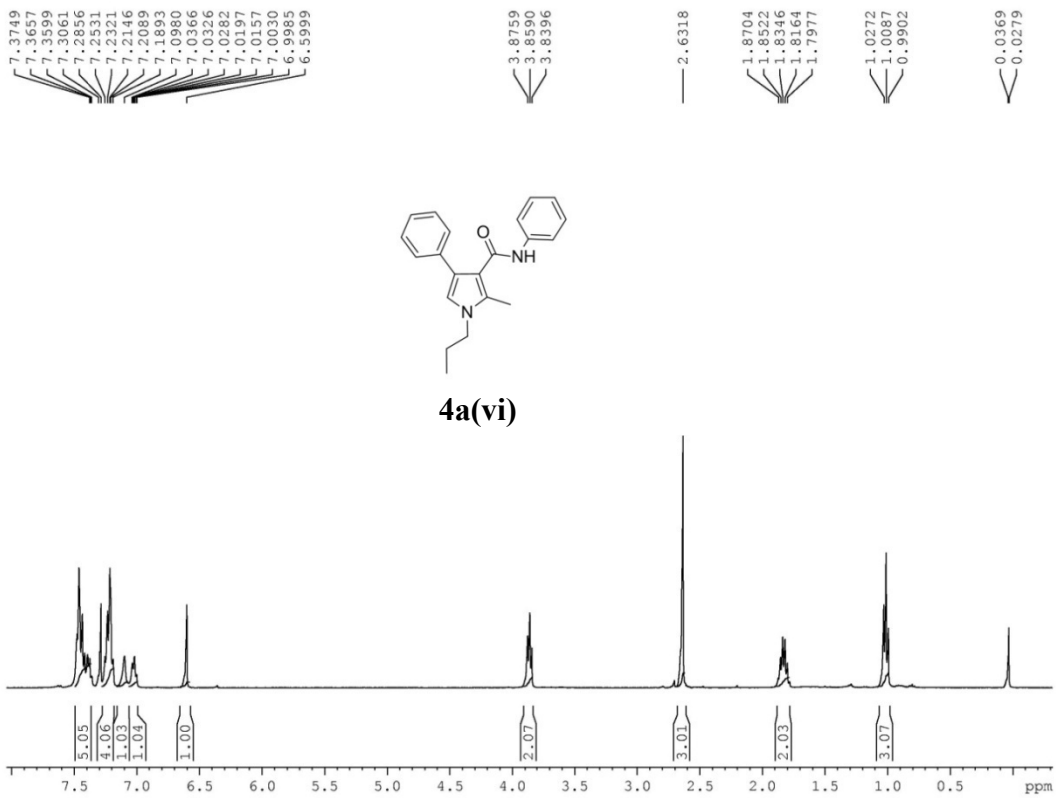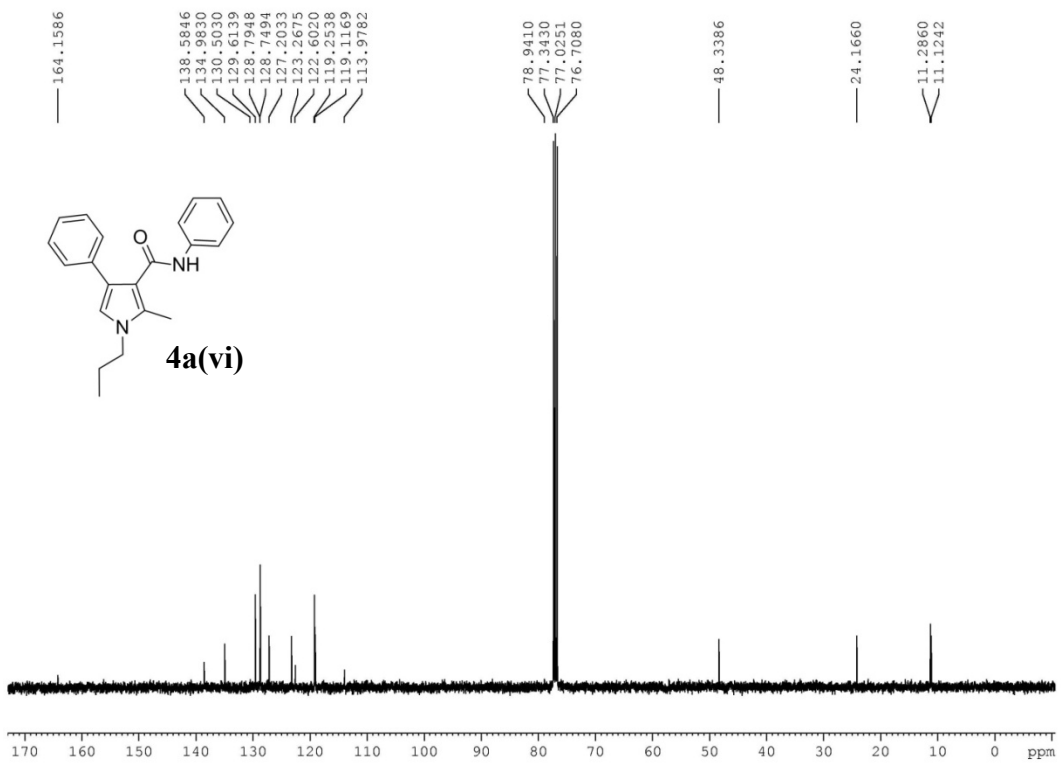

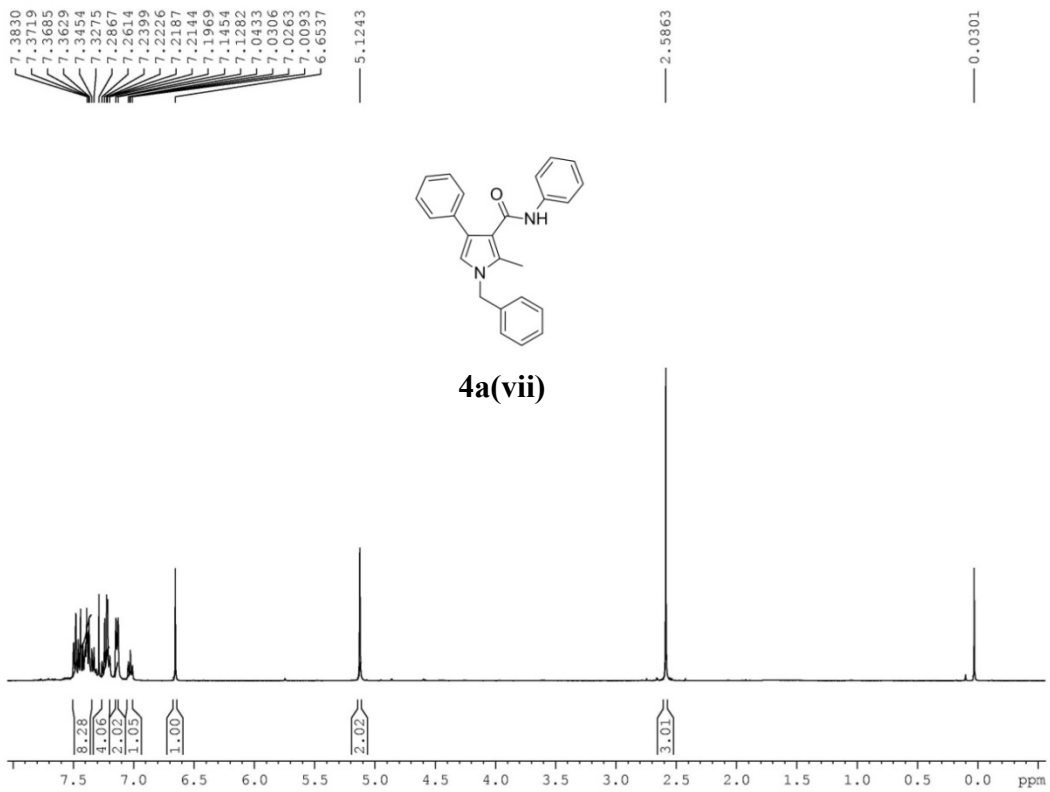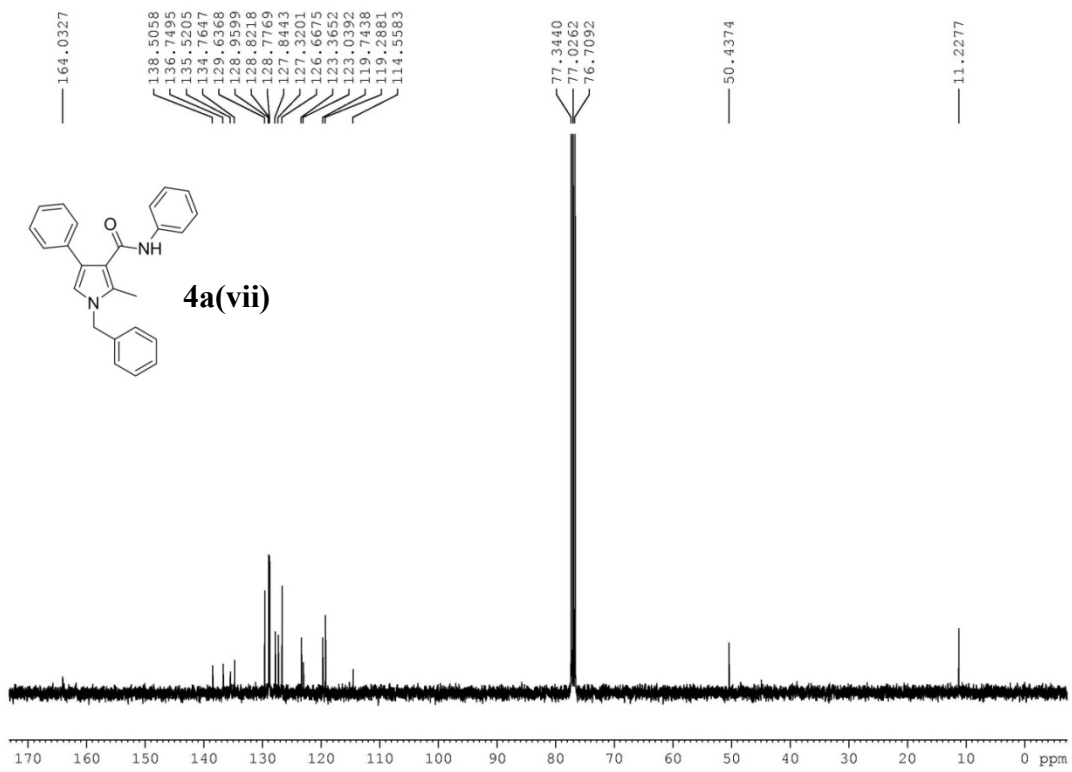



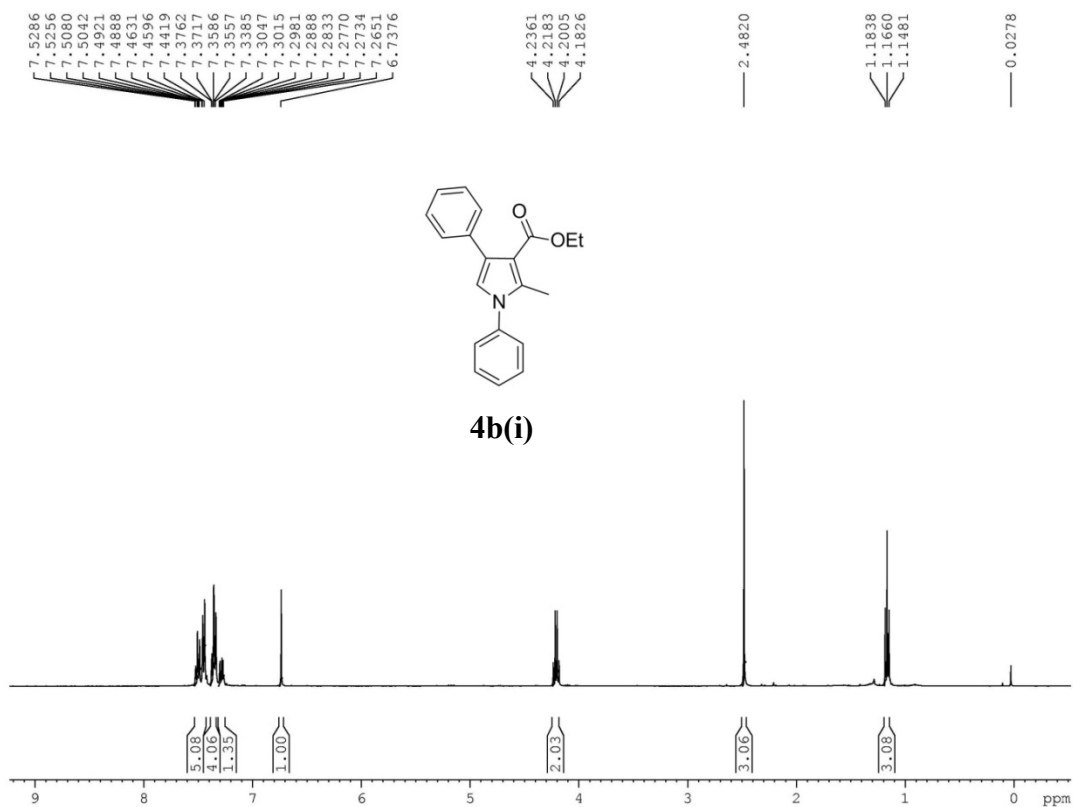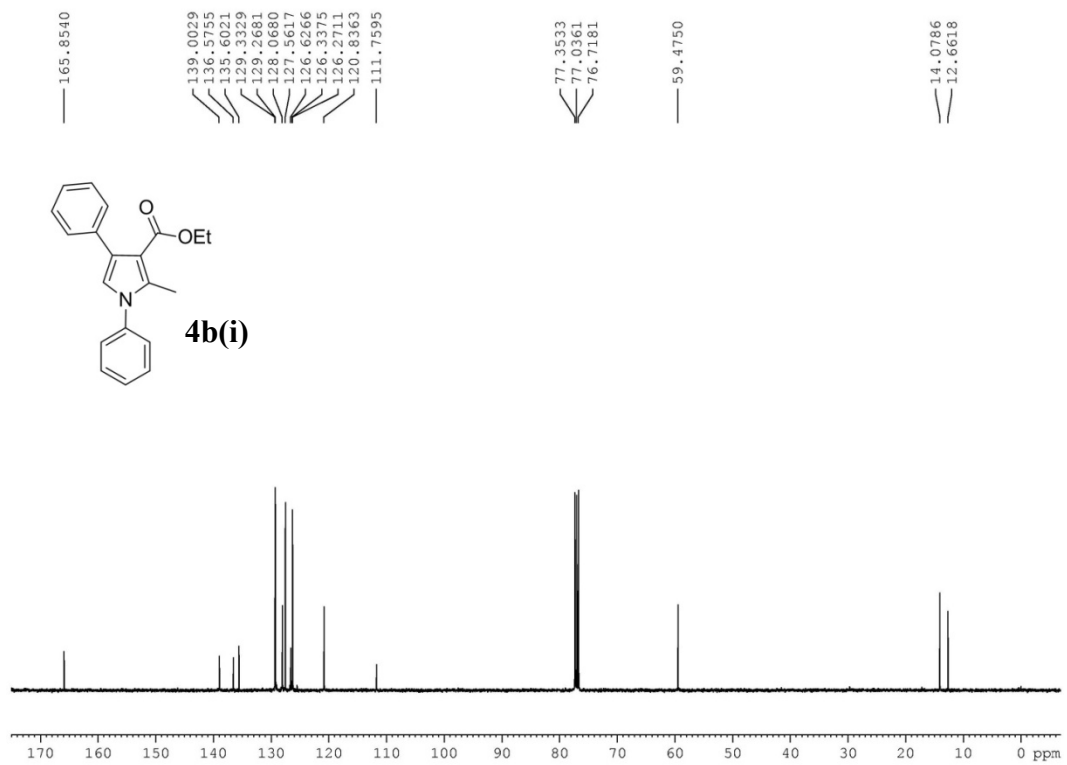

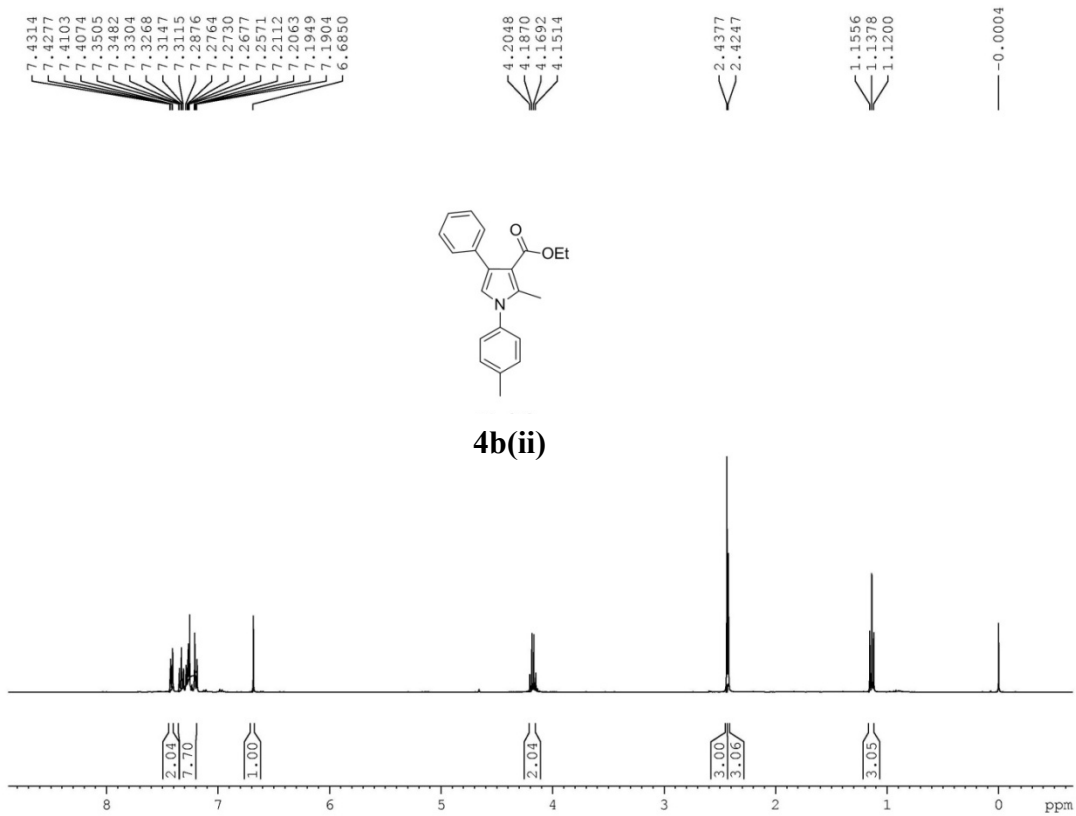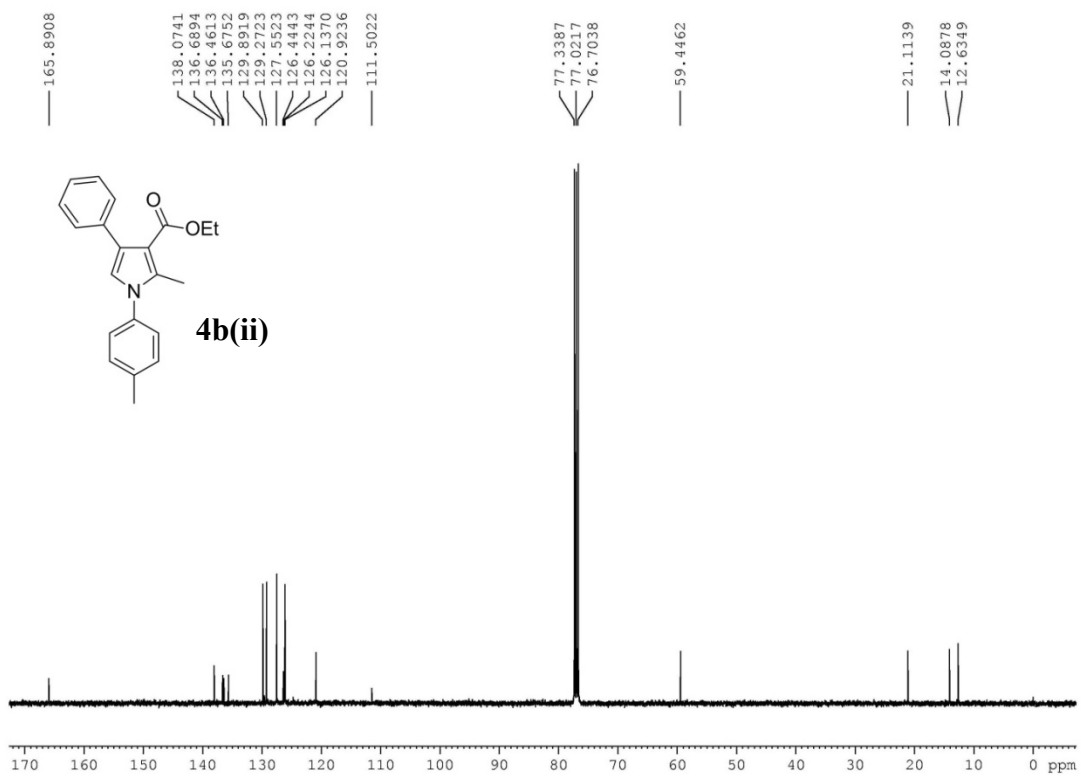

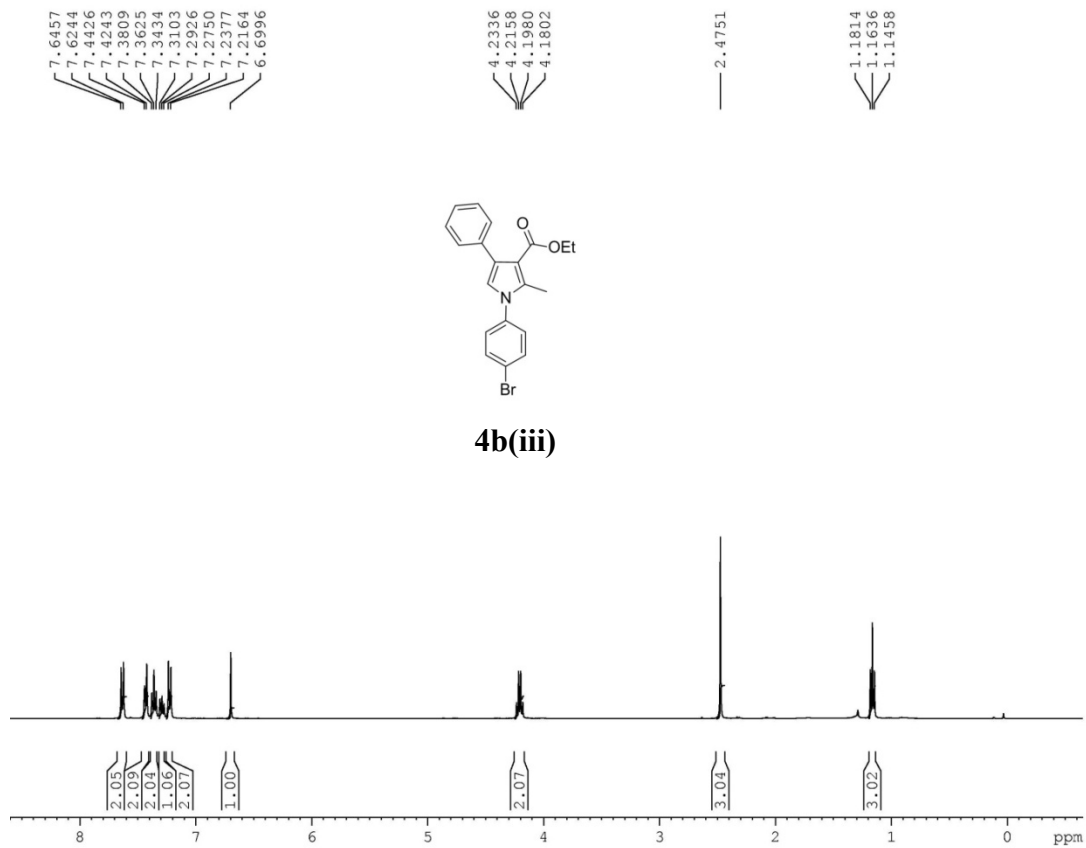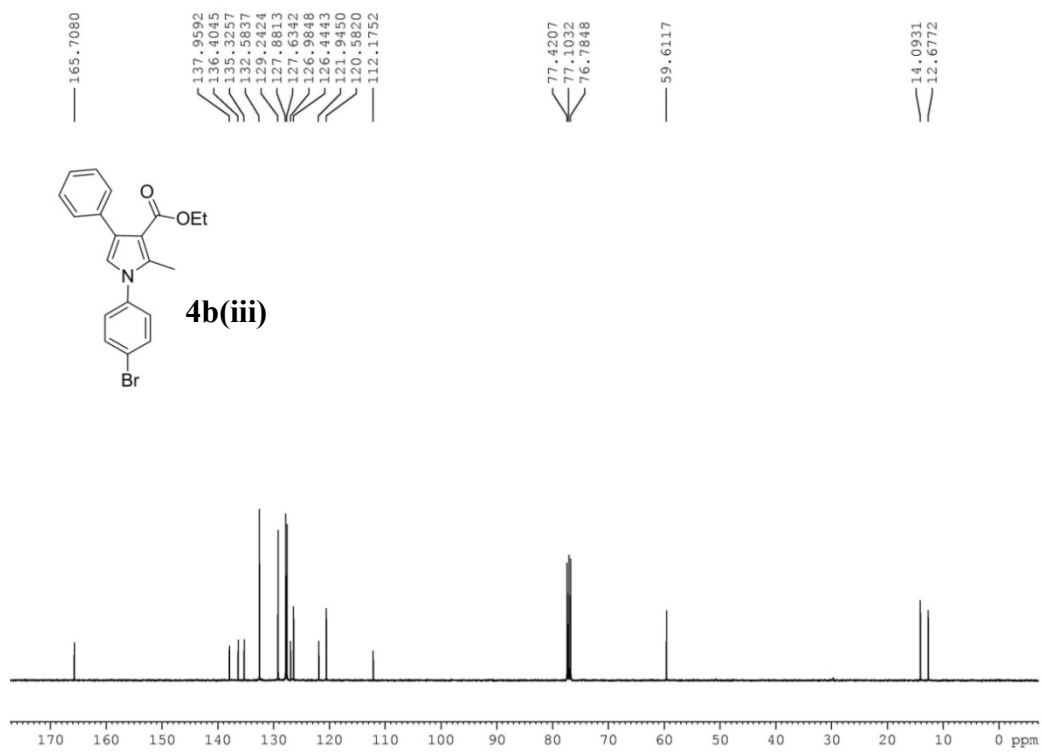

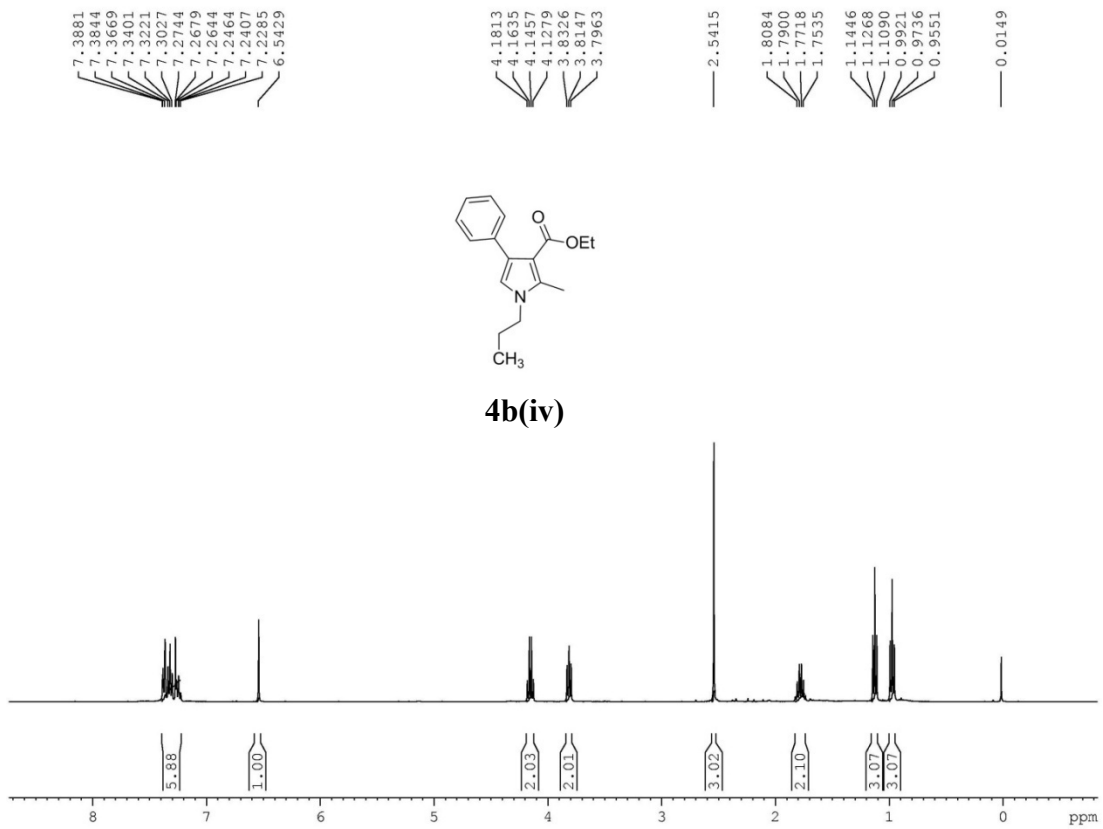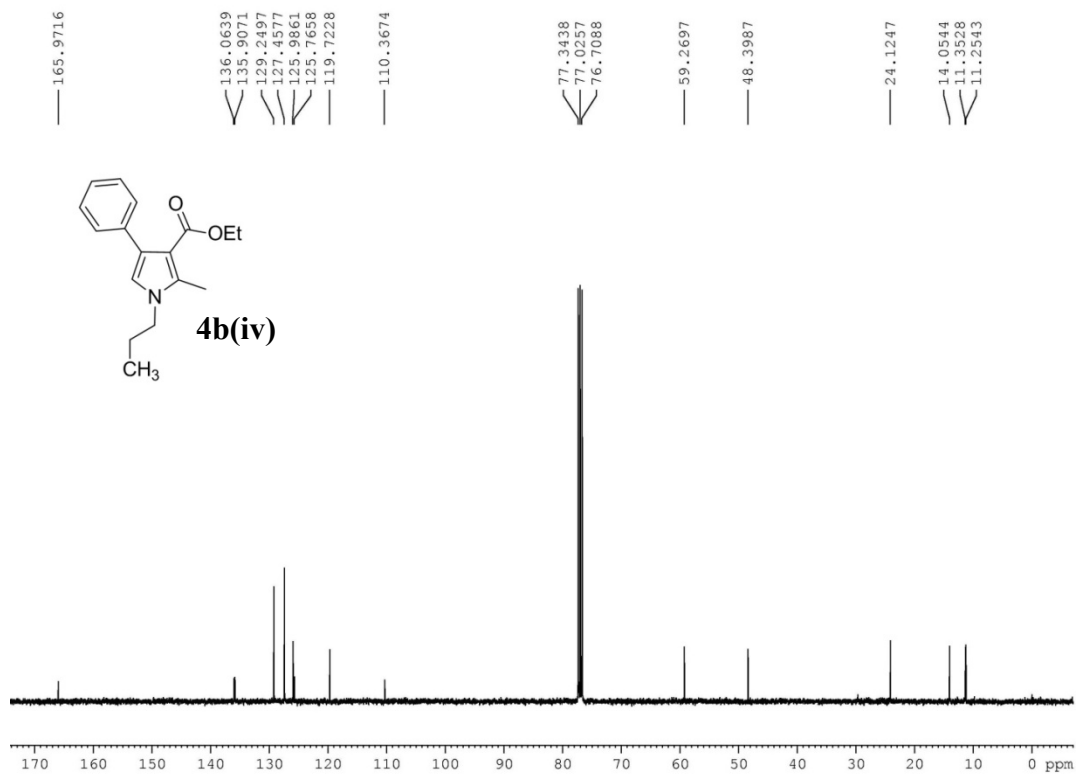

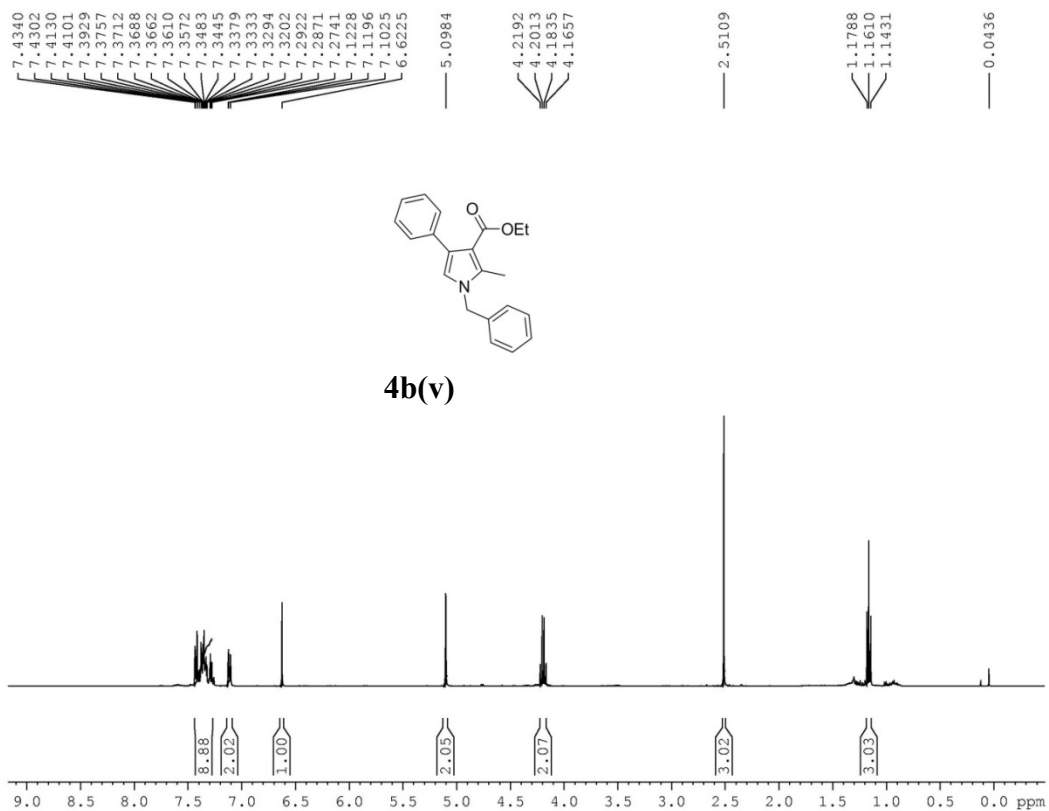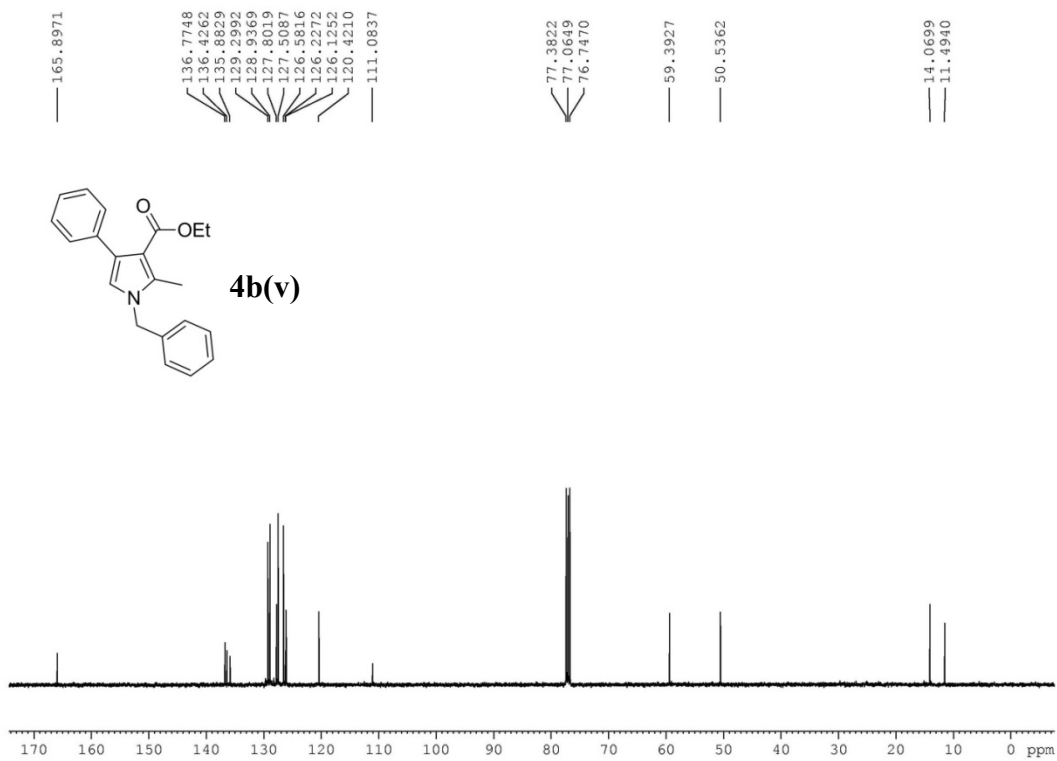

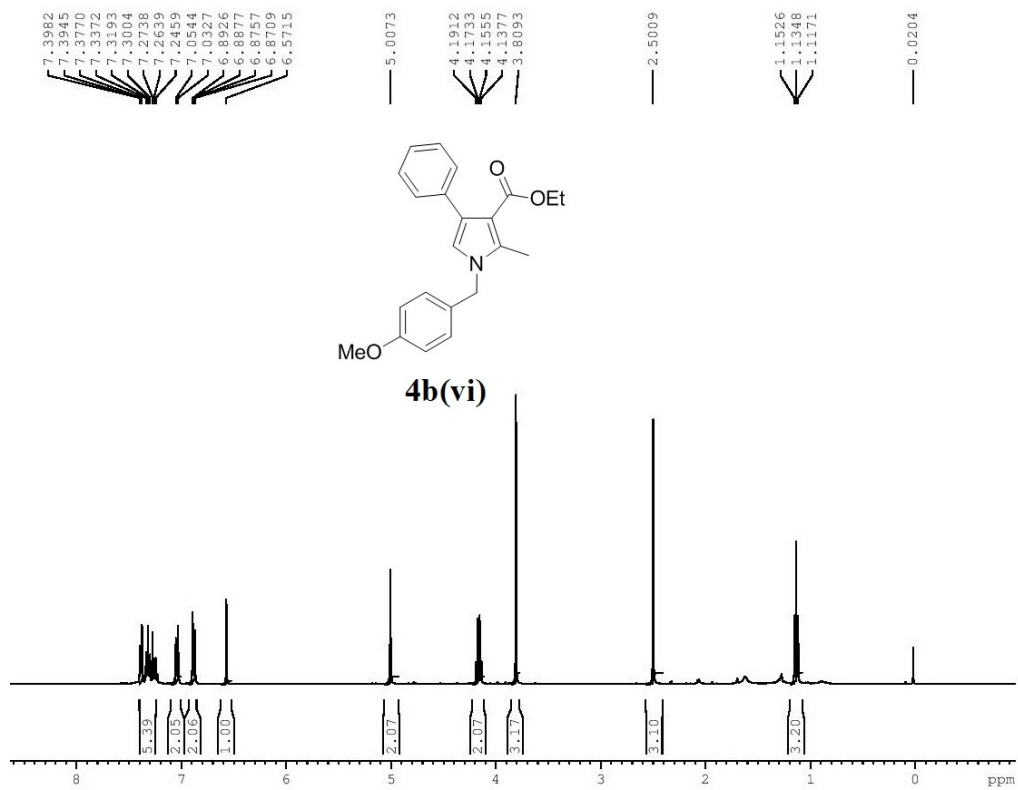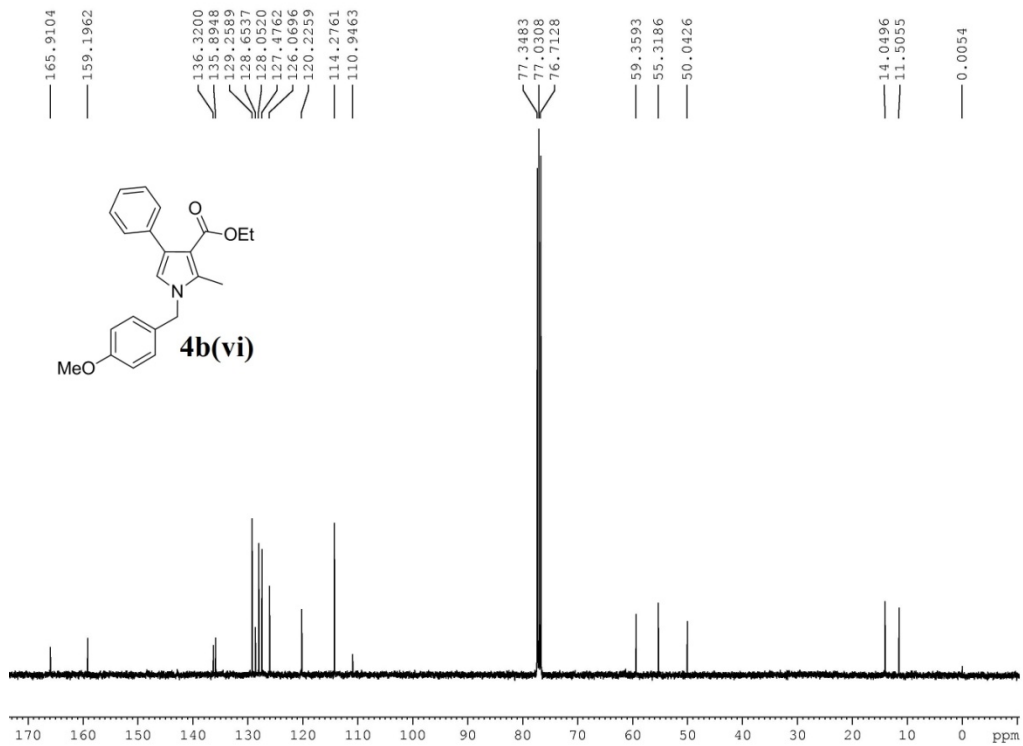

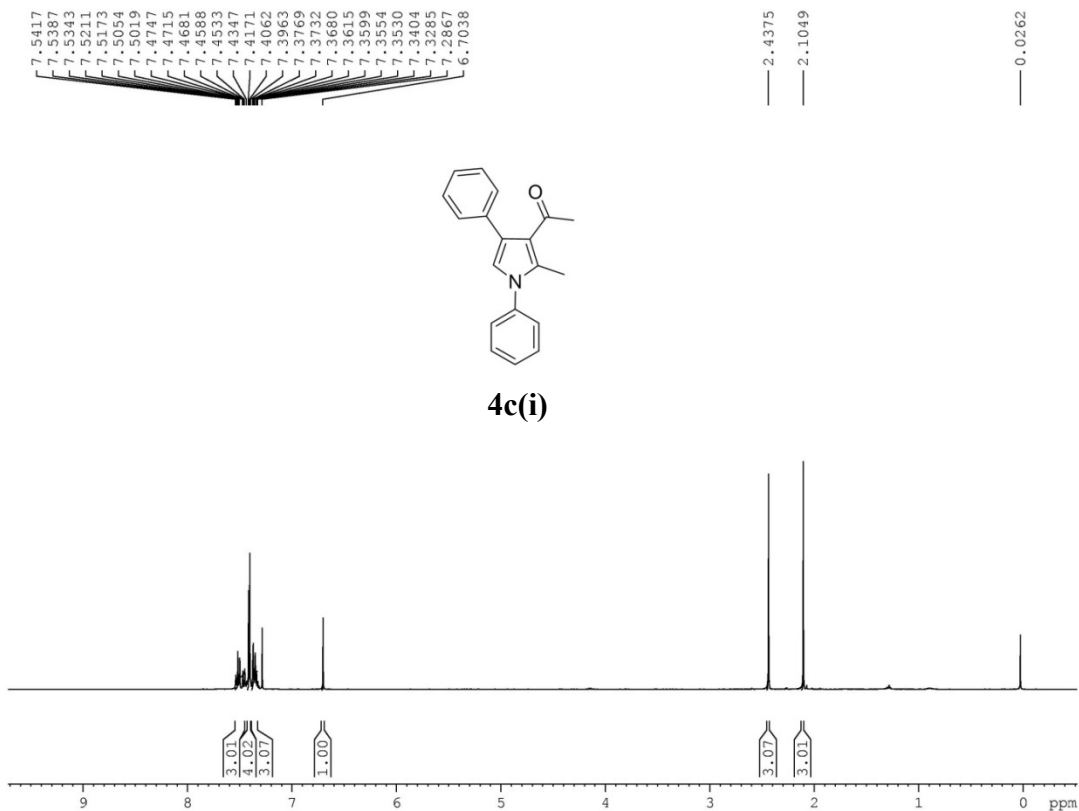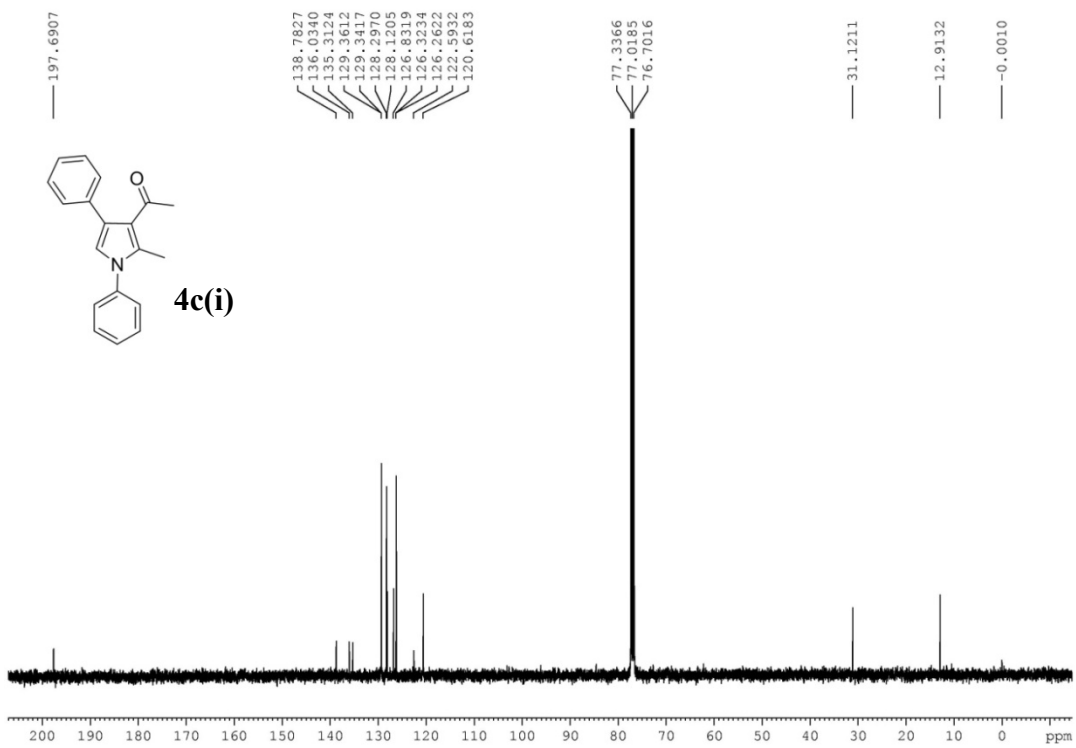

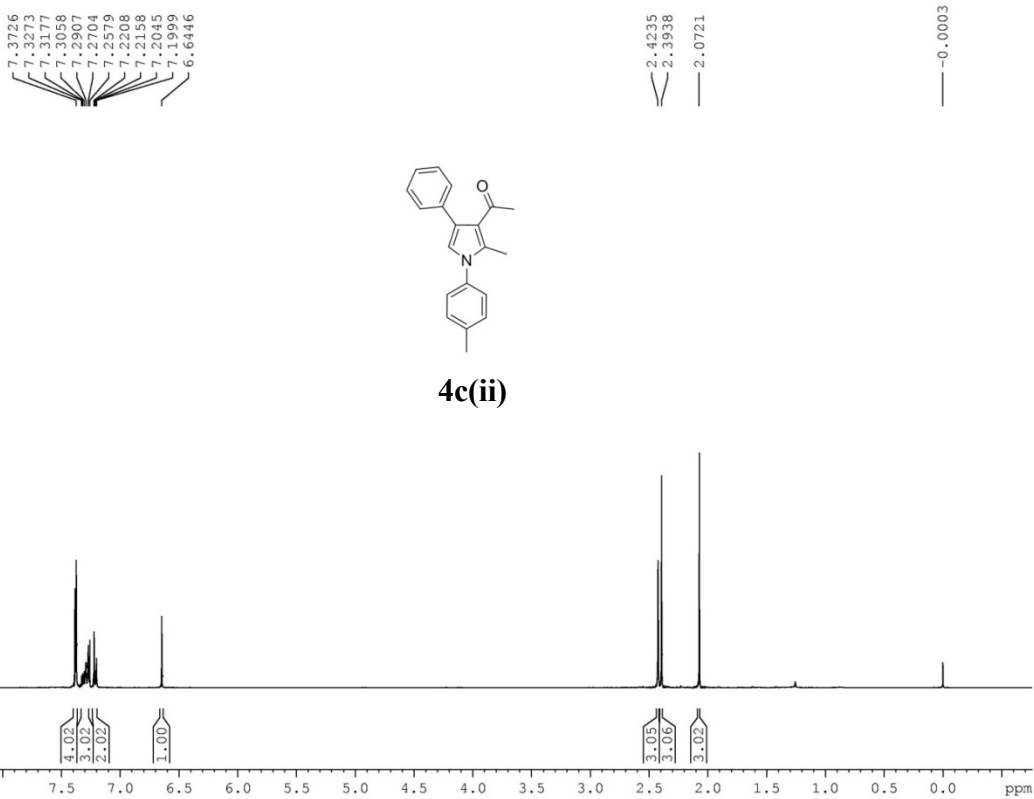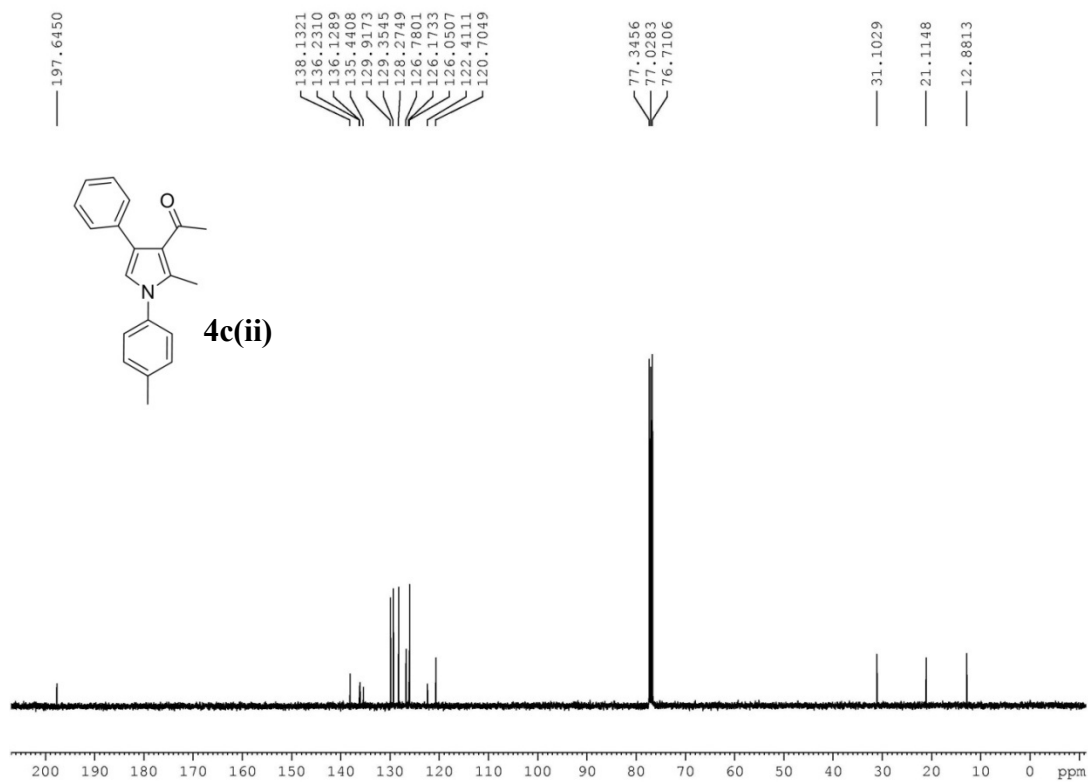



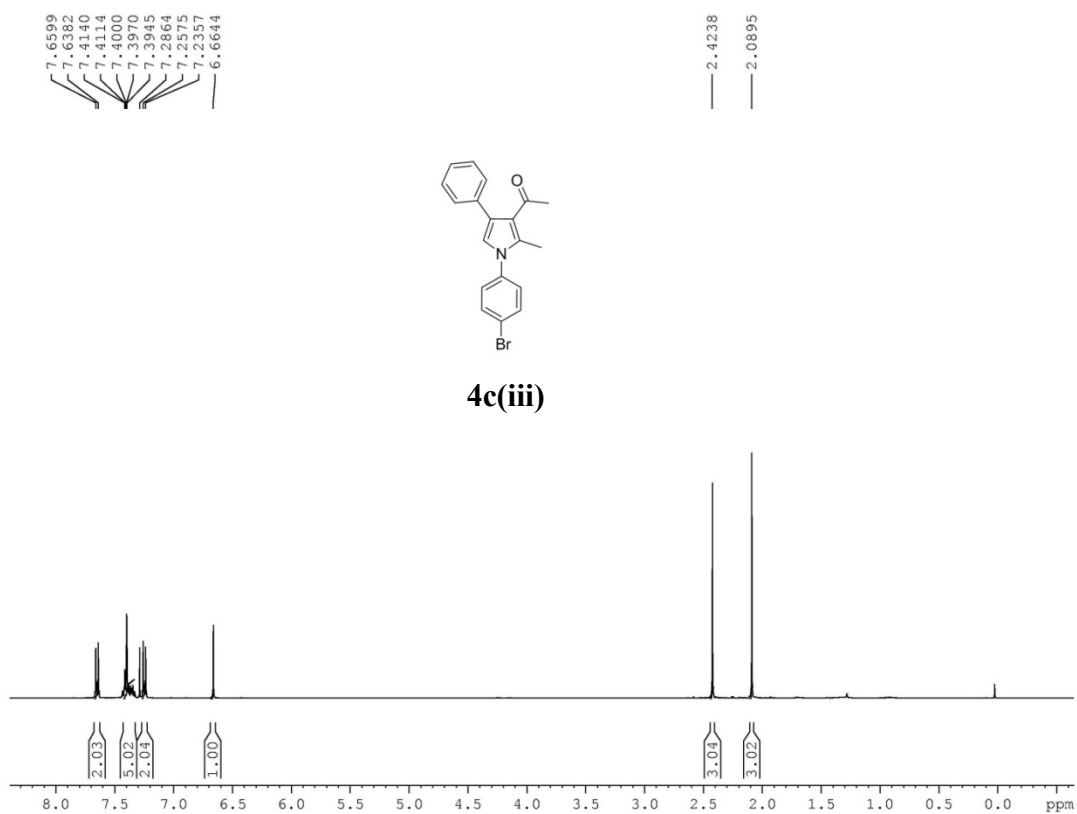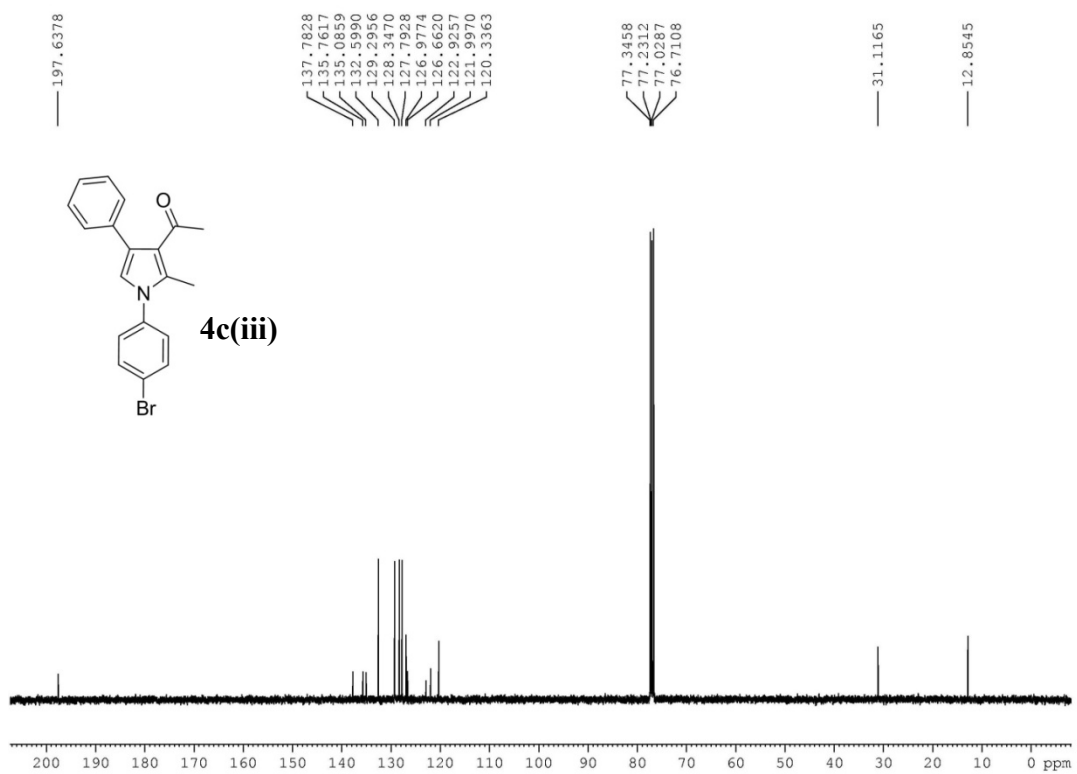

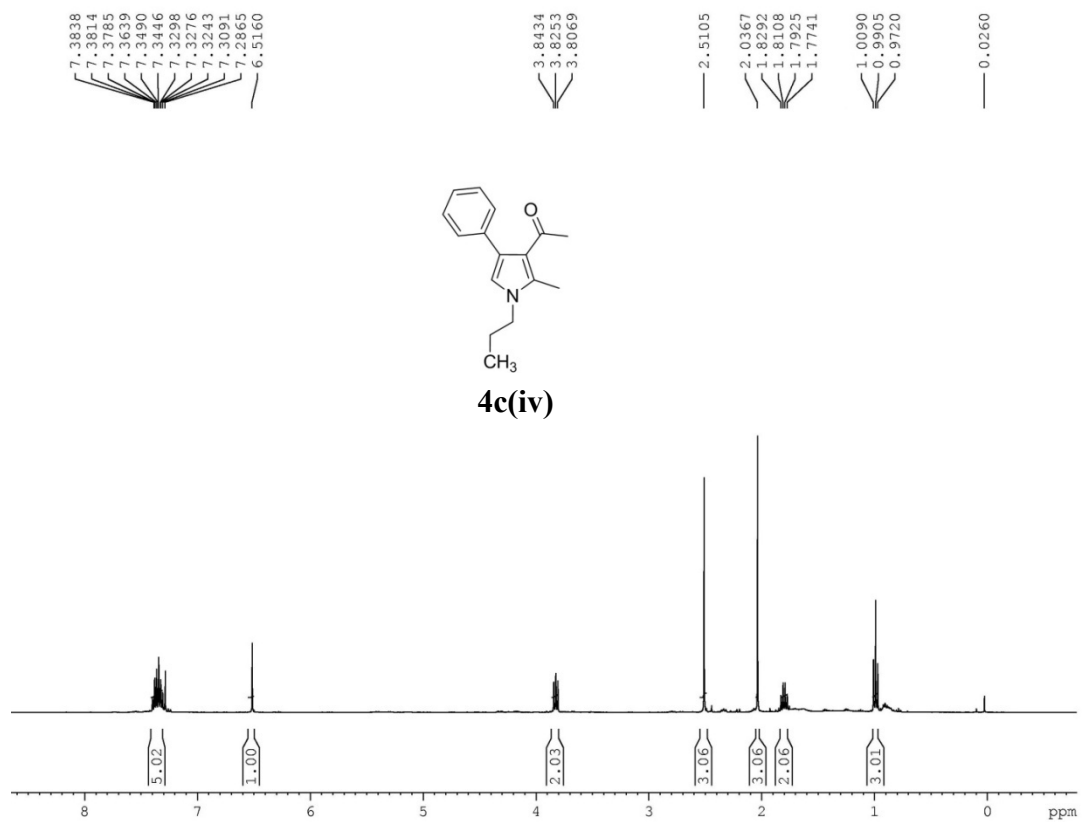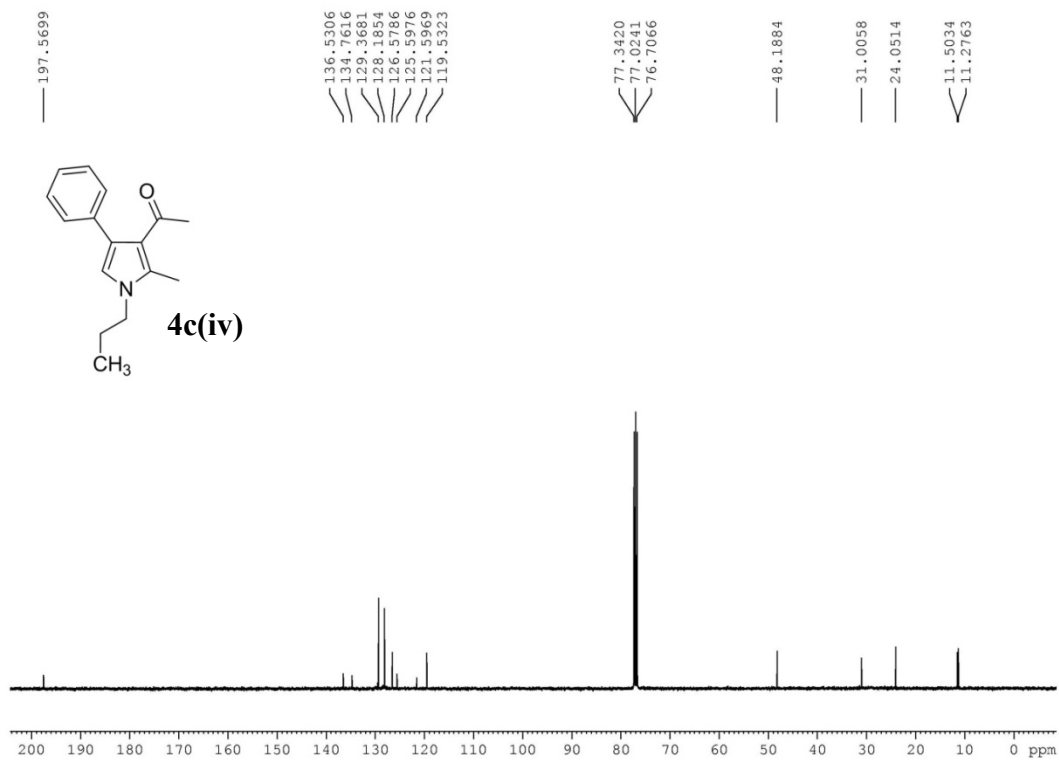

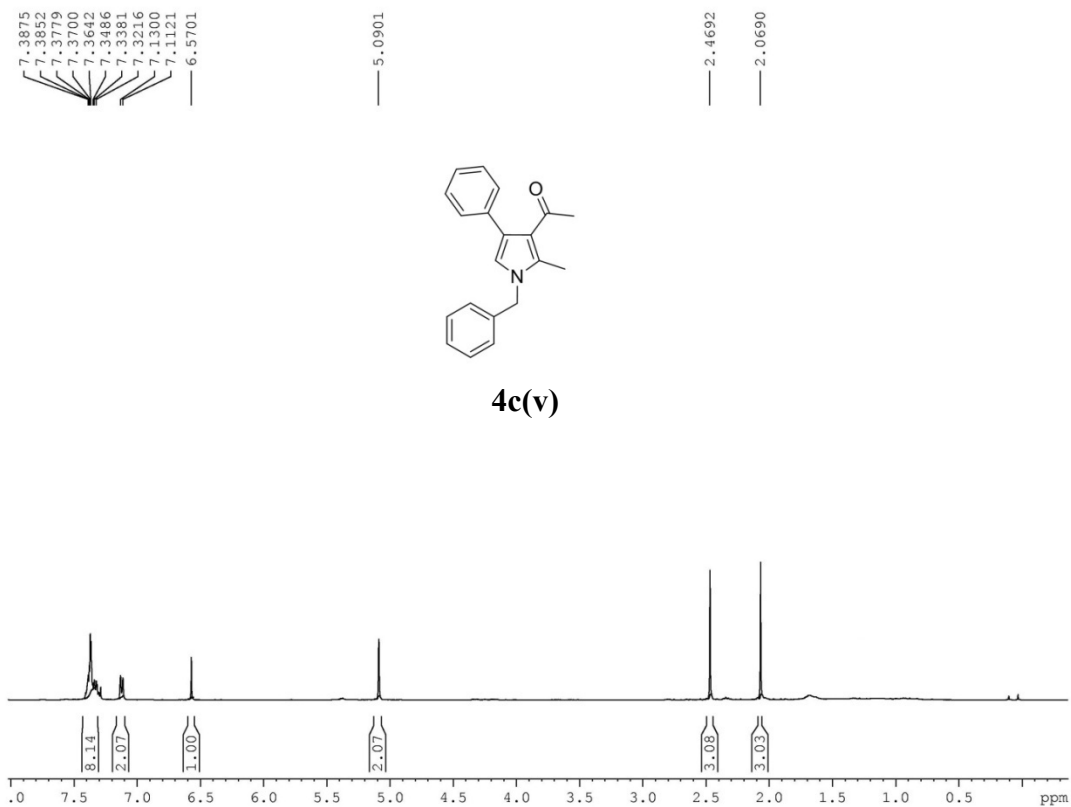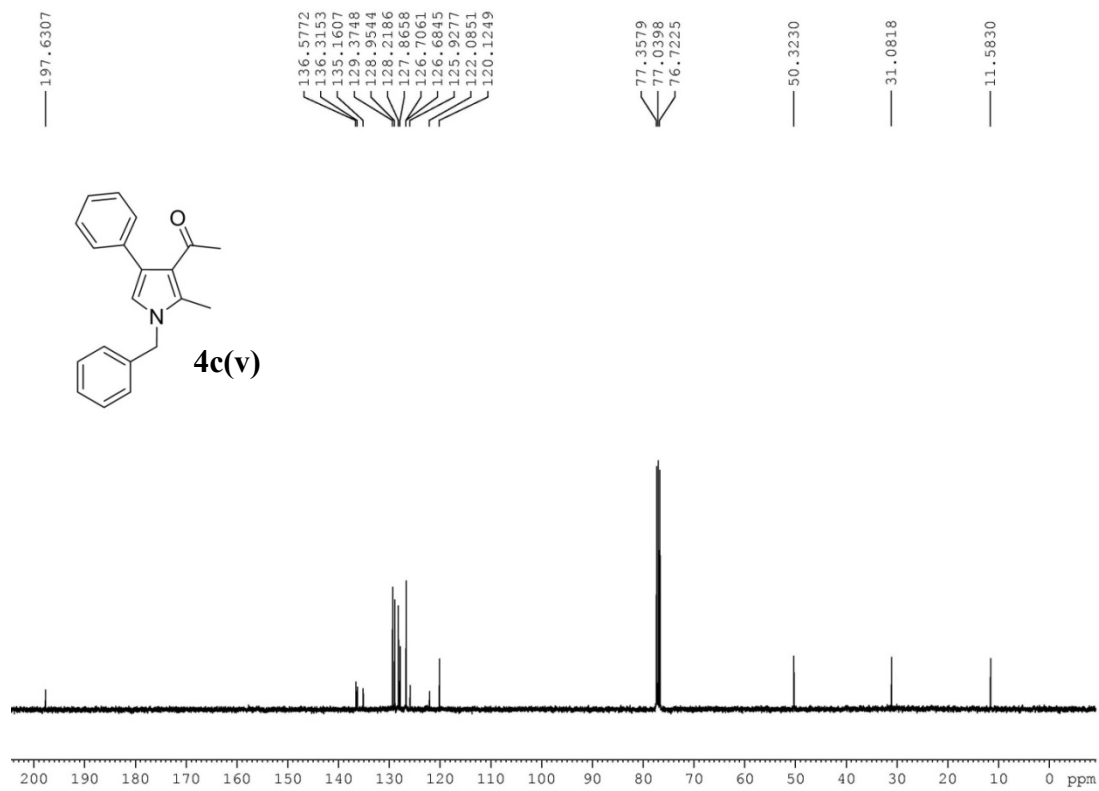

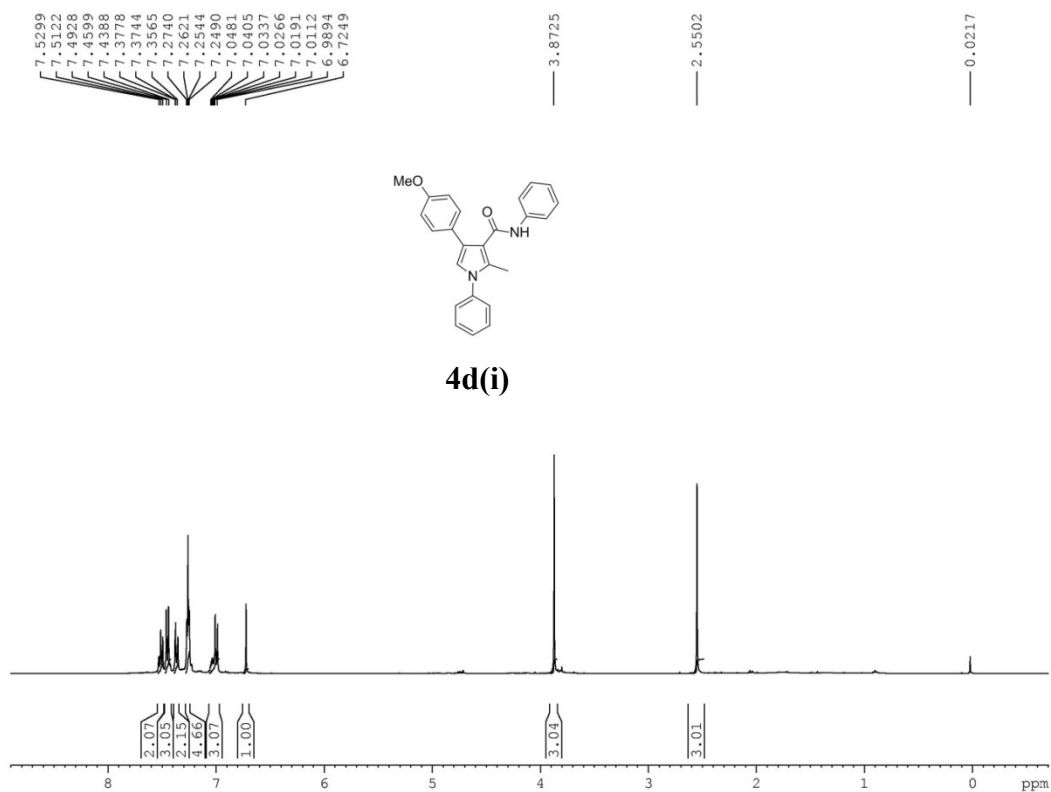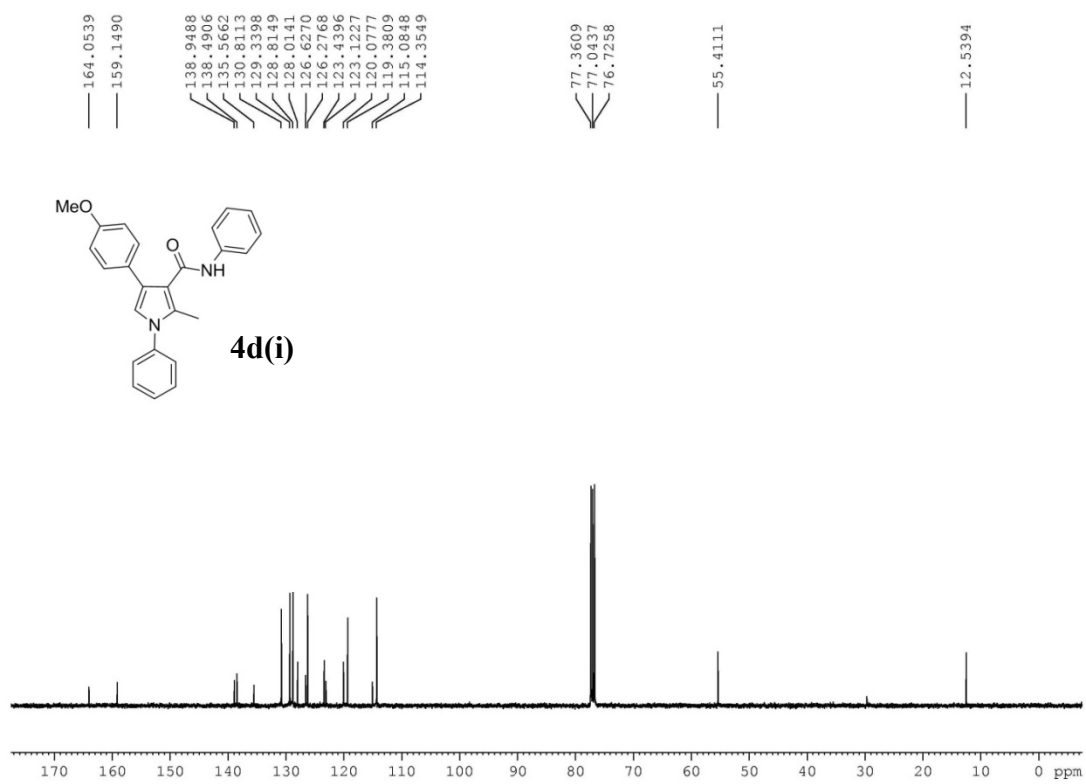

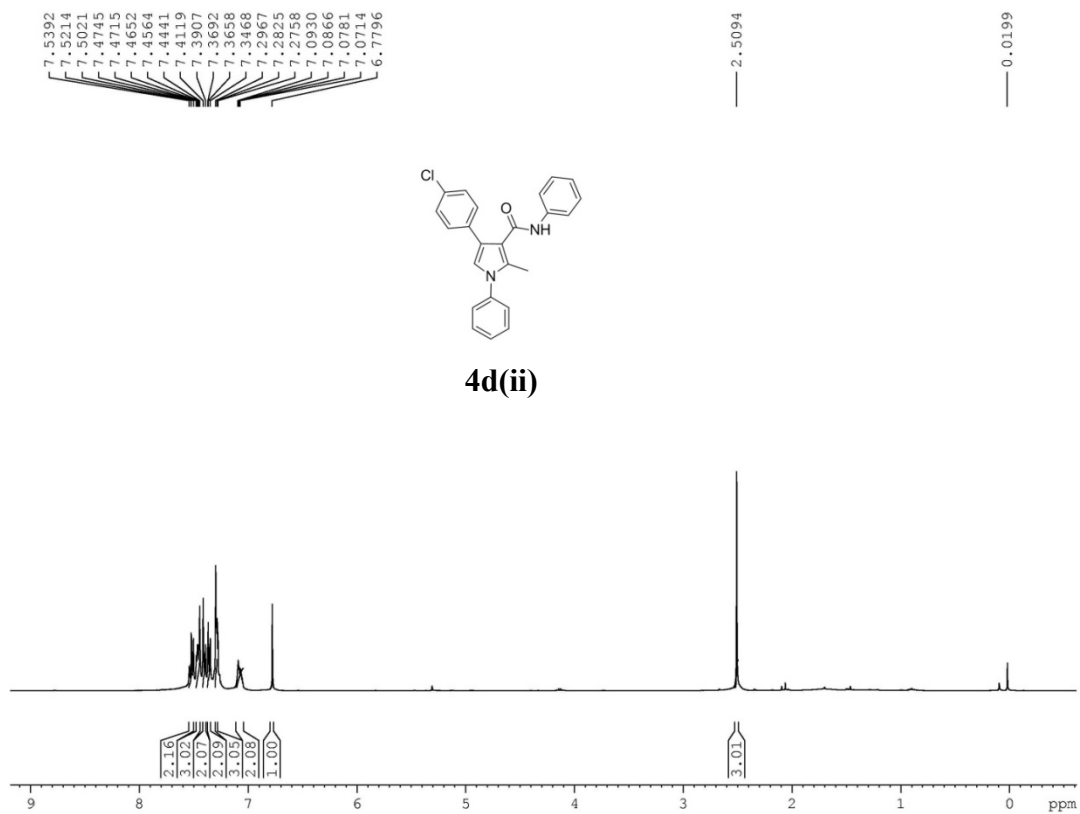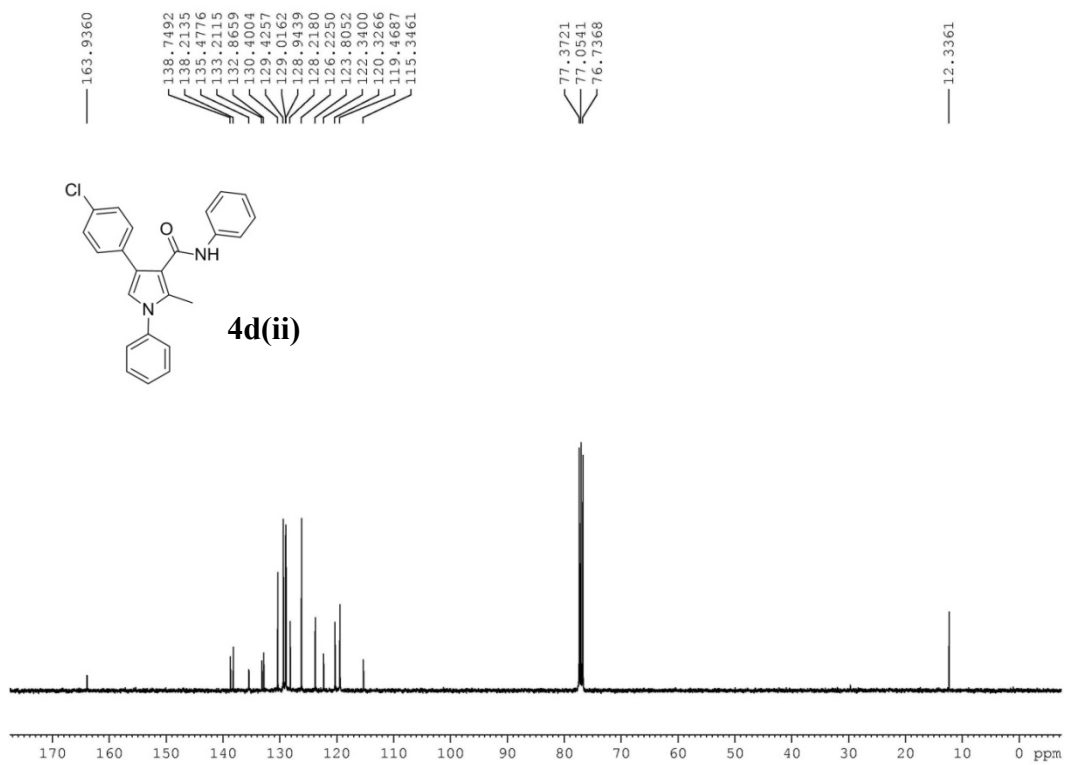

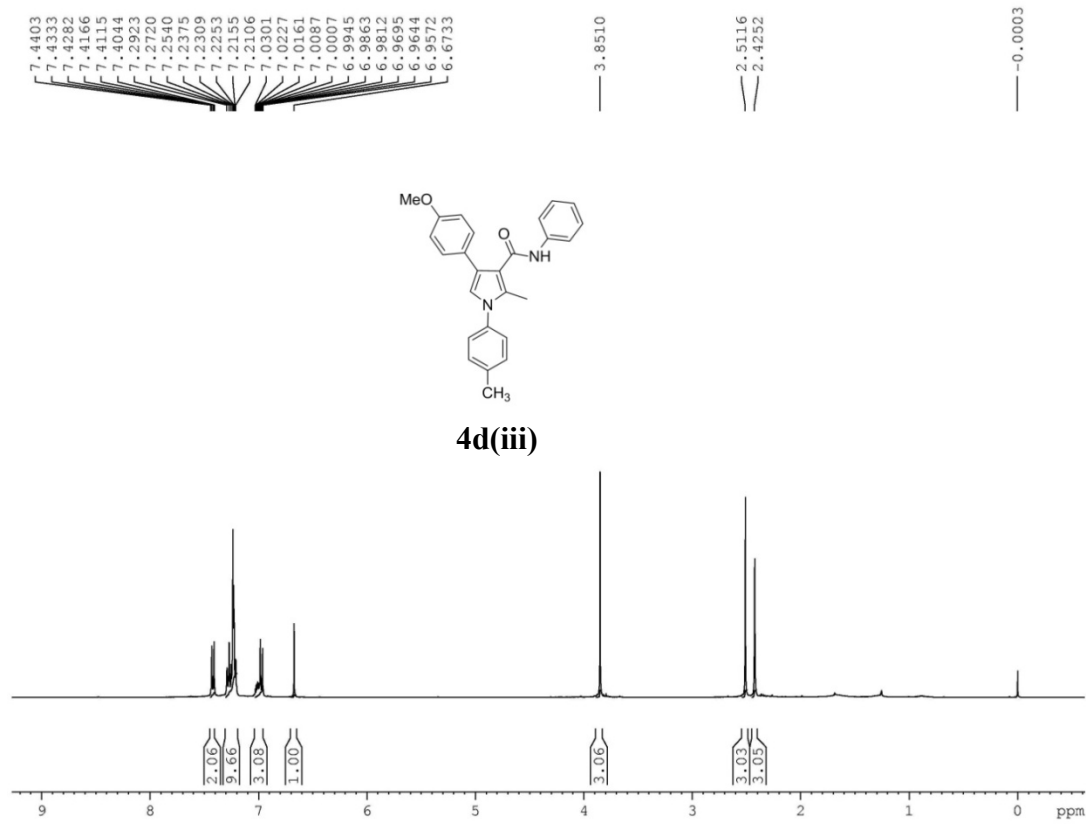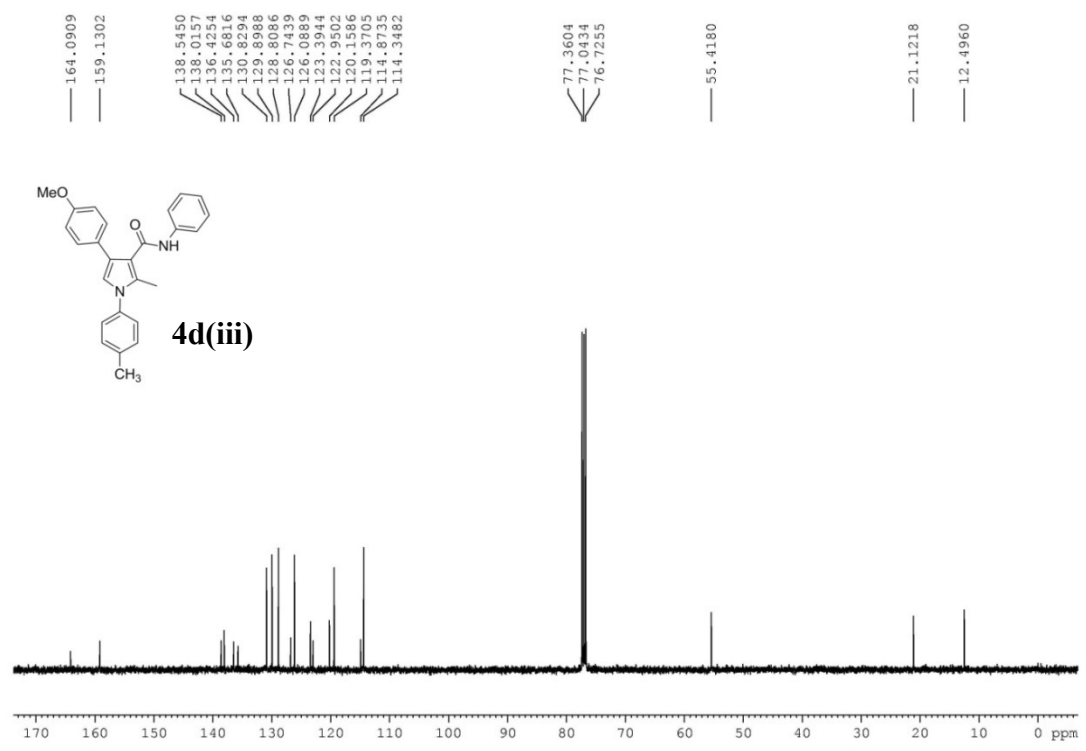

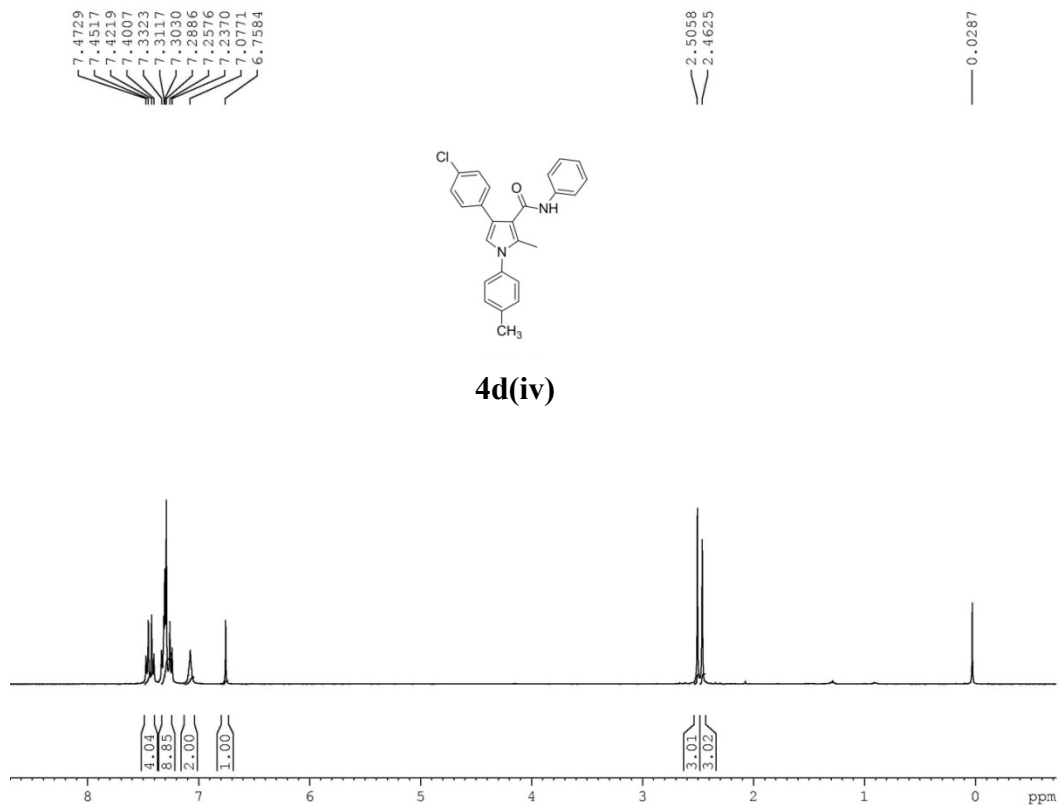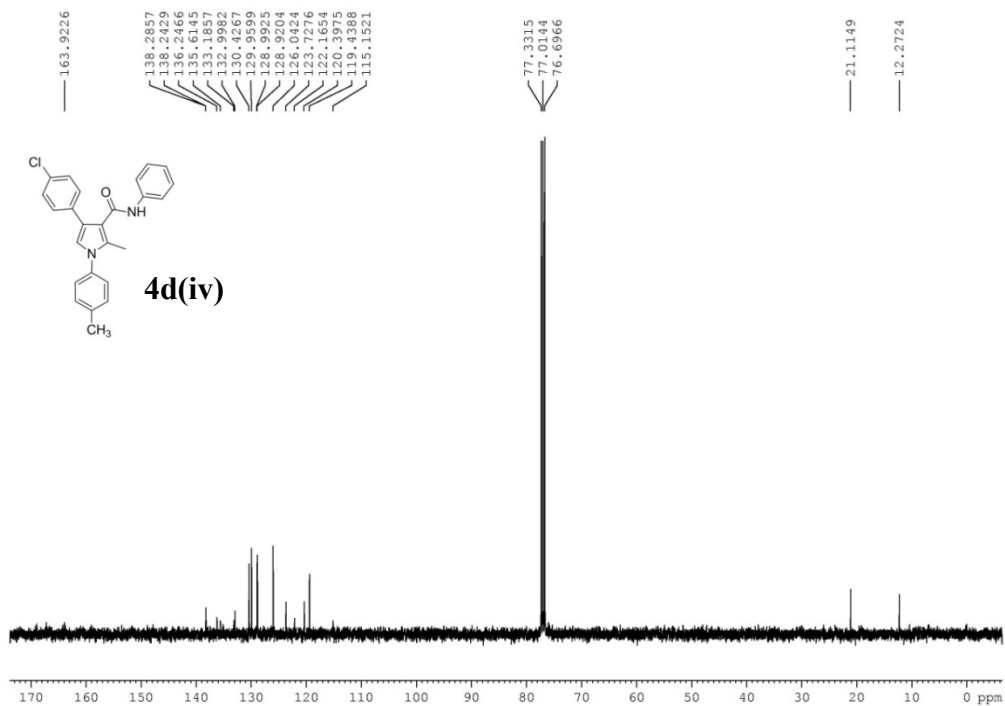

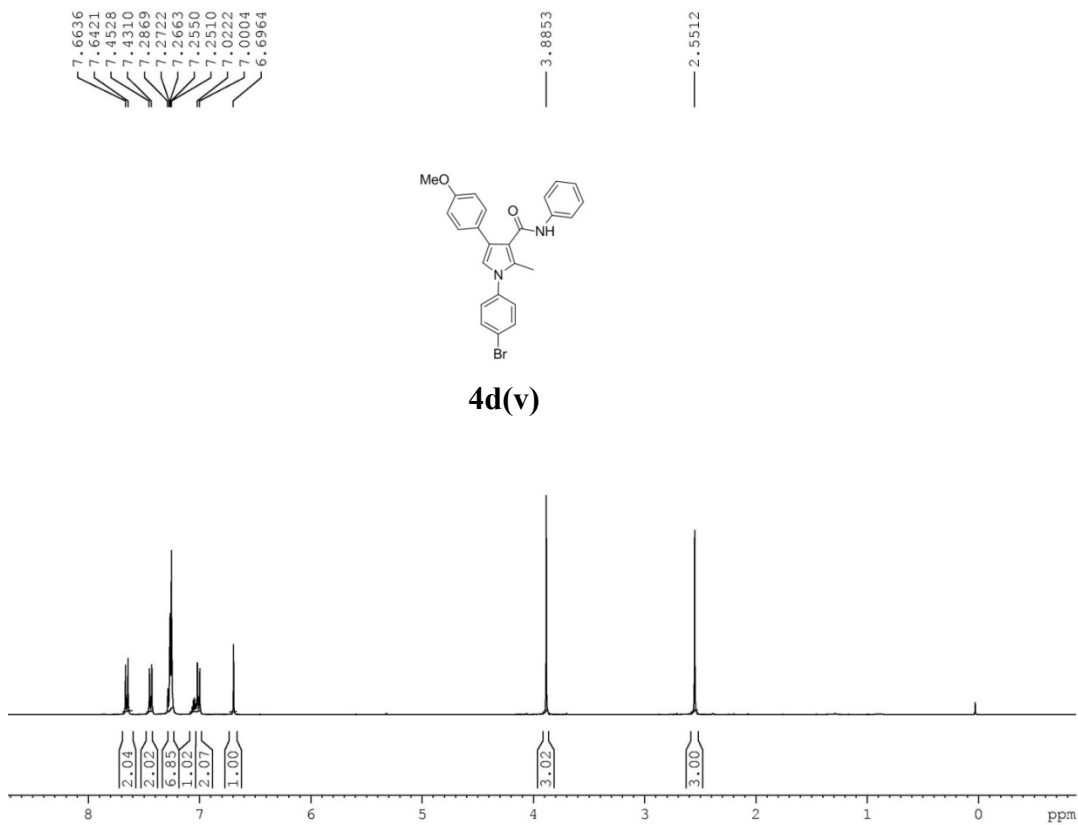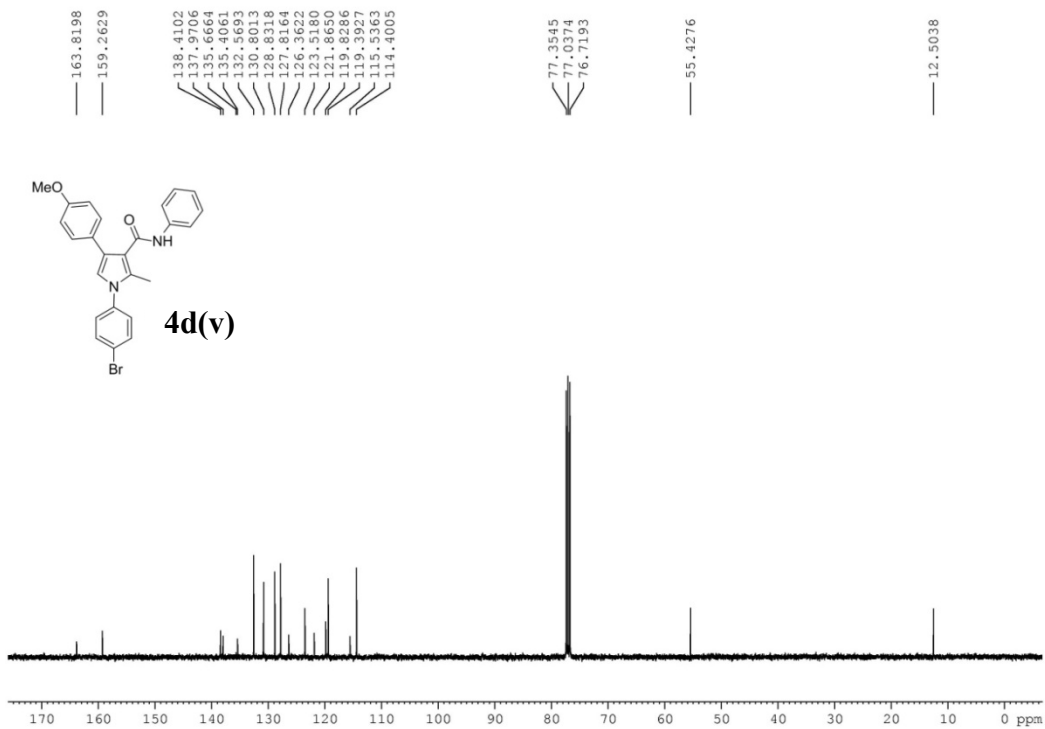



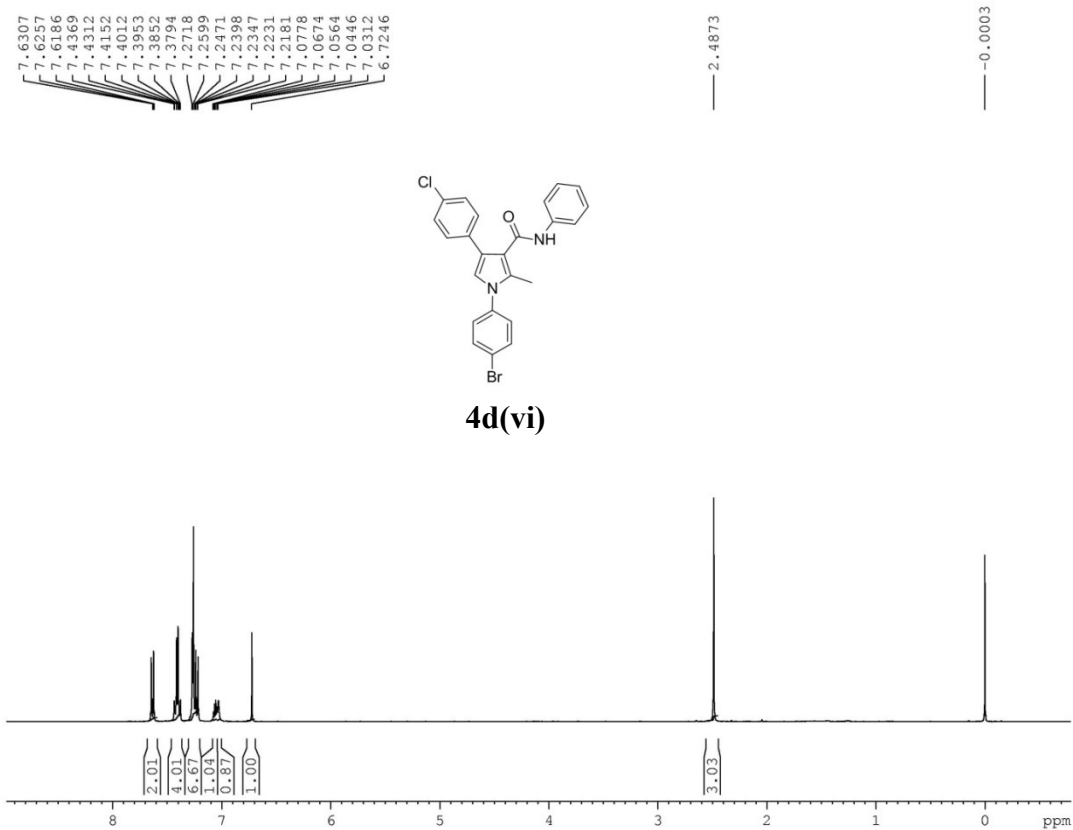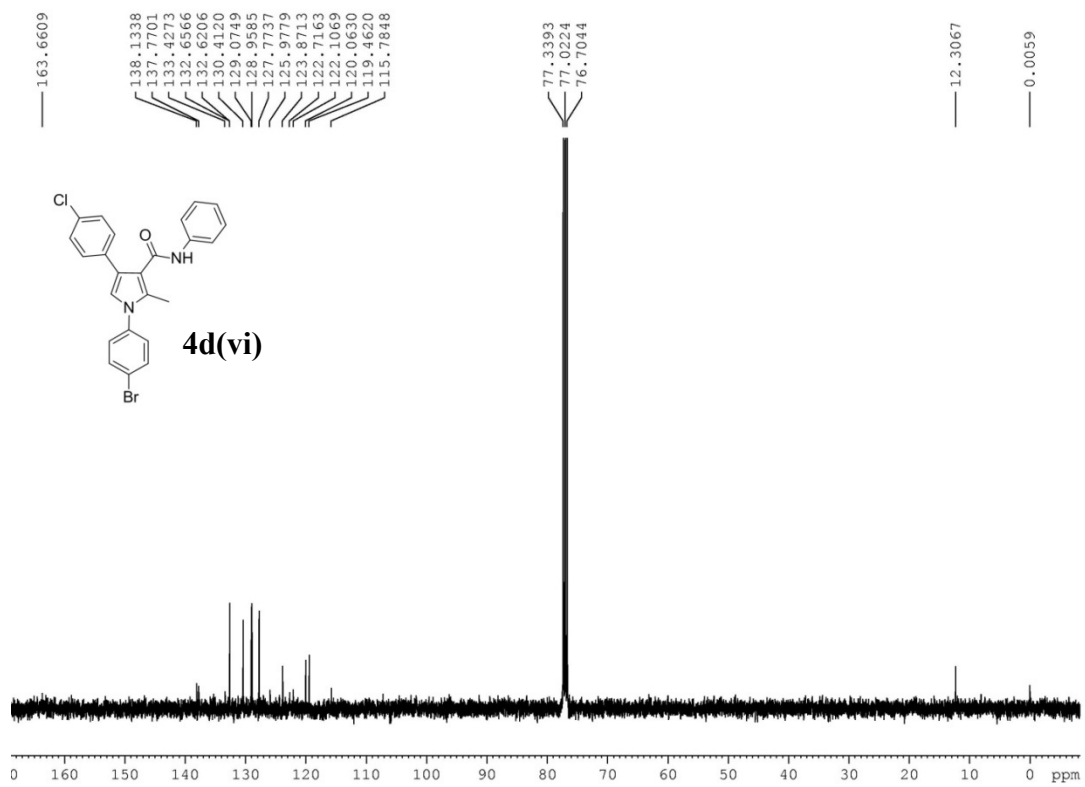

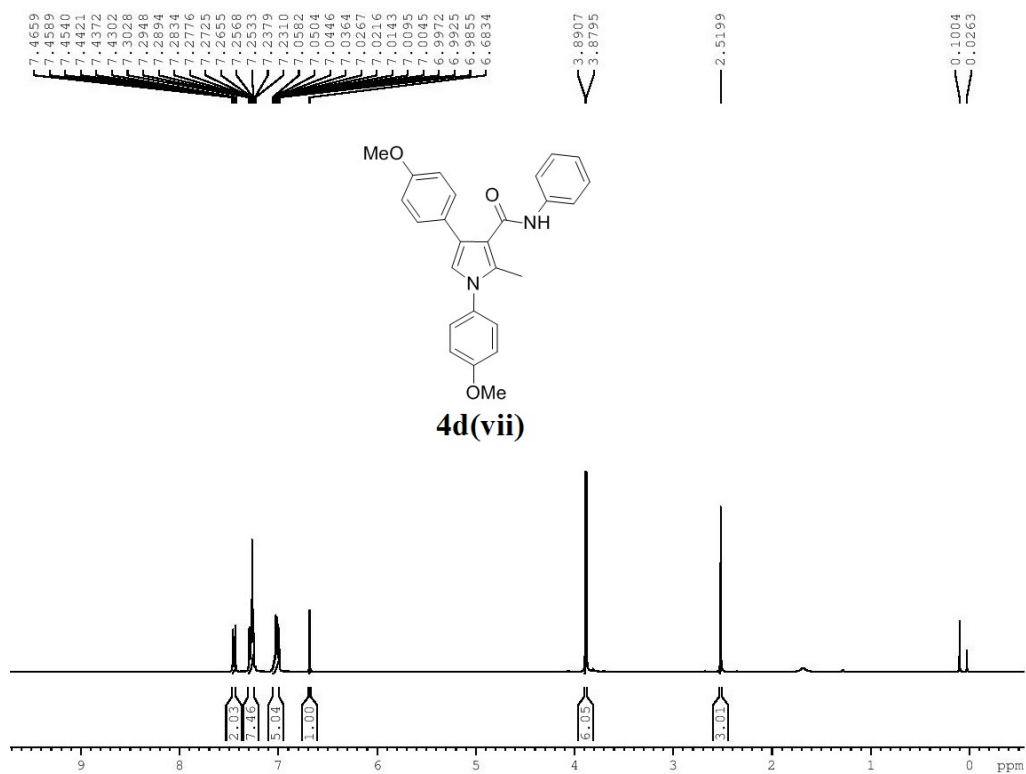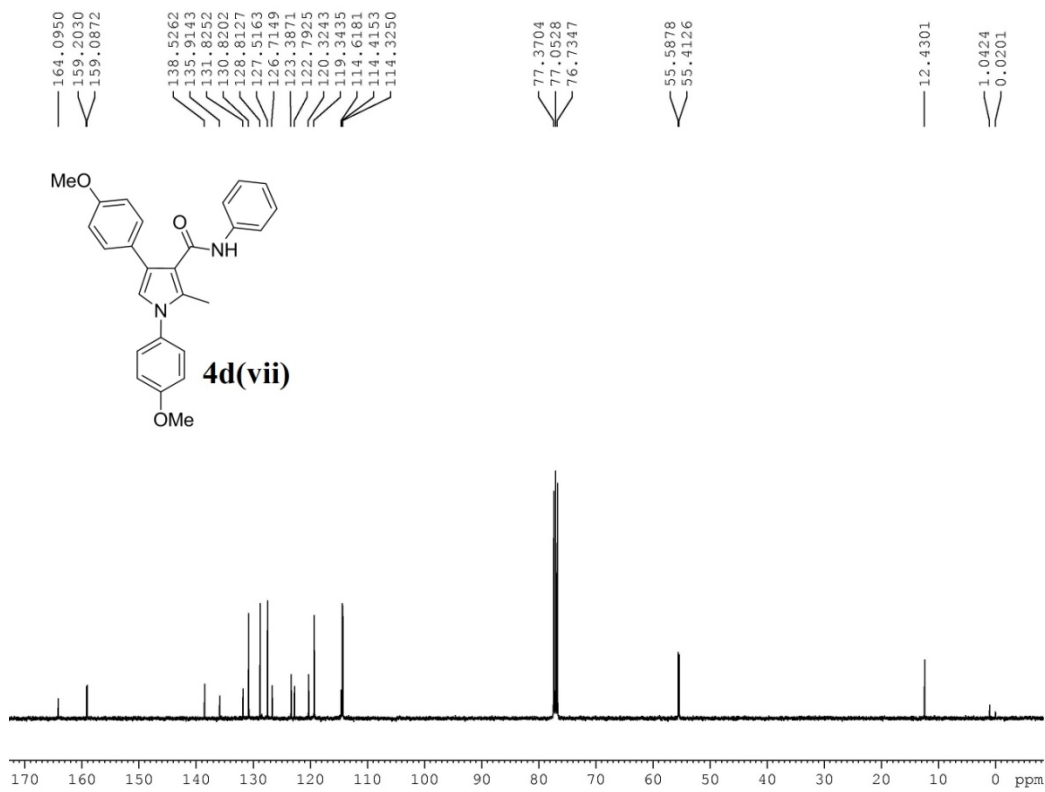

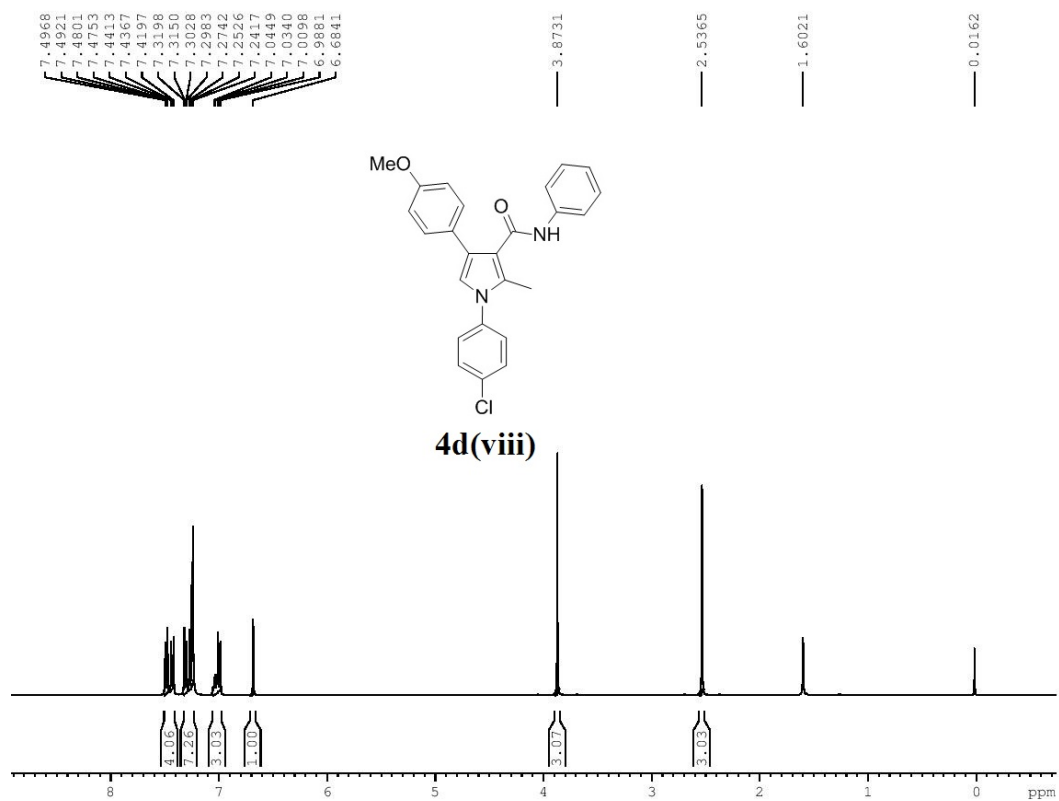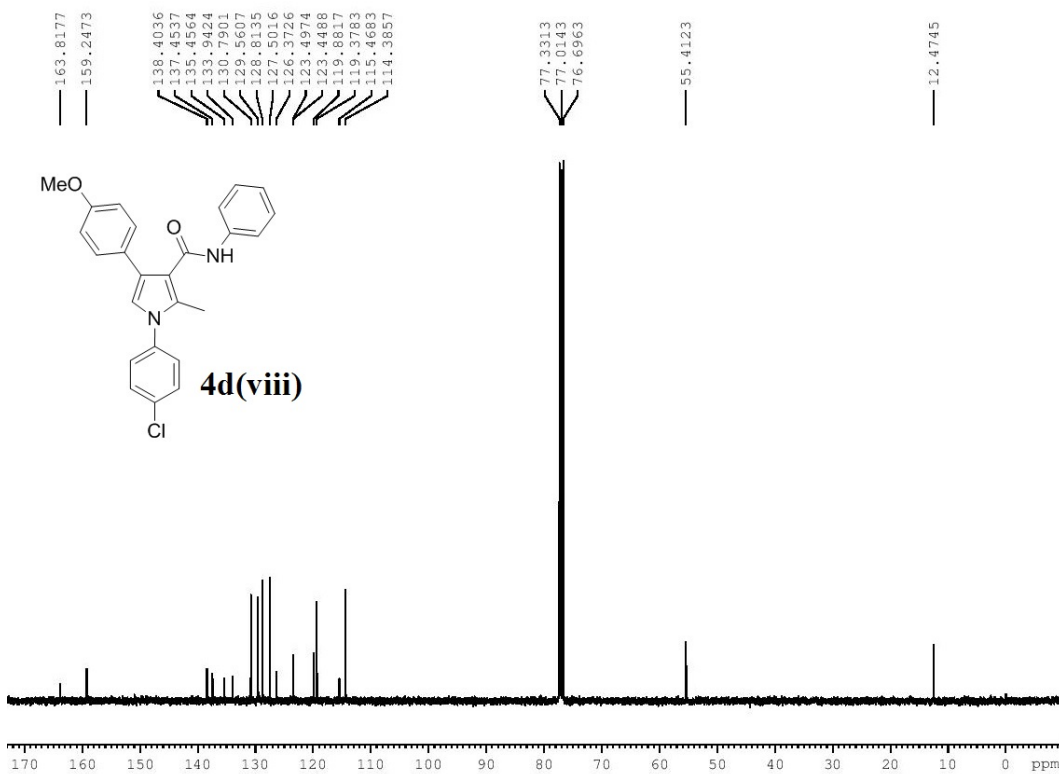

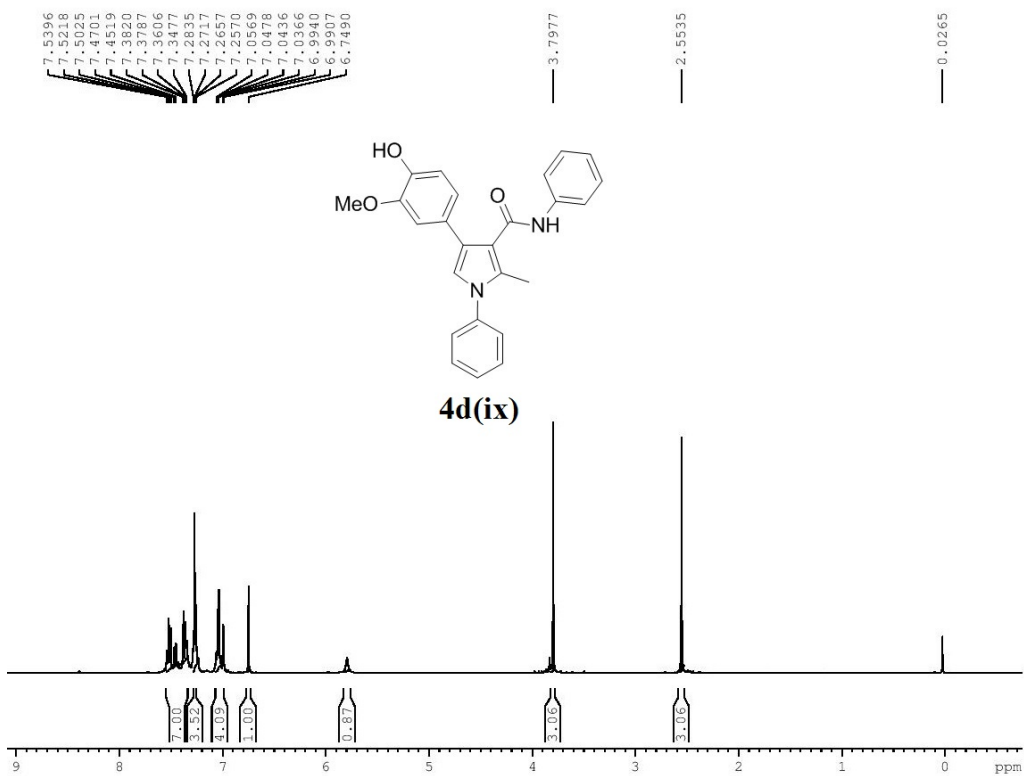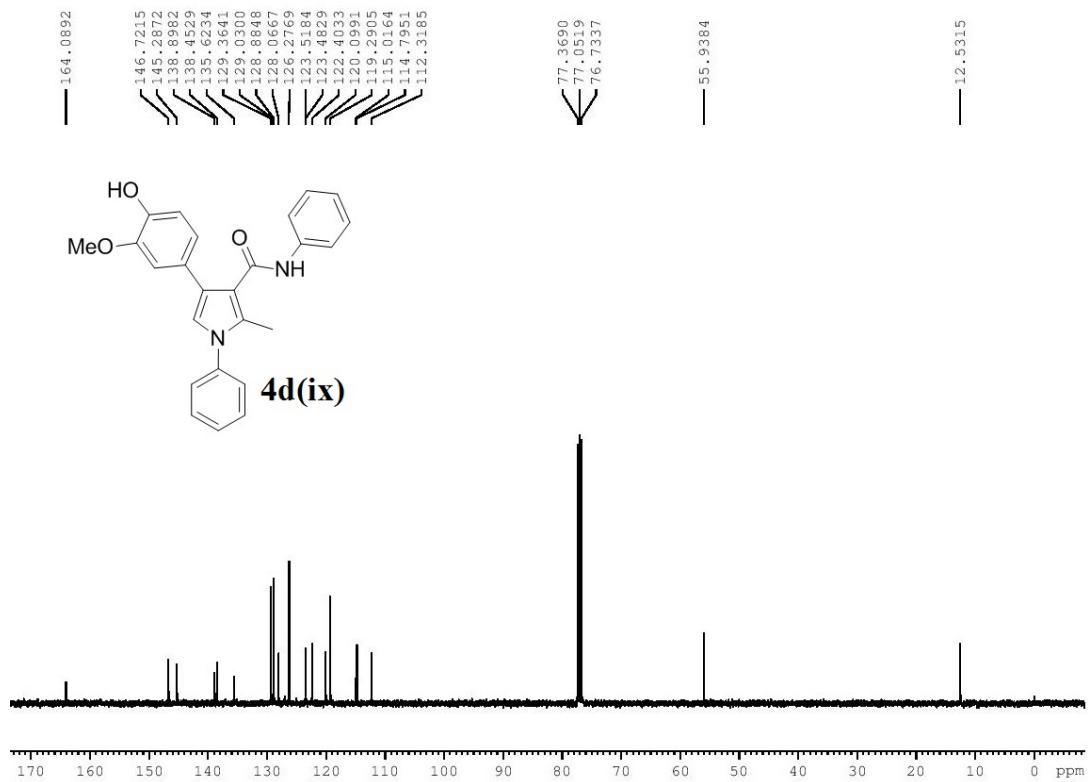

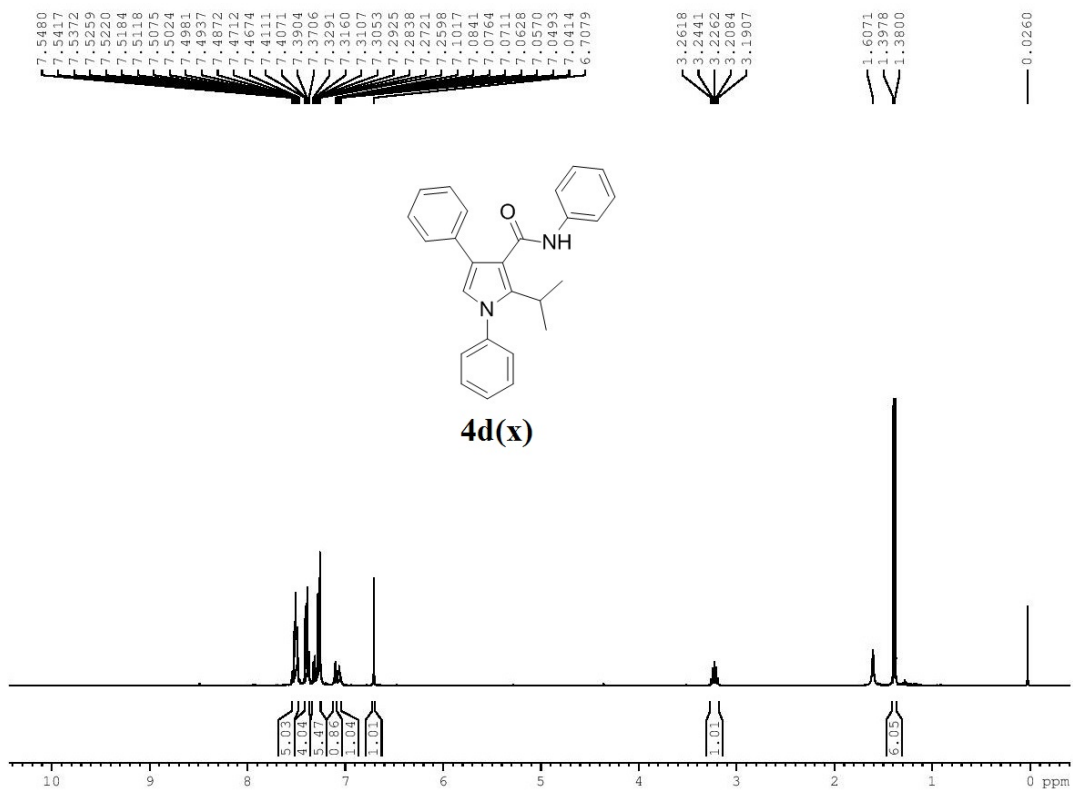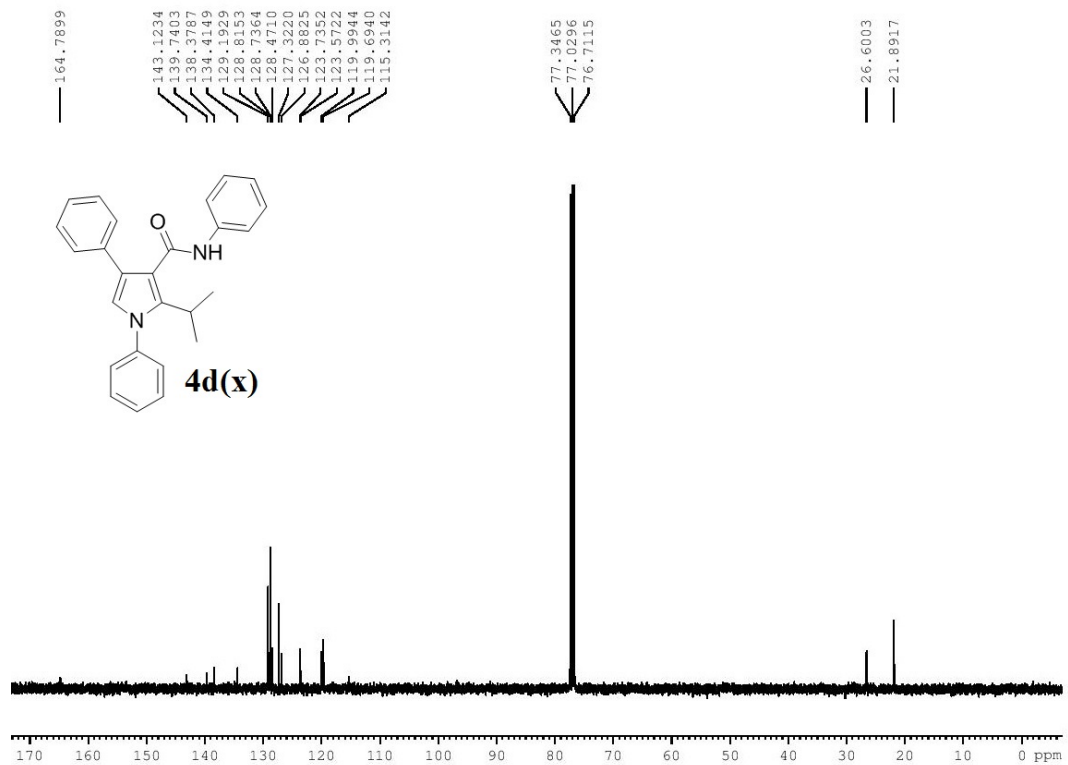

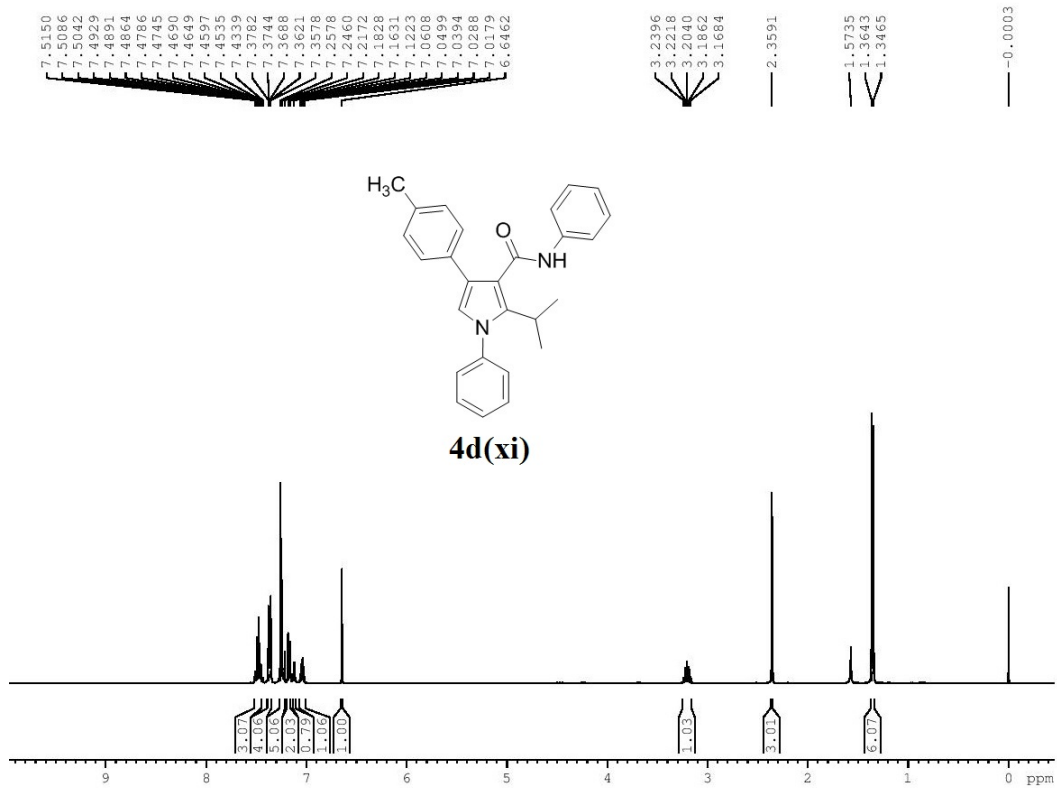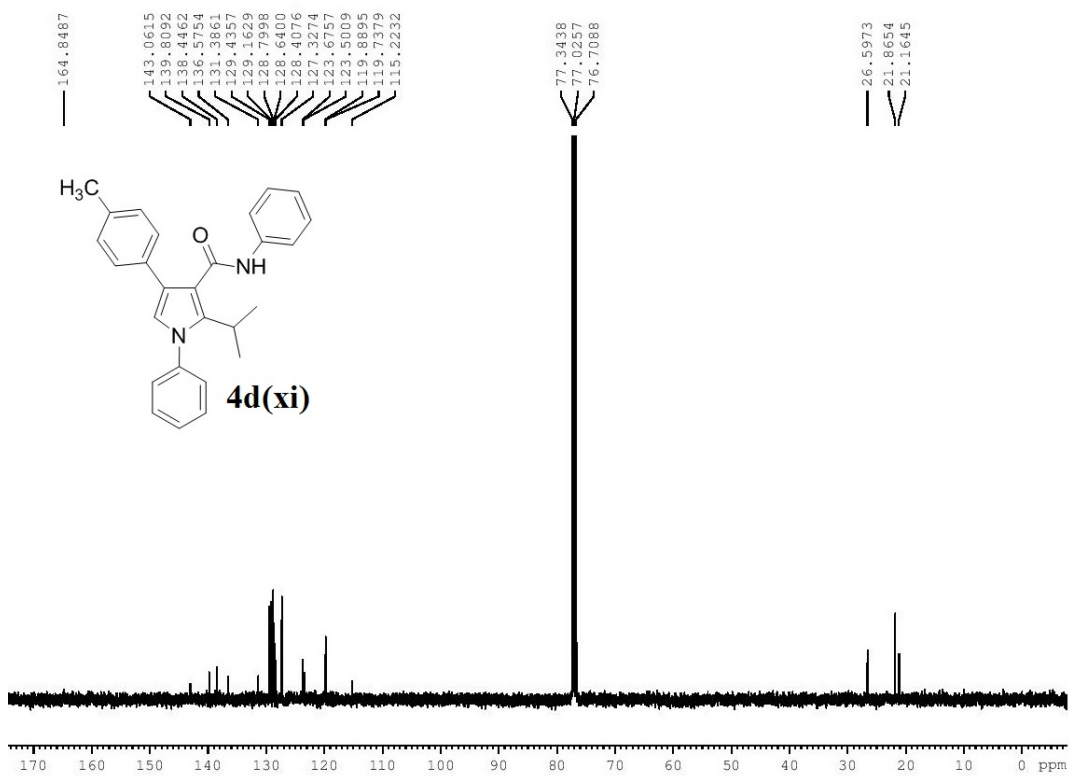

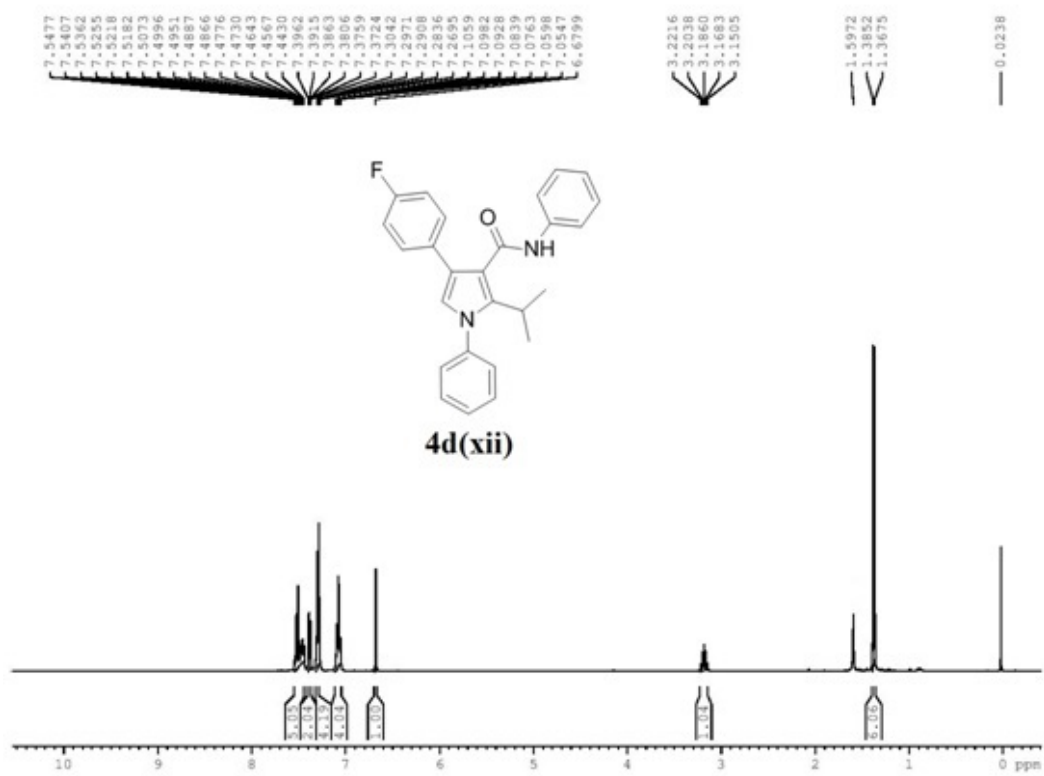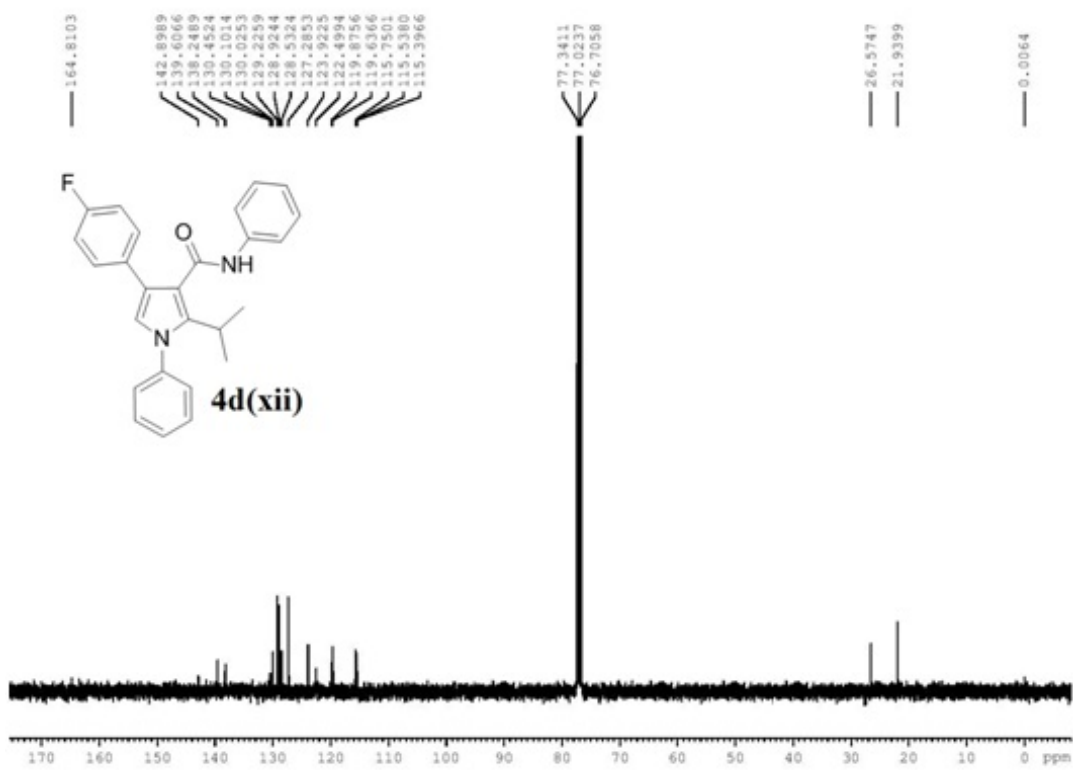

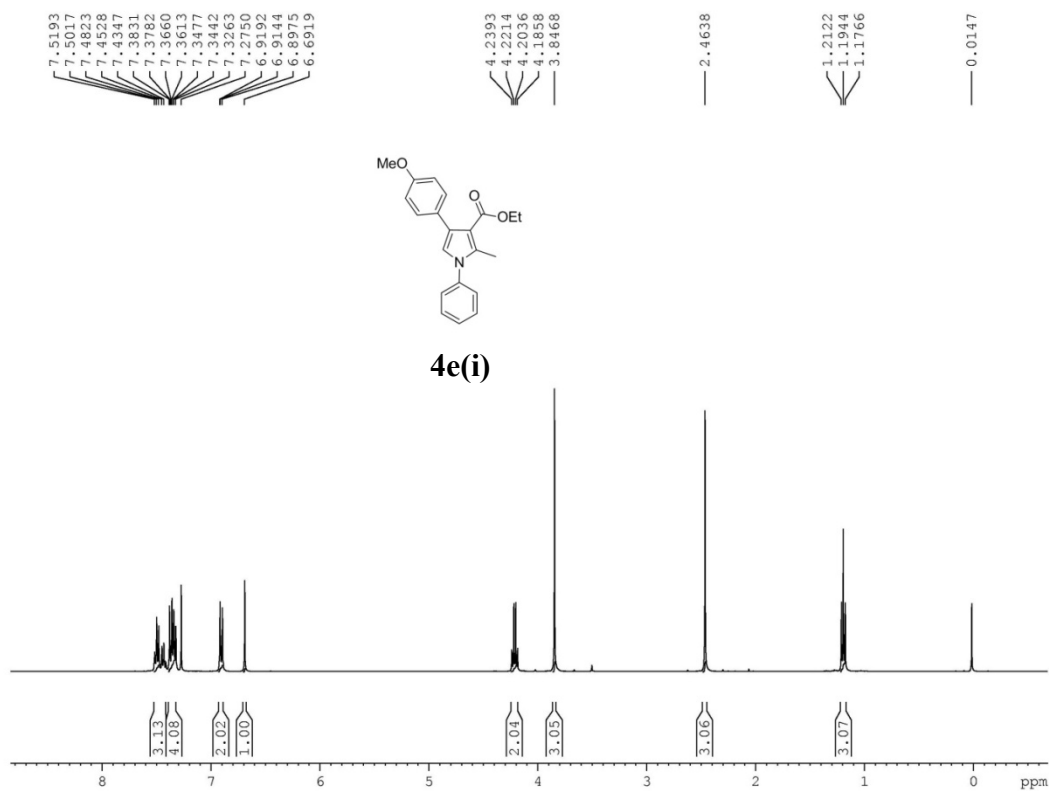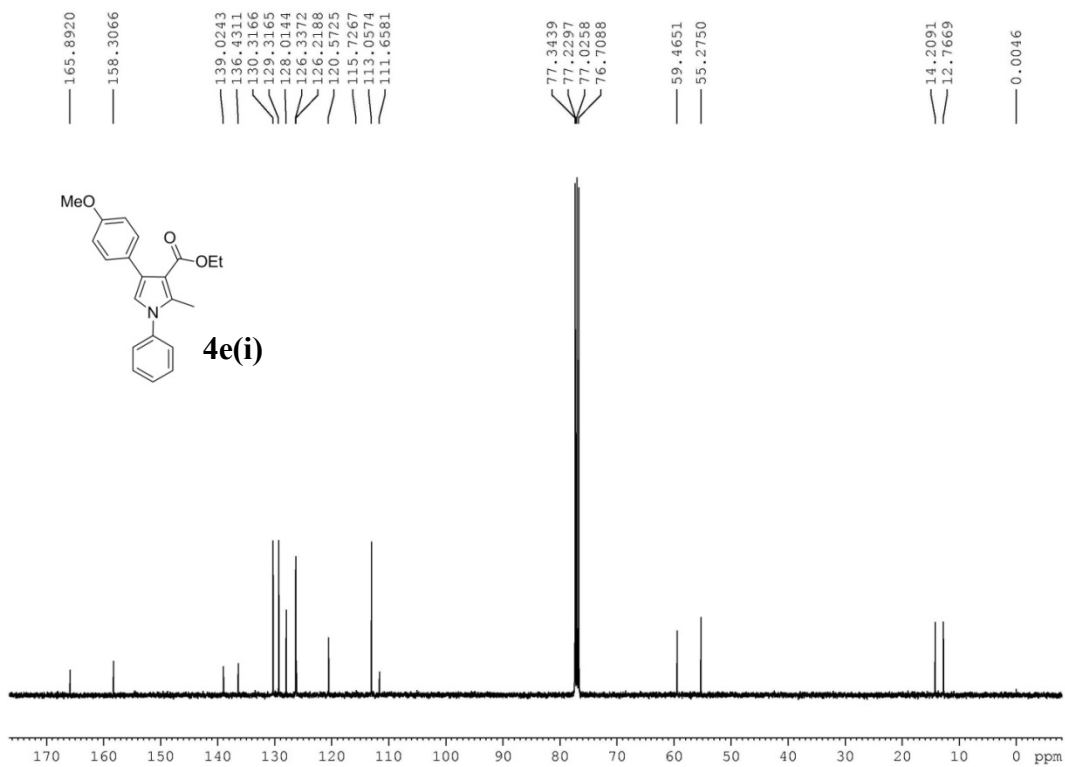



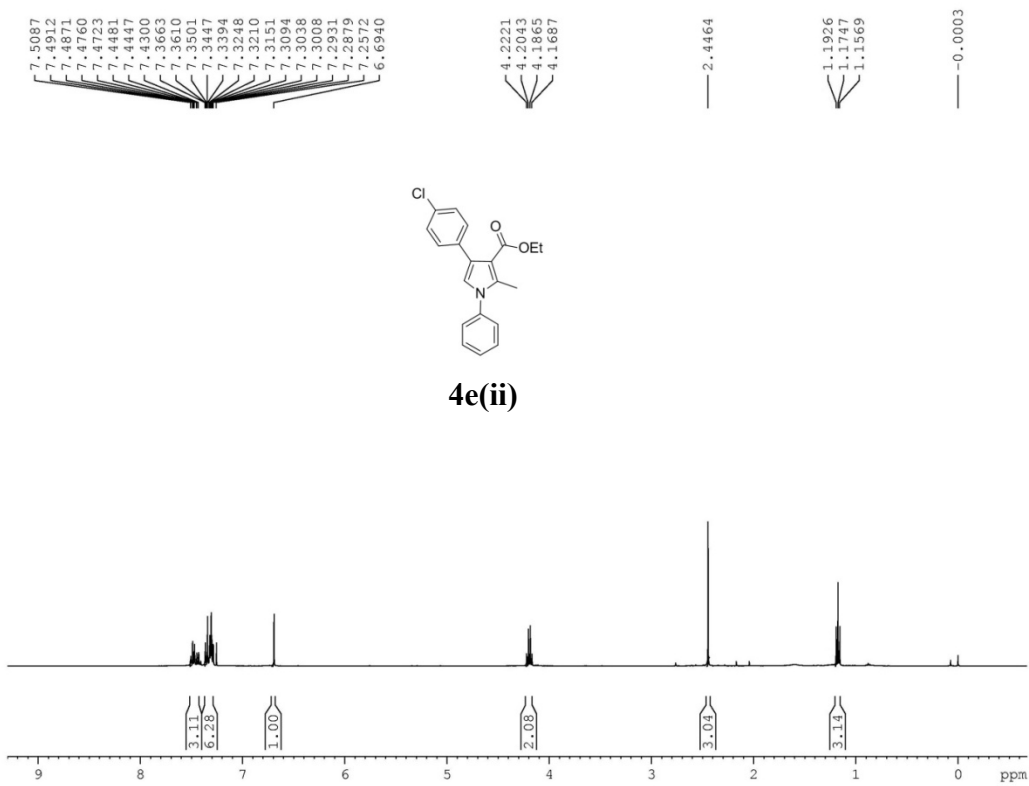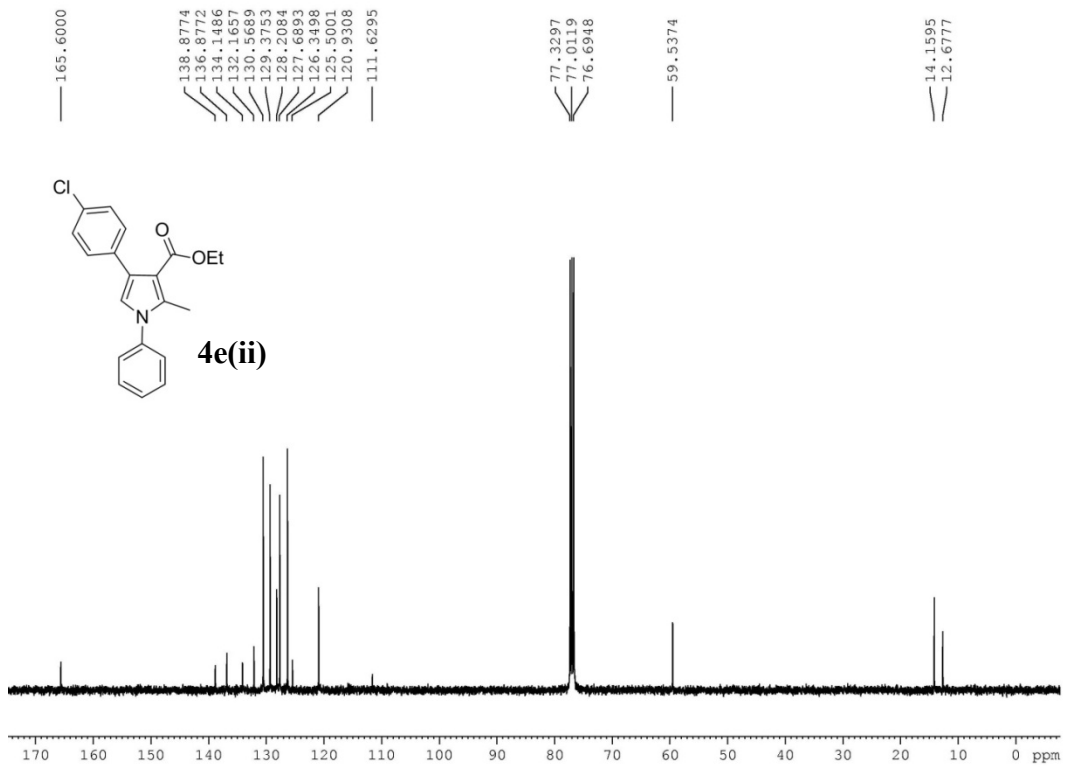

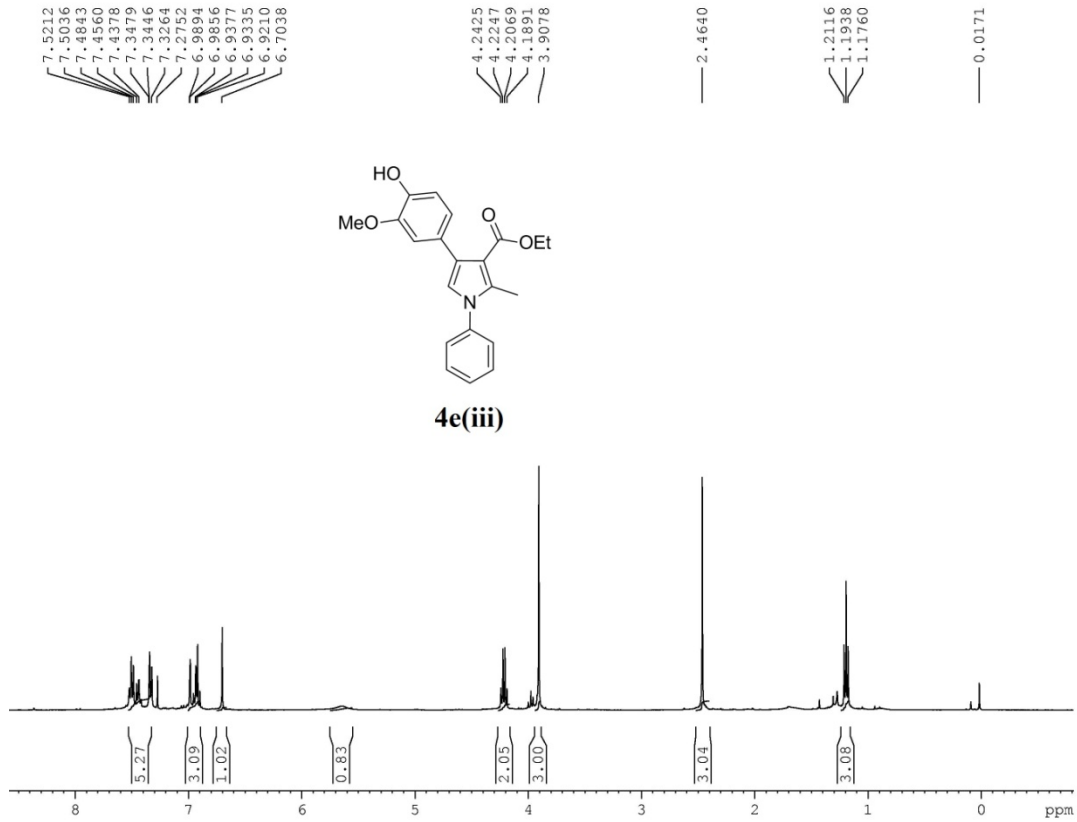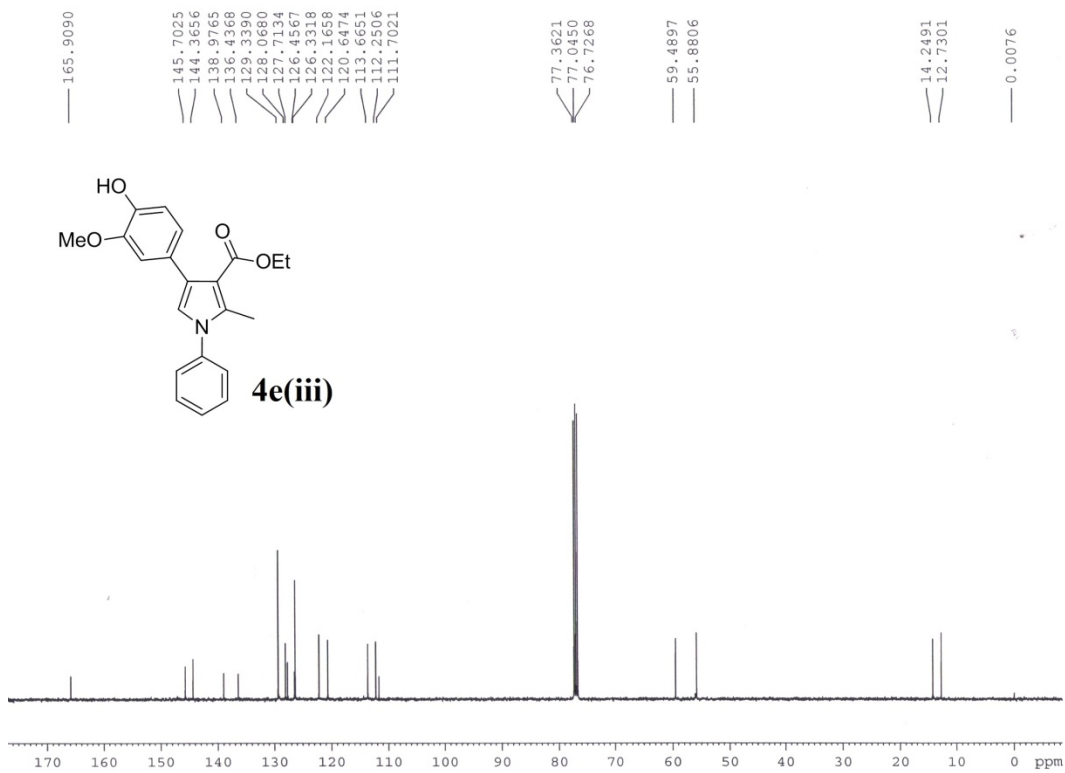

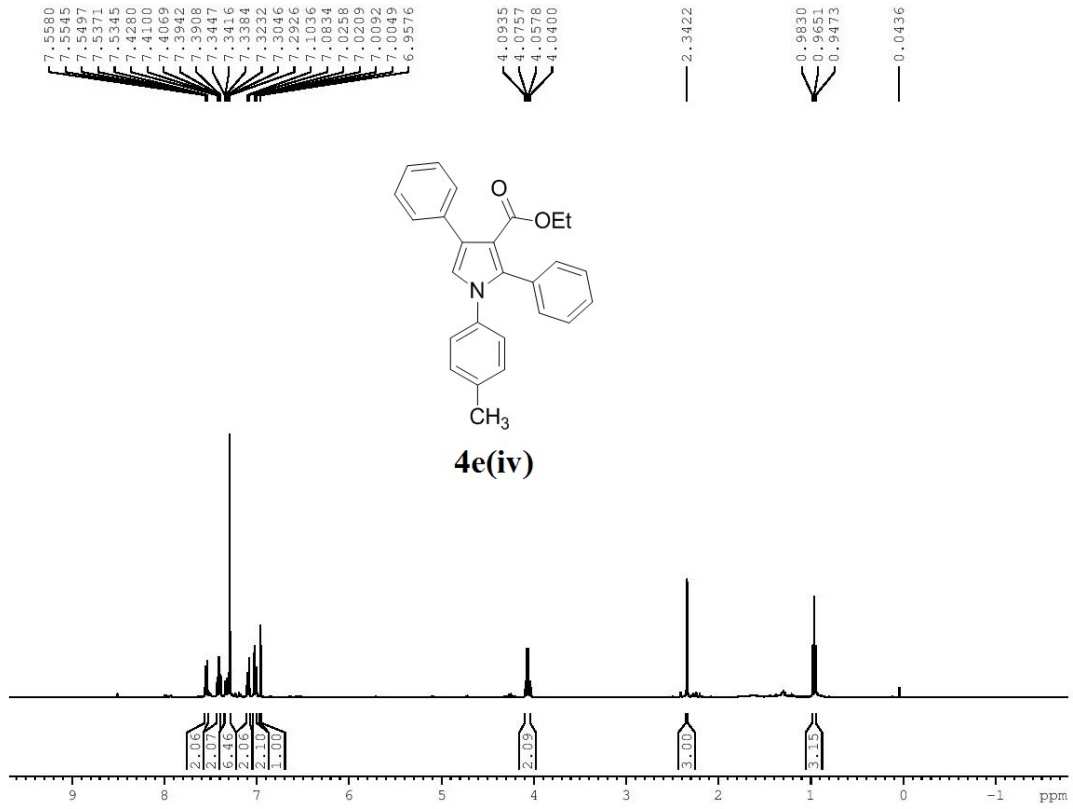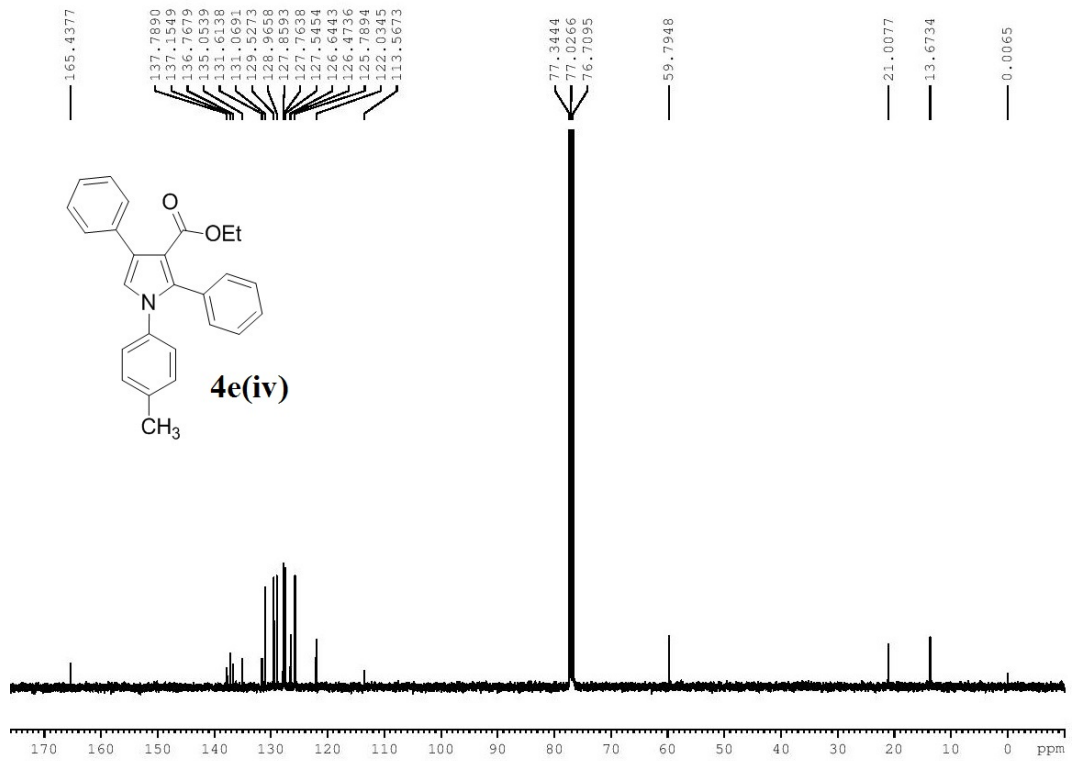

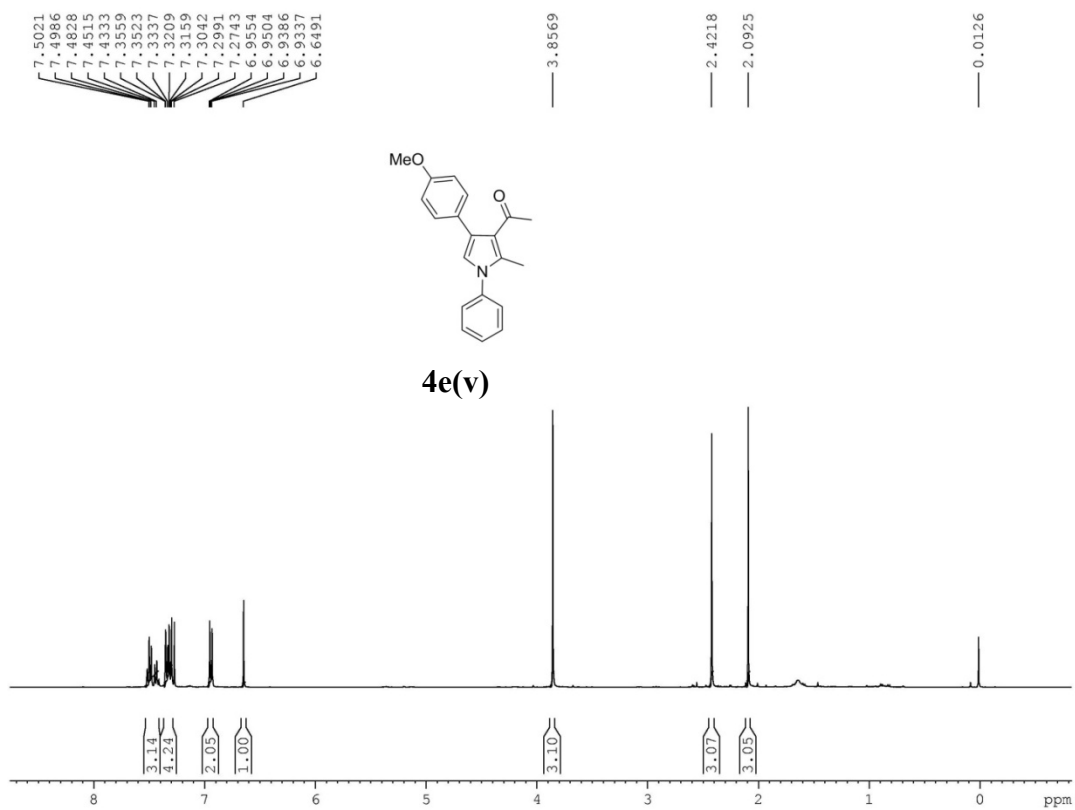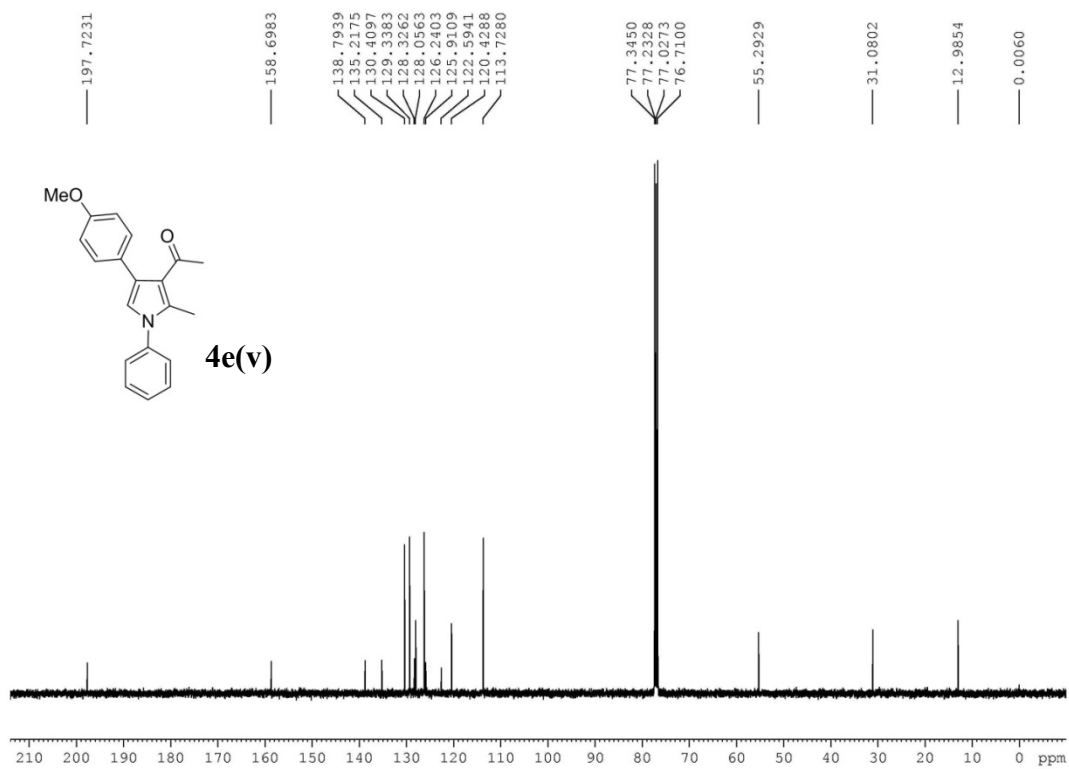

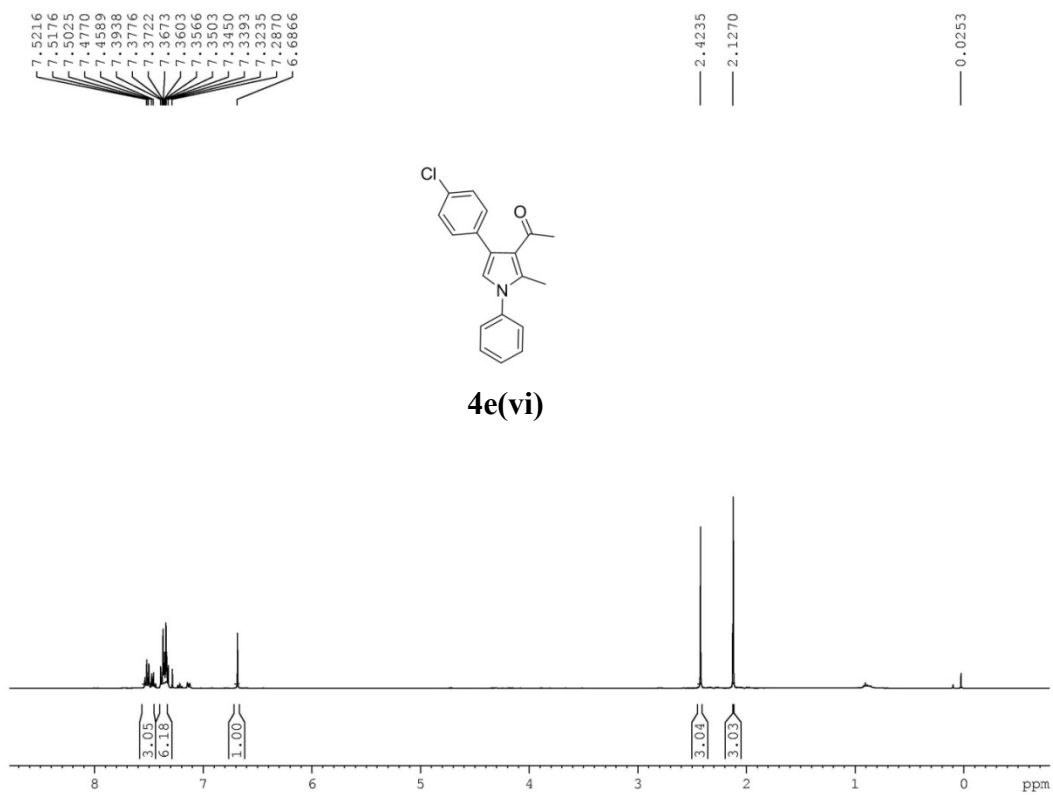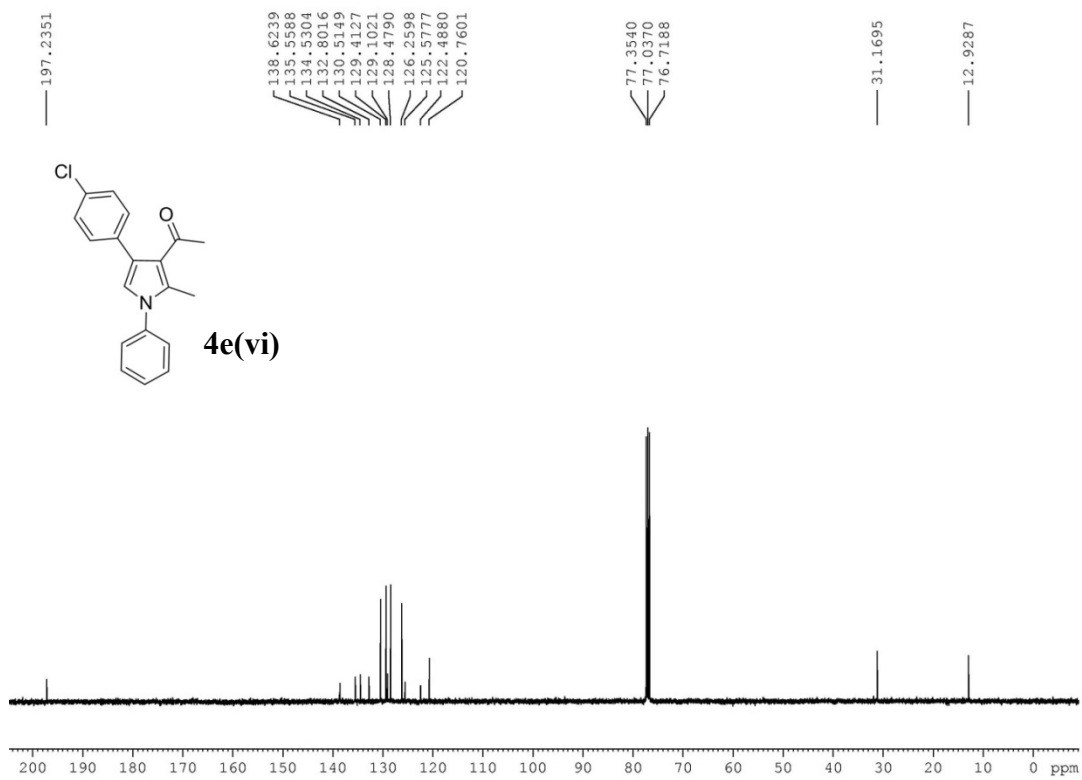

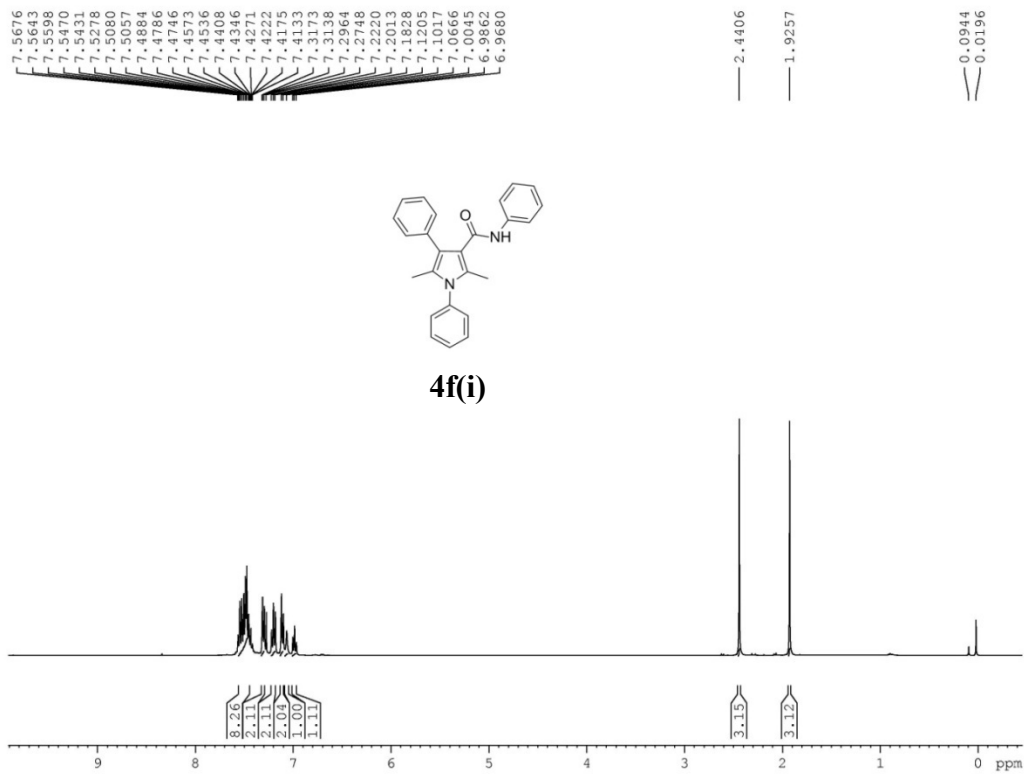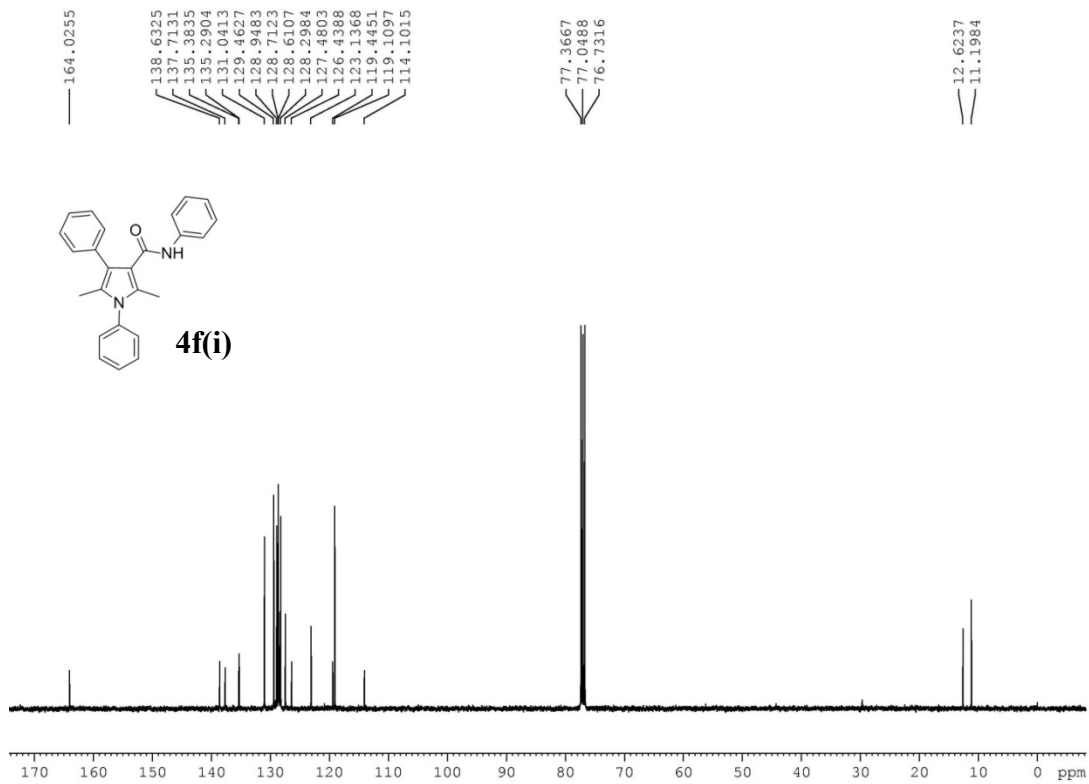

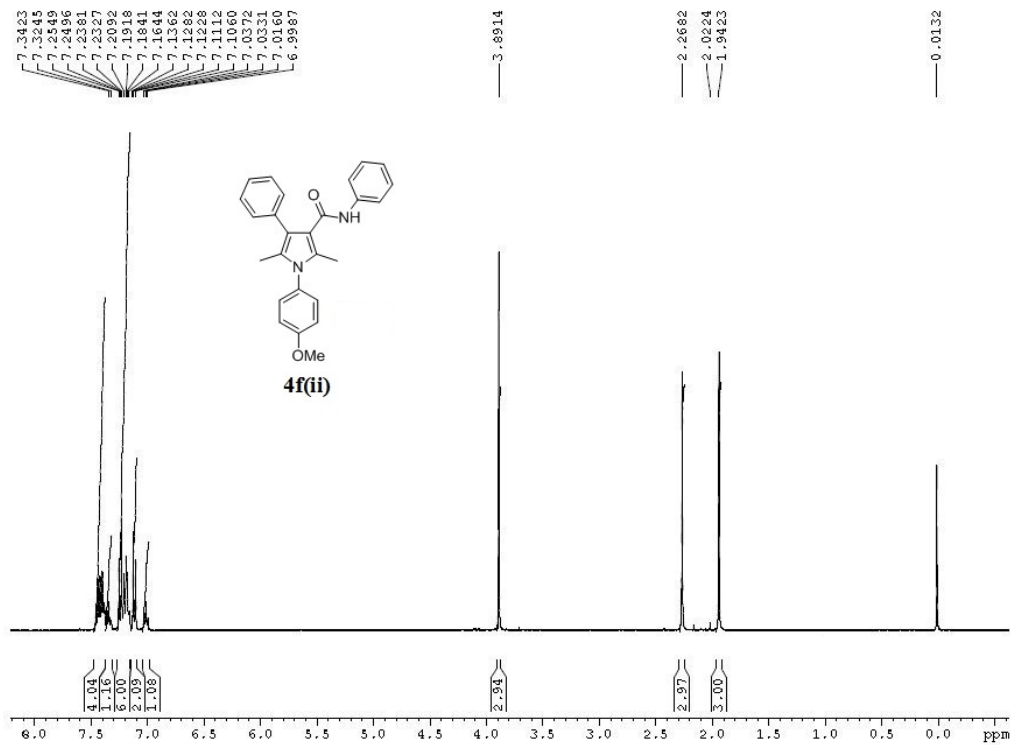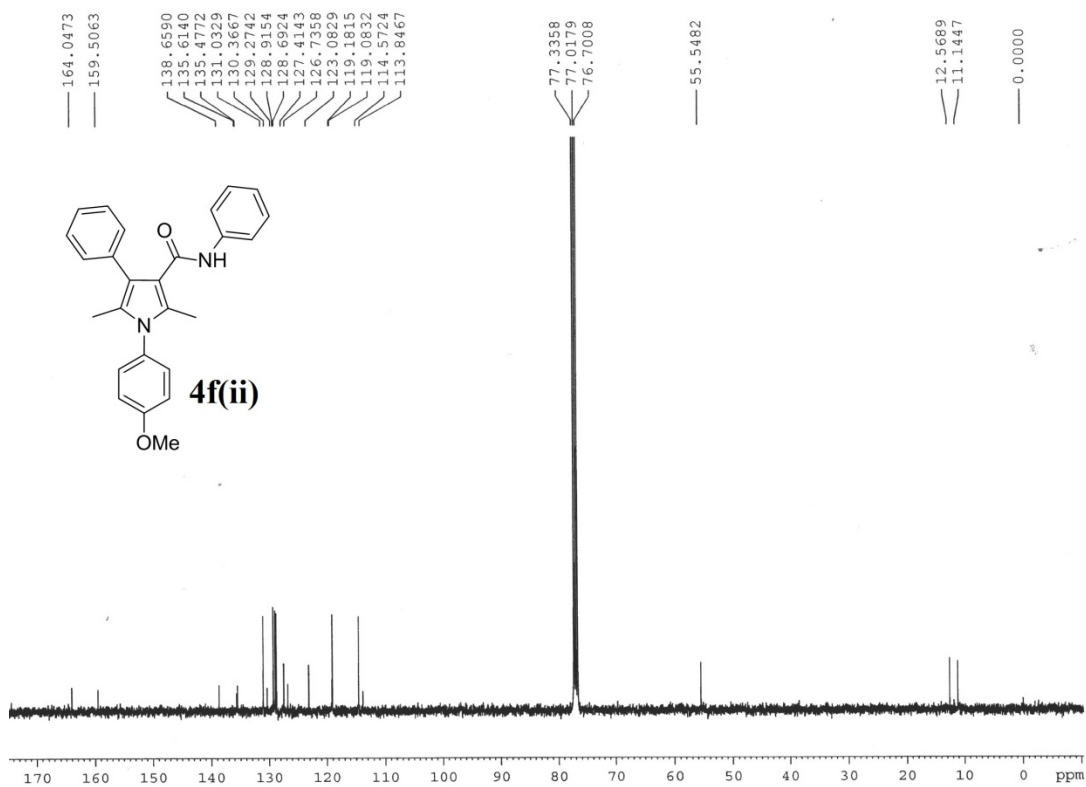

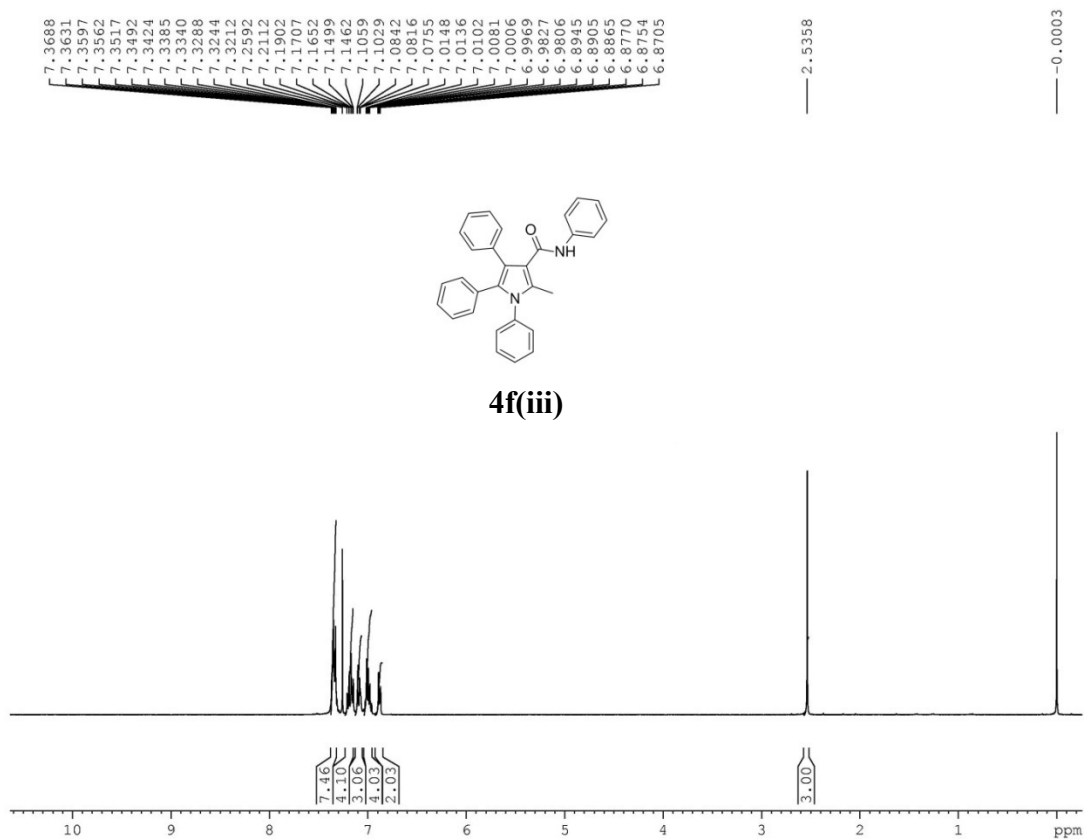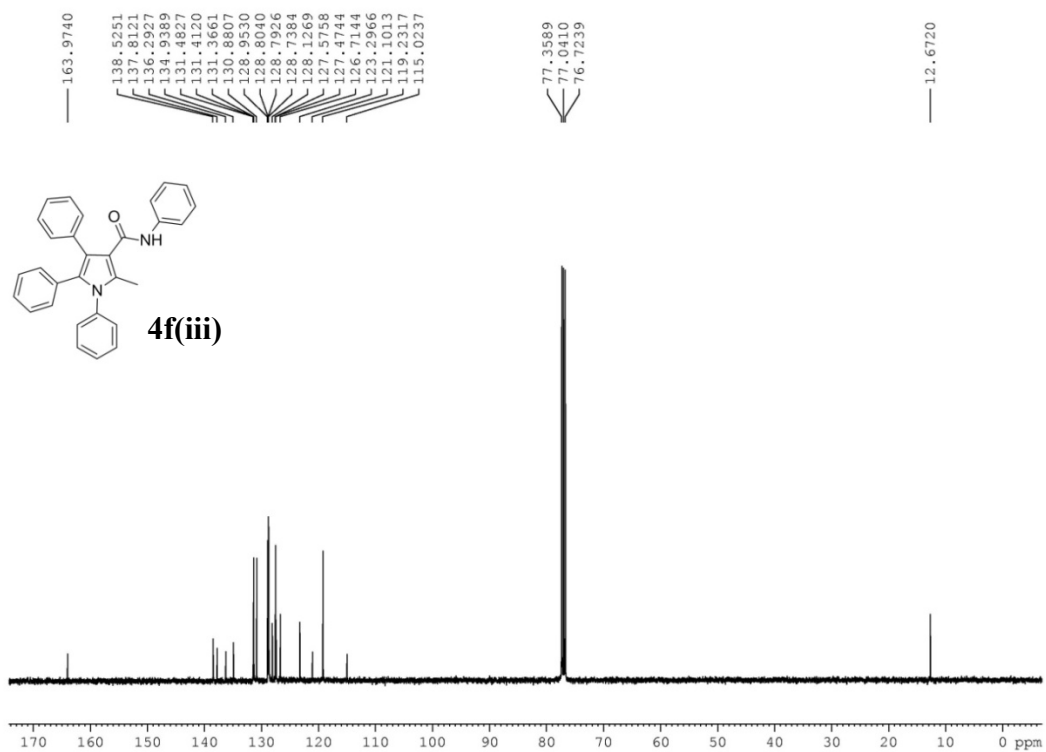



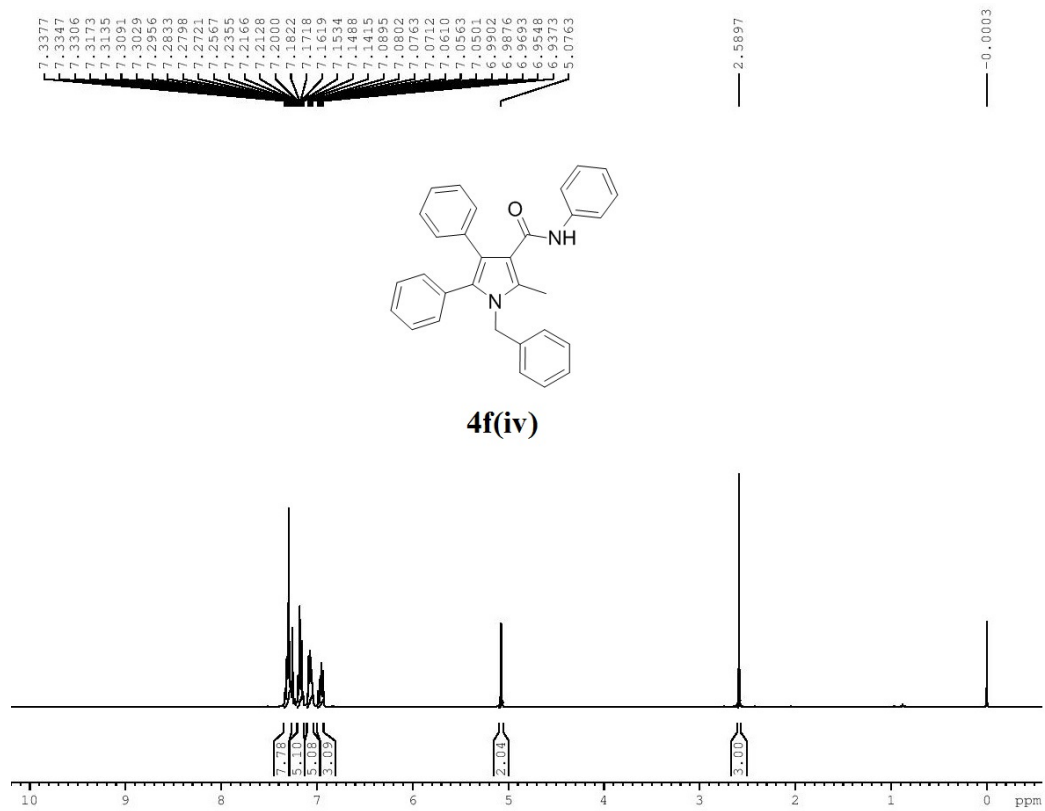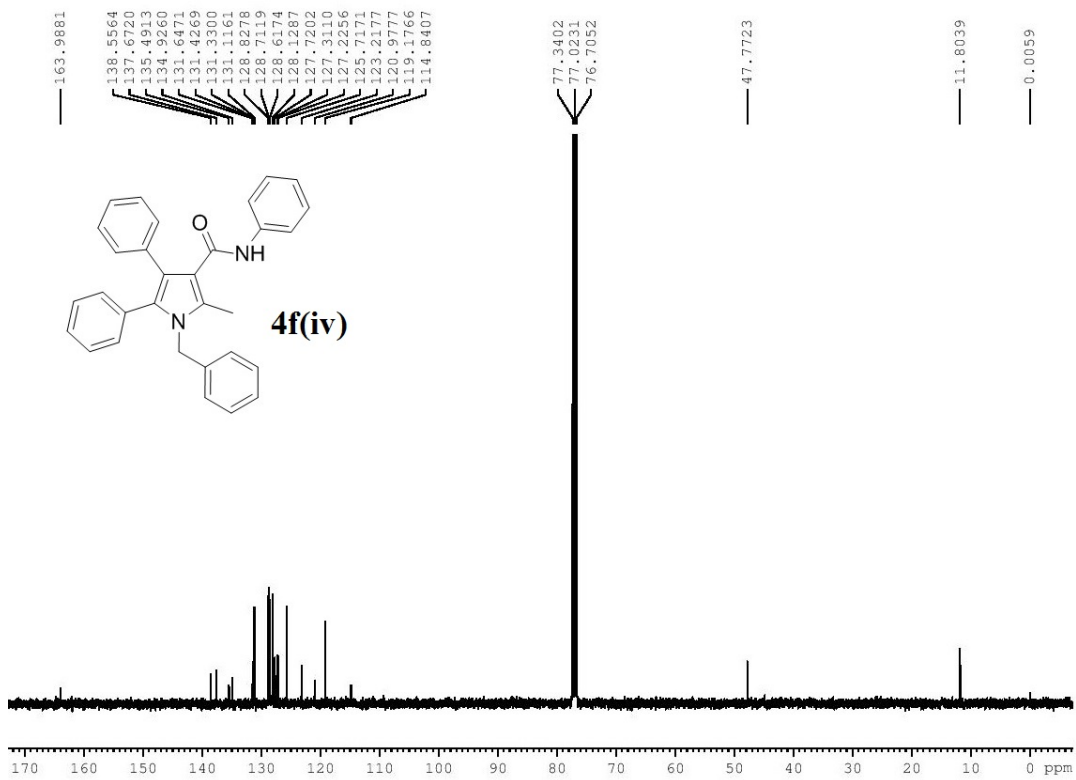

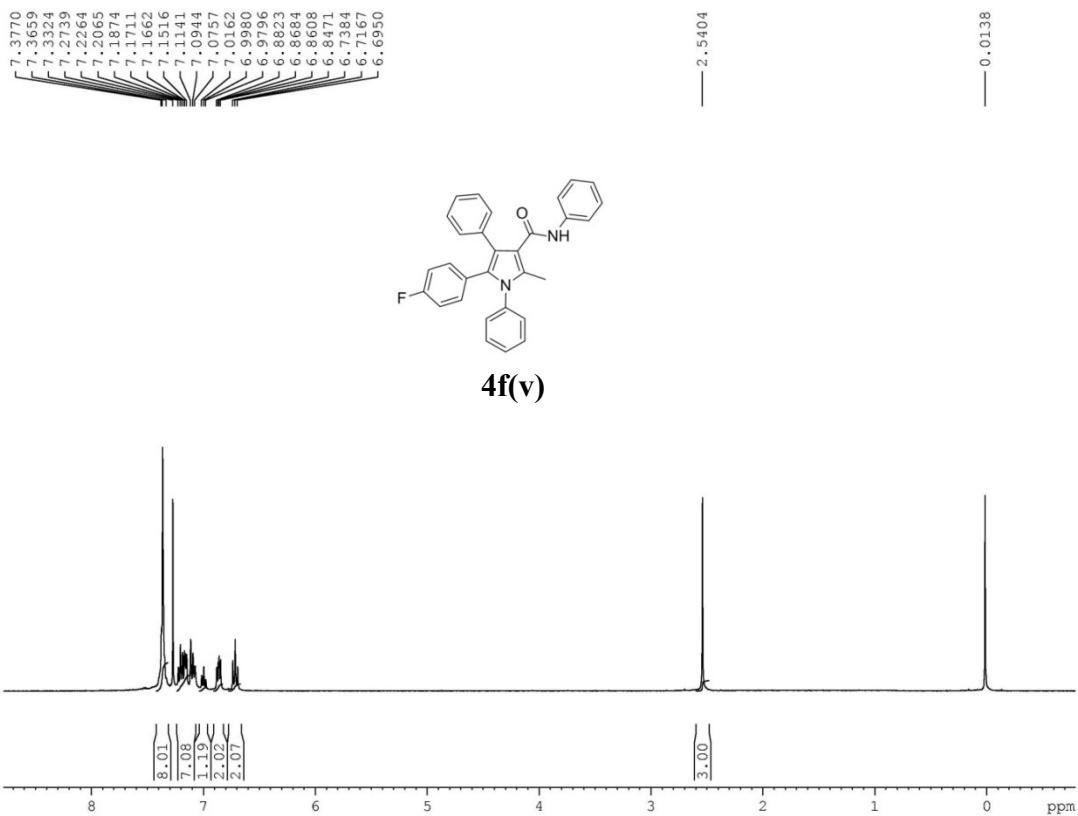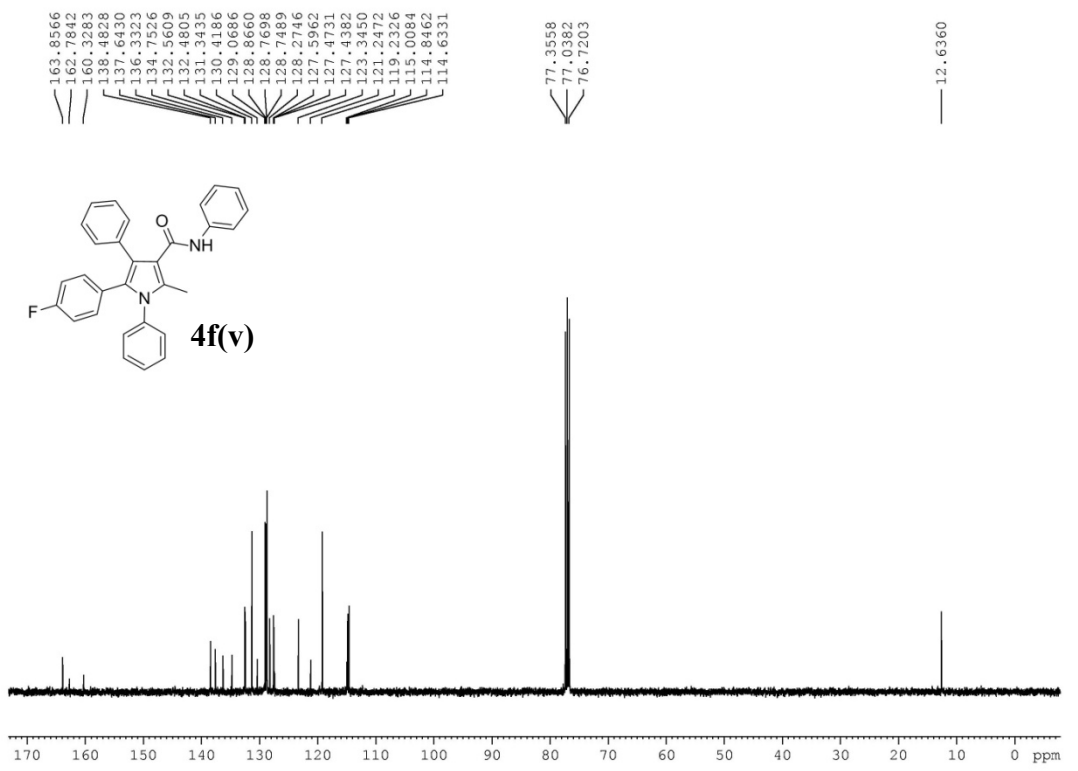

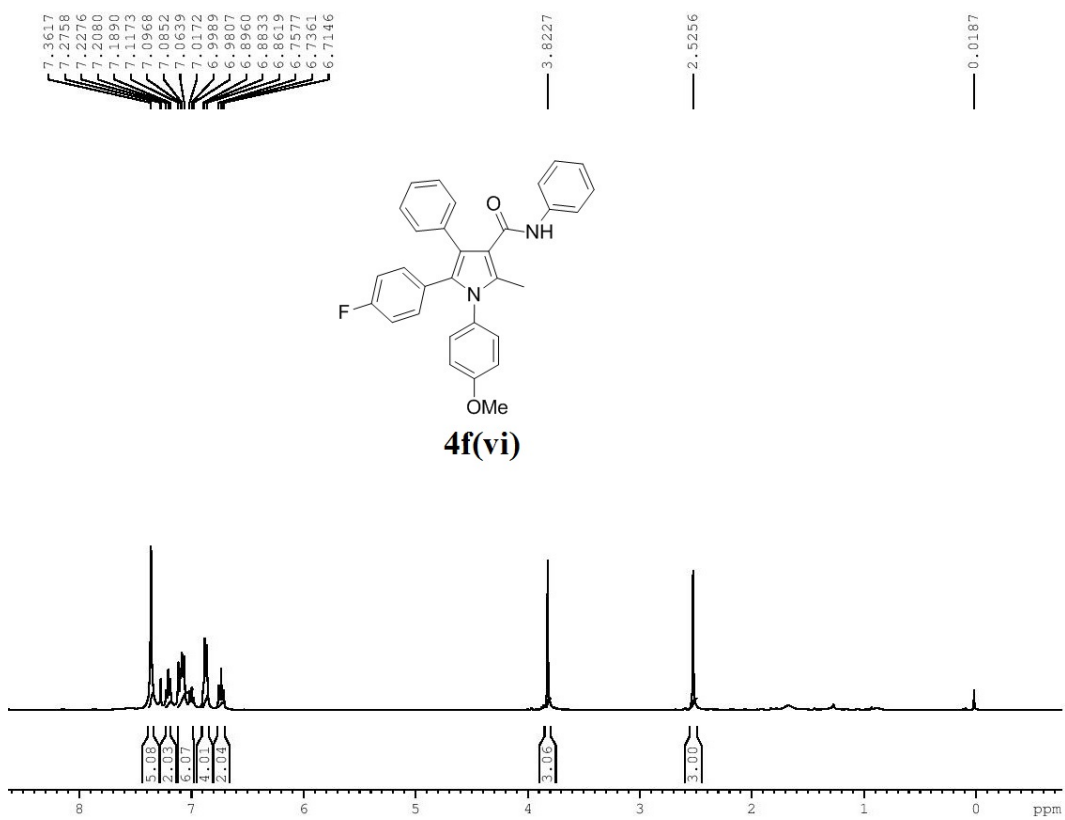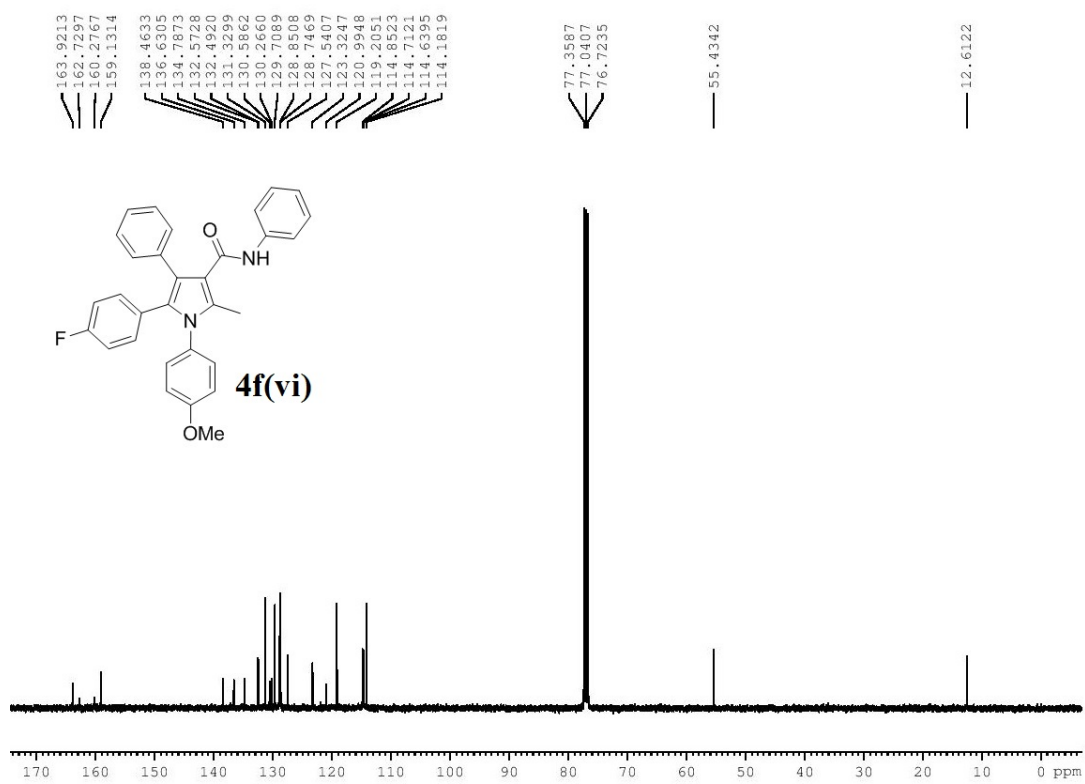

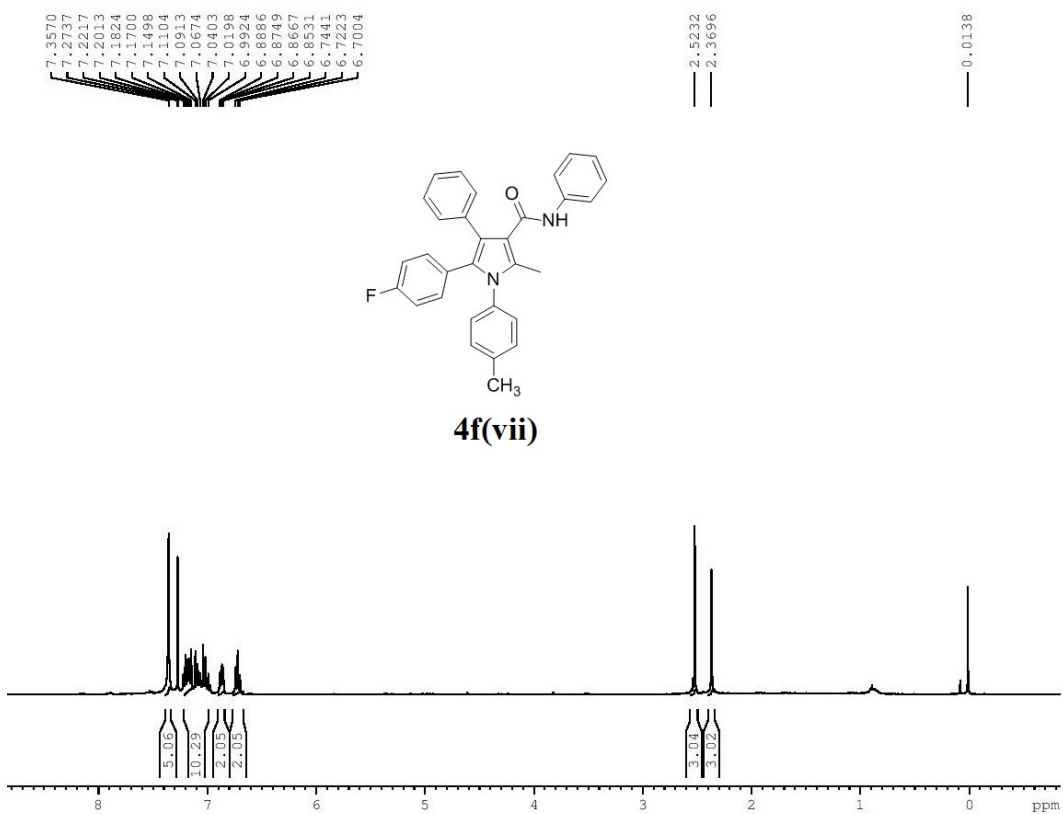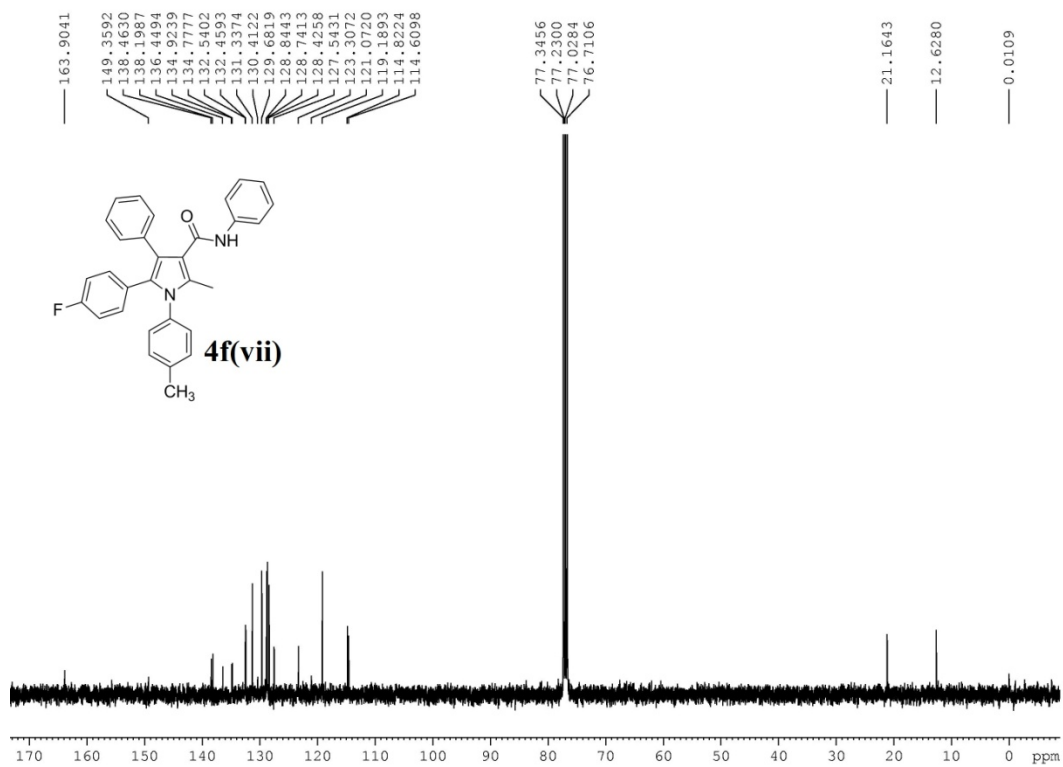

Supplement: c4ra09873k3.pdf [file c4ra09873k3.pdf]
