# Supplementary material for: Zirconocene dichloride catalysed one-pot synthesis of pyrroles through nitroalkene-enamine assembly
Source: Royal Society of Chemistry journal article supplement (doi:10.1039/c4ra09873k), 2014-12-10
Supplement: c4ra09873k1.pdf [file c4ra09873k1.pdf]

**Zirconocene dichloride Catalysed One Pot  
Synthesis of Pyrroles through Nitroalkene-Enamine Assembly**

**Sandeep Goyal, Jatinkumar K. Patel, Mukesh Gangar, Kapil Kumar and Vipin A. Nair\***

**Supporting Information**

| <b>Contents</b>               | <b>Pages</b> |
|-------------------------------|--------------|
| <b>Copies of HRMS Spectra</b> | <b>2-44</b>  |

# Mass Spectrum List Report

## Analysis Info

Analysis Name D:\Data\vipin\13-08-27-MCR-40.d  
 Method sodium formate tune\_low.m  
 Sample Name MCR-40  
 Comment

Acquisition Date 8/29/2013 12:07:41 PM

Operator VIKAS GROVER  
 Instrument / Ser# maXis 40

## Acquisition Parameter

|             |            |                       |           |                  |           |
|-------------|------------|-----------------------|-----------|------------------|-----------|
| Source Type | ESI        | Ion Polarity          | Positive  | Set Nebulizer    | 1.2 Bar   |
| Focus       | Not active | Set Capillary         | 4500 V    | Set Dry Heater   | 180 °C    |
| Scan Begin  | 50 m/z     | Set End Plate Offset  | -500 V    | Set Dry Gas      | 7.0 l/min |
| Scan End    | 500 m/z    | Set Collision Cell RF | 300.0 Vpp | Set Divert Valve | Source    |

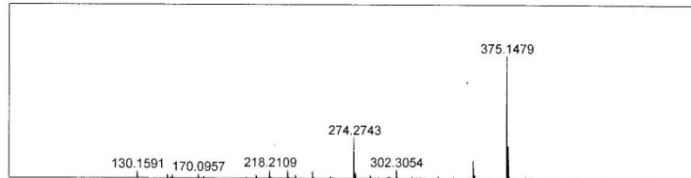

+MS, 0.1min #7

| #  | m/z      | Res.  | S/N    | I      | FWHM   |
|----|----------|-------|--------|--------|--------|
| 1  | 130.1591 | 17050 | 423.2  | 47524  | 0.0076 |
| 2  | 153.1380 | 16517 | 146.8  | 26840  | 0.0093 |
| 3  | 170.0957 | 16598 | 154.8  | 27640  | 0.0102 |
| 4  | 202.2157 | 18399 | 40.1   | 9704   | 0.0110 |
| 5  | 209.1066 | 17411 | 84.9   | 22553  | 0.0120 |
| 6  | 218.2109 | 16964 | 204.5  | 61175  | 0.0129 |
| 7  | 230.2473 | 17223 | 168.8  | 58506  | 0.0134 |
| 8  | 246.2424 | 18117 | 125.9  | 54311  | 0.0136 |
| 9  | 274.2743 | 16800 | 351.6  | 298263 | 0.0163 |
| 10 | 285.1384 | 18831 | 31.8   | 22717  | 0.0151 |
| 11 | 302.3054 | 18533 | 130.7  | 62190  | 0.0163 |
| 12 | 353.1654 | 17877 | 272.1  | 134405 | 0.0198 |
| 13 | 375.1479 | 16394 | 1532.6 | 891742 | 0.0229 |
| 14 | 376.1509 | 17323 | 427.7  | 241529 | 0.0217 |
| 15 | 377.1532 | 17735 | 43.4   | 23747  | 0.0213 |

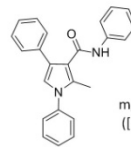

4a(i)

m/z: Calc'd for C<sub>24</sub>H<sub>20</sub>N<sub>3</sub>NaO  
 ([M+Na]<sup>+</sup>): 375.1473, found: 375.1479

## Mass Spectrum List Report

**Analysis Info**

Analysis Name D:\Data\vipin\13-01-21-MCR-5.d  
 Method sodium formate tune\_low.m  
 Sample Name MCR-5  
 Comment

Acquisition Date 1/21/2013 10:17:37 AM

Operator VIKAS GROVER  
 Instrument / Ser# maXis 40

**Acquisition Parameter**

|             |            |                       |           |                  |           |
|-------------|------------|-----------------------|-----------|------------------|-----------|
| Source Type | ESI        | Ion Polarity          | Positive  | Set Nebulizer    | 1.2 Bar   |
| Focus       | Not active | Set Capillary         | 4500 V    | Set Dry Heater   | 180 °C    |
| Scan Begin  | 50 m/z     | Set End Plate Offset  | -500 V    | Set Dry Gas      | 7.0 l/min |
| Scan End    | 500 m/z    | Set Collision Cell RF | 300.0 Vpp | Set Divert Valve | Source    |

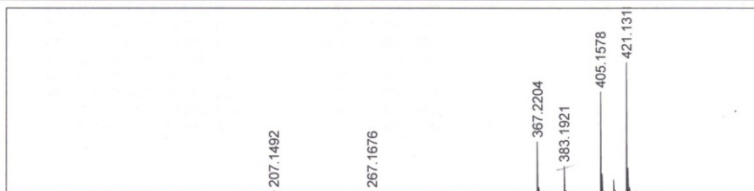

— +MS, 0.6min #34

| #  | m/z      | Res.  | S/N   | I     | FWHM   |
|----|----------|-------|-------|-------|--------|
| 1  | 116.1180 | 23474 | 11.7  | 347   | 0.0049 |
| 2  | 124.0755 | 17906 | 18.0  | 583   | 0.0069 |
| 3  | 130.1592 | 21898 | 13.8  | 404   | 0.0059 |
| 4  | 177.1380 | 19480 | 10.2  | 148   | 0.0091 |
| 5  | 207.1492 | 21316 | 50.5  | 964   | 0.0097 |
| 6  | 256.0790 | 25702 | 12.4  | 217   | 0.0100 |
| 7  | 263.2116 | 25677 | 19.9  | 371   | 0.0103 |
| 8  | 267.1676 | 21863 | 46.4  | 891   | 0.0122 |
| 9  | 311.1579 | 20531 | 16.3  | 264   | 0.0152 |
| 10 | 316.9829 | 22213 | 10.7  | 167   | 0.0143 |
| 11 | 332.9560 | 28057 | 12.5  | 179   | 0.0119 |
| 12 | 355.2816 | 30744 | 12.0  | 295   | 0.0116 |
| 13 | 367.2204 | 23312 | 676.7 | 21189 | 0.0158 |
| 14 | 368.2232 | 24722 | 88.6  | 2928  | 0.0149 |
| 15 | 369.2250 | 23755 | 10.2  | 356   | 0.0155 |
| 16 | 383.1921 | 22917 | 192.1 | 11314 | 0.0167 |
| 17 | 384.1937 | 21671 | 26.4  | 1599  | 0.0177 |
| 18 | 385.1930 | 17861 | 10.7  | 669   | 0.0216 |
| 19 | 405.1578 | 23088 | 383.4 | 41329 | 0.0175 |
| 20 | 406.1605 | 24181 | 73.1  | 8109  | 0.0168 |
| 21 | 413.2662 | 23698 | 45.1  | 6029  | 0.0174 |
| 22 | 414.2690 | 26842 | 10.2  | 1395  | 0.0154 |
| 23 | 421.1318 | 22967 | 334.5 | 53134 | 0.0183 |
| 24 | 422.1345 | 24520 | 65.0  | 10525 | 0.0172 |
| 25 | 423.1327 | 19596 | 17.3  | 2852  | 0.0216 |
| 26 | 503.1554 | 25133 | 11.3  | 186   | 0.0200 |

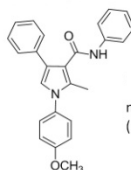

**4a(ii)**

m/z: Calc'd for C<sub>25</sub>H<sub>22</sub>N<sub>2</sub>NaO<sub>2</sub>  
 ([M+Na]<sup>+</sup>): 405.1579, found: 405.1578

## Mass Spectrum List Report

|                      |                                |                   |                      |
|----------------------|--------------------------------|-------------------|----------------------|
| <b>Analysis Info</b> |                                | Acquisition Date  | 1/21/2013 9:28:01 AM |
| Analysis Name        | D:\Data\vipin\13-01-21-MCR-3.d | Operator          | VIKAS GROVER         |
| Method               | sodium formate tune_low.m      | Instrument / Ser# | maXis 40             |
| Sample Name          | MCR-3                          |                   |                      |
| Comment              |                                |                   |                      |

|                              |            |                       |           |                  |           |
|------------------------------|------------|-----------------------|-----------|------------------|-----------|
| <b>Acquisition Parameter</b> |            |                       |           |                  |           |
| Source Type                  | ESI        | Ion Polarity          | Positive  | Set Nebulizer    | 1.2 Bar   |
| Focus                        | Not active | Set Capillary         | 4500 V    | Set Dry Heater   | 180 °C    |
| Scan Begin                   | 50 m/z     | Set End Plate Offset  | -500 V    | Set Dry Gas      | 7.0 l/min |
| Scan End                     | 500 m/z    | Set Collision Cell RF | 300.0 Vpp | Set Divert Valve | Source    |

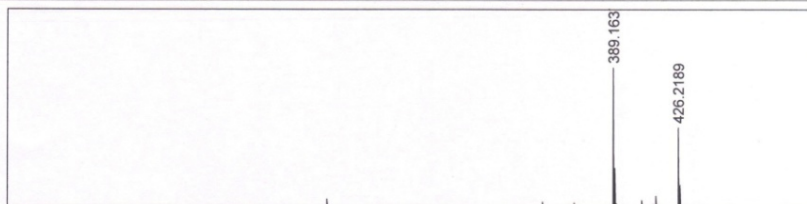

— +MS, 1.4min #85

| #   | m/z      | Res.  | S/N     | I      | FWHM   |
|-----|----------|-------|---------|--------|--------|
| ↔ 1 | 389.1637 | 18999 | 13875.6 | 296096 | 0.0205 |
| 2   | 390.1666 | 20741 | 3802.5  | 83179  | 0.0188 |
| 3   | 391.1690 | 23119 | 338.2   | 7580   | 0.0169 |
| 4   | 426.2189 | 19725 | 5548.8  | 168992 | 0.0216 |
| 5   | 427.2217 | 22656 | 1573.1  | 48162  | 0.0189 |
| 6   | 428.2237 | 22737 | 158.1   | 4865   | 0.0188 |

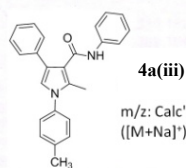

m/z: Calc'd for  $C_{25}H_{22}N_2NaO$   
 ([M+Na]<sup>+</sup>): 389.1630, found: 389.1637



## Mass Spectrum List Report

**Analysis Info**

Analysis Name: D:\Data\vipin\13-01-18-MCR-1.d  
 Method: sodium formate tune\_low.m  
 Sample Name: MCR-1  
 Comment:

Acquisition Date: 1/18/2013 4:25:19 PM

Operator: VIKAS GROVER  
 Instrument / Ser#: maXis 40

**Acquisition Parameter**

|             |            |                       |           |                  |           |
|-------------|------------|-----------------------|-----------|------------------|-----------|
| Source Type | ESI        | Ion Polarity          | Positive  | Set Nebulizer    | 1.2 Bar   |
| Focus       | Not active | Set Capillary         | 4500 V    | Set Dry Heater   | 180 °C    |
| Scan Begin  | 50 m/z     | Set End Plate Offset  | -500 V    | Set Dry Gas      | 7.0 l/min |
| Scan End    | 500 m/z    | Set Collision Cell RF | 300.0 Vpp | Set Divert Valve | Source    |

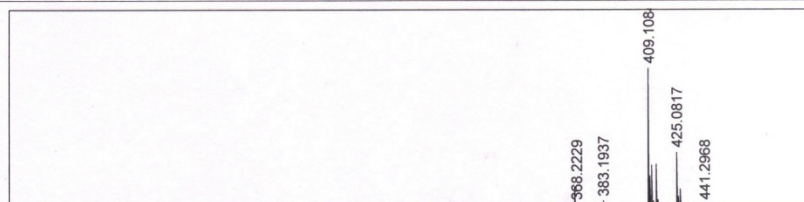

— +MS, 0.8min #47

| #    | m/z      | Res.  | S/N   | I      | FWHM   |
|------|----------|-------|-------|--------|--------|
| 1    | 256.9614 | 23184 | 56.2  | 1209   | 0.0111 |
| 2    | 267.1677 | 22388 | 38.6  | 805    | 0.0119 |
| 3    | 272.9357 | 27114 | 19.2  | 393    | 0.0101 |
| 4    | 286.9717 | 21992 | 14.2  | 298    | 0.0130 |
| 5    | 294.9380 | 24956 | 19.8  | 425    | 0.0118 |
| 6    | 301.1039 | 21083 | 50.5  | 1098   | 0.0143 |
| 7    | 311.1929 | 25247 | 11.0  | 236    | 0.0123 |
| 8    | 324.9482 | 22423 | 18.3  | 362    | 0.0145 |
| 9    | 333.1270 | 24425 | 14.0  | 264    | 0.0136 |
| 10   | 362.9255 | 24348 | 11.8  | 550    | 0.0149 |
| 11   | 368.2229 | 24883 | 57.8  | 3253   | 0.0148 |
| 12   | 383.1937 | 24264 | 57.1  | 6949   | 0.0158 |
| → 13 | 409.1084 | 20575 | 851.9 | 156648 | 0.0199 |
| 14   | 410.1109 | 23395 | 191.2 | 35131  | 0.0175 |
| 15   | 411.1057 | 21774 | 260.0 | 47766  | 0.0189 |
| 16   | 412.1078 | 22444 | 40.1  | 7371   | 0.0184 |
| 17   | 413.2662 | 22863 | 266.3 | 48856  | 0.0181 |
| 18   | 414.2689 | 23673 | 45.9  | 8412   | 0.0175 |
| 19   | 425.0817 | 22189 | 339.9 | 61963  | 0.0192 |
| 20   | 426.0845 | 25777 | 66.1  | 12044  | 0.0165 |
| 21   | 427.0793 | 23699 | 113.3 | 20627  | 0.0180 |
| 22   | 428.0818 | 22914 | 19.2  | 3486   | 0.0187 |
| 23   | 441.2968 | 26884 | 25.2  | 2991   | 0.0164 |
| 24   | 460.9235 | 26649 | 13.0  | 412    | 0.0173 |
| 25   | 466.2881 | 30913 | 10.1  | 317    | 0.0151 |
| 26   | 477.0948 | 24422 | 41.6  | 1281   | 0.0195 |
| 27   | 479.0923 | 25642 | 14.8  | 453    | 0.0187 |

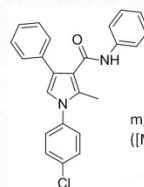

**4a(iv)**

m/z: Calc'd for C<sub>22</sub>H<sub>19</sub>ClN<sub>2</sub>NaO  
 ([M+Na]<sup>+</sup>): 409.1084, found: 409.1084.

## Mass Spectrum List Report

|                      |                                |                   |                      |
|----------------------|--------------------------------|-------------------|----------------------|
| <b>Analysis Info</b> |                                | Acquisition Date  | 1/18/2013 4:55:17 PM |
| Analysis Name        | D:\Data\vipin\13-01-18-MCR-2.d | Operator          | VIKAS GROVER         |
| Method               | sodium formate tune_low.m      | Instrument / Ser# | maXis 40             |
| Sample Name          | MCR-2                          |                   |                      |
| Comment              |                                |                   |                      |

|                              |            |                       |           |                  |           |
|------------------------------|------------|-----------------------|-----------|------------------|-----------|
| <b>Acquisition Parameter</b> |            |                       |           |                  |           |
| Source Type                  | ESI        | Ion Polarity          | Positive  | Set Nebulizer    | 1.2 Bar   |
| Focus                        | Not active | Set Capillary         | 4500 V    | Set Dry Heater   | 180 °C    |
| Scan Begin                   | 50 m/z     | Set End Plate Offset  | -500 V    | Set Dry Gas      | 7.0 l/min |
| Scan End                     | 500 m/z    | Set Collision Cell RF | 300.0 Vpp | Set Divert Valve | Source    |

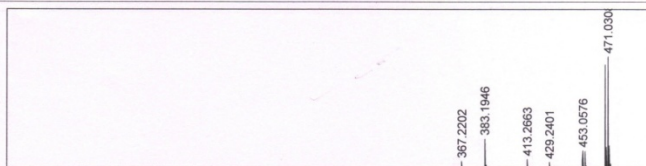

+MS, 0.5min #30

| #  | m/z      | Res.  | S/N    | I      | FWHM   |
|----|----------|-------|--------|--------|--------|
| 1  | 301.1042 | 24302 | 22.4   | 460    | 0.0124 |
| 2  | 317.0761 | 22641 | 11.1   | 231    | 0.0140 |
| 3  | 349.1147 | 21031 | 16.7   | 485    | 0.0166 |
| 4  | 365.0905 | 21109 | 13.2   | 514    | 0.0173 |
| 5  | 367.2202 | 22542 | 214.4  | 8592   | 0.0163 |
| 6  | 368.2233 | 22158 | 32.8   | 1325   | 0.0166 |
| 7  | 383.1946 | 23602 | 801.8  | 36303  | 0.0162 |
| 8  | 384.1975 | 25122 | 102.1  | 4658   | 0.0153 |
| 9  | 385.1941 | 21033 | 36.9   | 1695   | 0.0183 |
| 10 | 413.2663 | 23644 | 149.8  | 11373  | 0.0175 |
| 11 | 414.2692 | 23432 | 27.9   | 2162   | 0.0177 |
| 12 | 425.0814 | 23391 | 14.8   | 1412   | 0.0182 |
| 13 | 429.2401 | 25220 | 75.6   | 7770   | 0.0170 |
| 14 | 430.2435 | 24586 | 15.6   | 1638   | 0.0175 |
| 15 | 431.0752 | 26608 | 12.6   | 1341   | 0.0162 |
| 16 | 433.0733 | 22594 | 11.3   | 1249   | 0.0192 |
| 17 | 453.0576 | 25116 | 145.5  | 21840  | 0.0180 |
| 18 | 454.0603 | 23574 | 23.6   | 3594   | 0.0193 |
| 19 | 455.0559 | 23805 | 137.5  | 21183  | 0.0191 |
| 20 | 456.0587 | 25172 | 23.6   | 3680   | 0.0181 |
| 21 | 469.0325 | 21162 | 1069.9 | 126989 | 0.0222 |
| 22 | 470.0349 | 24958 | 232.5  | 26589  | 0.0188 |
| 23 | 471.0308 | 20810 | 1240.2 | 136480 | 0.0226 |
| 24 | 472.0331 | 24477 | 267.8  | 28312  | 0.0193 |
| 25 | 473.0304 | 22166 | 67.2   | 6812   | 0.0213 |
| 26 | 474.0318 | 22336 | 11.7   | 1134   | 0.0212 |
| 27 | 490.1124 | 23335 | 23.9   | 701    | 0.0210 |
| 28 | 492.1110 | 25777 | 27.9   | 817    | 0.0191 |
| 29 | 493.0122 | 24236 | 11.3   | 332    | 0.0203 |

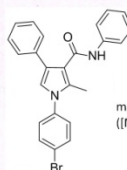

**4a(v)**

m/z: Calc'd for  $C_{24}H_{19}BrN_3NaO$   
 ([[M+Na]<sup>+</sup>]: 453.0578, found: 453.0576.

## Mass Spectrum List Report

**Analysis Info**

Analysis Name D:\Data\vipin\14-01-20-SRM-51.d  
 Method sodium formate tune\_low.m  
 Sample Name SRM-51  
 Comment

Acquisition Date 1/20/2014 3:19:41 PM

Operator VIKAS GROVER  
 Instrument / Ser# maXis 40

**Acquisition Parameter**

|             |            |                       |           |                  |           |
|-------------|------------|-----------------------|-----------|------------------|-----------|
| Source Type | ESI        | Ion Polarity          | Positive  | Set Nebulizer    | 1.2 Bar   |
| Focus       | Not active | Set Capillary         | 4500 V    | Set Dry Heater   | 180 °C    |
| Scan Begin  | 50 m/z     | Set End Plate Offset  | -500 V    | Set Dry Gas      | 7.0 l/min |
| Scan End    | 500 m/z    | Set Collision Cell RF | 300.0 Vpp | Set Divert Valve | Source    |

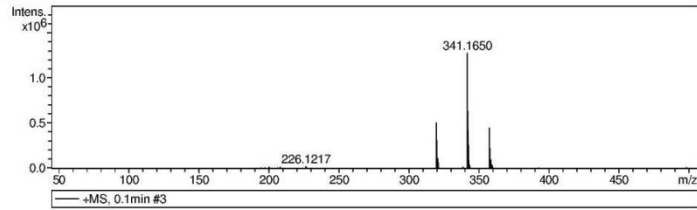

| #  | m/z      | Res.  | S/N     | I       | FWHM   |
|----|----------|-------|---------|---------|--------|
| 1  | 131.1075 | 15697 | 83.5    | 3595    | 0.0084 |
| 2  | 194.1148 | 17424 | 87.7    | 11188   | 0.0111 |
| 3  | 197.0757 | 16200 | 52.0    | 6910    | 0.0122 |
| 4  | 198.0916 | 18872 | 19.9    | 2678    | 0.0105 |
| 5  | 200.1411 | 17475 | 110.6   | 15279   | 0.0115 |
| 6  | 206.0816 | 18215 | 44.7    | 6637    | 0.0113 |
| 7  | 208.1313 | 17751 | 104.8   | 15949   | 0.0117 |
| 8  | 226.1217 | 17469 | 253.6   | 29502   | 0.0129 |
| 9  | 227.1251 | 17124 | 24.5    | 2763    | 0.0133 |
| 10 | 274.1410 | 16640 | 61.0    | 3182    | 0.0165 |
| 11 | 319.1819 | 15150 | 3823.3  | 505696  | 0.0211 |
| 12 | 320.1846 | 15463 | 867.4   | 111977  | 0.0207 |
| 13 | 321.1867 | 17139 | 58.4    | 7356    | 0.0187 |
| 14 | 330.1658 | 17346 | 41.8    | 4078    | 0.0190 |
| 15 | 338.1546 | 18325 | 200.6   | 18339   | 0.0185 |
| 16 | 338.6561 | 18049 | 74.0    | 7059    | 0.0188 |
| 17 | 341.1650 | 11514 | 11110.4 | 1273847 | 0.0296 |
| 18 | 341.3031 | 6607  | 39.1    | 4539    | 0.0517 |
| 19 | 342.1670 | 14563 | 3452.8  | 422649  | 0.0235 |
| 20 | 343.1692 | 17787 | 347.3   | 45214   | 0.0193 |
| 21 | 357.1378 | 15242 | 1893.7  | 451111  | 0.0234 |
| 22 | 358.1404 | 15976 | 403.1   | 99153   | 0.0224 |
| 23 | 359.1373 | 16218 | 126.8   | 32173   | 0.0221 |
| 24 | 360.1379 | 16891 | 13.4    | 3517    | 0.0213 |
| 25 | 392.2330 | 19552 | 53.7    | 6558    | 0.0201 |
| 26 | 489.2536 | 18530 | 46.9    | 4555    | 0.0264 |
| 27 | 489.7547 | 17717 | 38.1    | 3734    | 0.0276 |
| 28 | 497.2428 | 18415 | 122.3   | 11985   | 0.0270 |
| 29 | 497.7439 | 18273 | 82.7    | 8101    | 0.0272 |
| 30 | 498.2497 | 14812 | 29.8    | 2920    | 0.0336 |

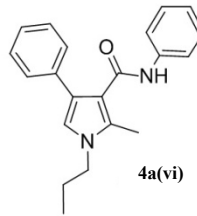

m/z: Calc'd for C<sub>21</sub>H<sub>22</sub>N<sub>2</sub>NaO  
 ([M+Na]<sup>+</sup>): 341.1630, found: 341.1650.

## Mass Spectrum List Report

**Analysis Info**

Analysis Name D:\Data\vipin\14-01-20-SRM-53-A.d  
 Method sodium formate tune\_low.m  
 Sample Name SRM-53-A  
 Comment

Acquisition Date 1/20/2014 3:32:01 PM

Operator VIKAS GROVER  
 Instrument / Ser# maXis 40

**Acquisition Parameter**

|             |            |                       |           |                  |           |
|-------------|------------|-----------------------|-----------|------------------|-----------|
| Source Type | ESI        | Ion Polarity          | Positive  | Set Nebulizer    | 1.2 Bar   |
| Focus       | Not active | Set Capillary         | 4500 V    | Set Dry Heater   | 180 °C    |
| Scan Begin  | 50 m/z     | Set End Plate Offset  | -500 V    | Set Dry Gas      | 7.0 l/min |
| Scan End    | 500 m/z    | Set Collision Cell RF | 300.0 Vpp | Set Divert Valve | Source    |

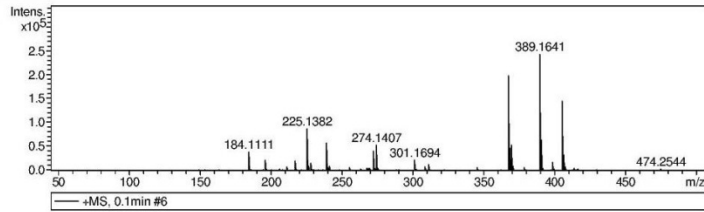

| #  | m/z      | Res.  | S/N   | I      | FWHM   |
|----|----------|-------|-------|--------|--------|
| 1  | 184.1111 | 16828 | 283.3 | 38527  | 0.0109 |
| 2  | 196.1112 | 17644 | 152.3 | 22381  | 0.0111 |
| 3  | 211.1221 | 16673 | 47.3  | 7605   | 0.0127 |
| 4  | 217.1690 | 16858 | 131.6 | 21324  | 0.0129 |
| 5  | 225.1382 | 15775 | 545.6 | 87106  | 0.0143 |
| 6  | 226.1412 | 15952 | 56.7  | 9038   | 0.0142 |
| 7  | 228.0986 | 18038 | 105.2 | 16697  | 0.0126 |
| 8  | 239.1538 | 16591 | 376.1 | 58500  | 0.0144 |
| 9  | 240.1561 | 17710 | 41.8  | 6493   | 0.0136 |
| 10 | 241.1328 | 16615 | 61.0  | 9450   | 0.0145 |
| 11 | 255.1460 | 16978 | 39.8  | 6648   | 0.0150 |
| 12 | 268.1919 | 17598 | 31.6  | 5775   | 0.0152 |
| 13 | 272.1429 | 17629 | 216.1 | 40508  | 0.0154 |
| 14 | 273.1458 | 17335 | 28.3  | 5334   | 0.0158 |
| 15 | 274.1407 | 16187 | 280.4 | 53239  | 0.0169 |
| 16 | 301.1694 | 18141 | 127.4 | 22271  | 0.0166 |
| 17 | 308.1388 | 17522 | 48.0  | 7941   | 0.0176 |
| 18 | 311.1538 | 18127 | 82.7  | 13006  | 0.0172 |
| 19 | 345.2532 | 17941 | 43.5  | 5936   | 0.0192 |
| 20 | 367.1818 | 15270 | 783.8 | 198330 | 0.0240 |
| 21 | 368.1843 | 17310 | 187.9 | 47603  | 0.0213 |
| 22 | 369.1960 | 16446 | 209.4 | 53085  | 0.0224 |
| 23 | 370.2000 | 17577 | 35.7  | 9060   | 0.0211 |
| 24 | 378.2902 | 17490 | 25.3  | 6468   | 0.0216 |
| 25 | 389.1641 | 14702 | 939.3 | 243049 | 0.0265 |
| 26 | 390.1666 | 17195 | 247.6 | 64122  | 0.0227 |
| 27 | 398.1873 | 17201 | 66.0  | 17098  | 0.0231 |
| 28 | 405.1379 | 15544 | 645.6 | 145483 | 0.0261 |
| 29 | 406.1402 | 17998 | 150.6 | 33206  | 0.0226 |
| 30 | 407.1383 | 16223 | 35.5  | 7651   | 0.0251 |

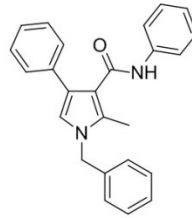

**4a(vii)**

m/z: Calc'd for C<sub>25</sub>H<sub>22</sub>N<sub>2</sub>NaO  
 ([M+Na]<sup>+</sup>): 389.1630, found: 389.1641

## Mass Spectrum List Report

**Analysis Info**

Analysis Name D:\Data\vipin\14-02-04-SG-4-B-1.d  
 Method sodium formate tune\_low.m  
 Sample Name SG-4-B-1  
 Comment

Acquisition Date 2/4/2014 4:05:53 PM

Operator VIKAS GROVER  
 Instrument / Ser# maXis 40

**Acquisition Parameter**

|             |            |                       |           |                  |           |
|-------------|------------|-----------------------|-----------|------------------|-----------|
| Source Type | ESI        | Ion Polarity          | Positive  | Set Nebulizer    | 1.2 Bar   |
| Focus       | Not active | Set Capillary         | 4500 V    | Set Dry Heater   | 180 °C    |
| Scan Begin  | 50 m/z     | Set End Plate Offset  | -500 V    | Set Dry Gas      | 7.0 l/min |
| Scan End    | 400 m/z    | Set Collision Cell RF | 300.0 Vpp | Set Divert Valve | Source    |

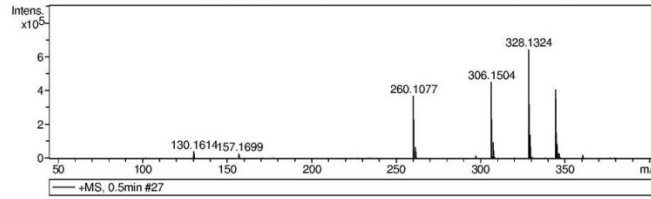

| #  | m/z      | Res.  | S/N    | I      | FWHM   |
|----|----------|-------|--------|--------|--------|
| 1  | 102.1349 | 17305 | 165.3  | 5848   | 0.0059 |
| 2  | 130.1614 | 15241 | 358.4  | 43095  | 0.0085 |
| 3  | 143.1550 | 16267 | 22.5   | 3010   | 0.0088 |
| 4  | 157.1699 | 17245 | 223.1  | 29449  | 0.0091 |
| 5  | 171.1845 | 15812 | 54.3   | 4989   | 0.0108 |
| 6  | 177.1377 | 16240 | 49.3   | 3708   | 0.0109 |
| 7  | 191.1530 | 16588 | 39.3   | 2761   | 0.0115 |
| 8  | 227.1379 | 17077 | 29.0   | 3205   | 0.0133 |
| 9  | 233.2001 | 18584 | 52.1   | 6642   | 0.0125 |
| 10 | 235.1217 | 17300 | 37.3   | 4963   | 0.0136 |
| 11 | 260.1077 | 14459 | 1836.5 | 367896 | 0.0180 |
| 12 | 261.1106 | 15880 | 326.1  | 66150  | 0.0164 |
| 13 | 262.1129 | 17410 | 17.3   | 3563   | 0.0151 |
| 14 | 297.1391 | 18167 | 58.4   | 15650  | 0.0164 |
| 15 | 306.1504 | 14808 | 1648.6 | 450047 | 0.0207 |
| 16 | 307.1533 | 15735 | 352.9  | 96538  | 0.0195 |
| 17 | 308.1575 | 15982 | 32.8   | 8979   | 0.0193 |
| 18 | 320.1286 | 17659 | 11.5   | 3231   | 0.0181 |
| 19 | 328.1324 | 14787 | 2214.2 | 642727 | 0.0222 |
| 20 | 329.1356 | 15170 | 482.9  | 140803 | 0.0217 |
| 21 | 330.1372 | 17686 | 35.9   | 10511  | 0.0187 |
| 22 | 338.1392 | 17139 | 19.8   | 6013   | 0.0197 |
| 23 | 344.1064 | 14821 | 1302.9 | 405098 | 0.0232 |
| 24 | 345.1092 | 16038 | 281.4  | 87592  | 0.0215 |
| 25 | 346.1058 | 16124 | 98.0   | 30064  | 0.0215 |
| 26 | 347.1074 | 16177 | 10.4   | 3145   | 0.0215 |
| 27 | 360.1208 | 17906 | 81.7   | 19924  | 0.0201 |
| 28 | 361.1235 | 17066 | 10.8   | 2592   | 0.0212 |
| 29 | 376.1027 | 9340  | 29.8   | 4896   | 0.0403 |
| 30 | 379.2374 | 17143 | 32.4   | 4762   | 0.0221 |

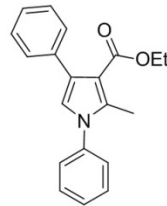

**4b(i)**

m/z: Calc'd for C<sub>20</sub>H<sub>19</sub>NNaO<sub>2</sub>  
 ([M+Na]<sup>+</sup>): 328.1313, found: 328.1324.

# Mass Spectrum List Report

**Analysis Info**

Analysis Name D:\Data\vipin\14-01-20-SRM-54.d  
 Method sodium formate tune\_low.m  
 Sample Name SRM-54  
 Comment

Acquisition Date 1/20/2014 3:57:00 PM

Operator VIKAS GROVER  
 Instrument / Ser# maXis 40

**Acquisition Parameter**

|             |            |                       |           |                  |           |
|-------------|------------|-----------------------|-----------|------------------|-----------|
| Source Type | ESI        | Ion Polarity          | Positive  | Set Nebulizer    | 1.2 Bar   |
| Focus       | Not active | Set Capillary         | 4500 V    | Set Dry Heater   | 180 °C    |
| Scan Begin  | 50 m/z     | Set End Plate Offset  | -500 V    | Set Dry Gas      | 7.0 l/min |
| Scan End    | 500 m/z    | Set Collision Cell RF | 300.0 Vpp | Set Divert Valve | Source    |

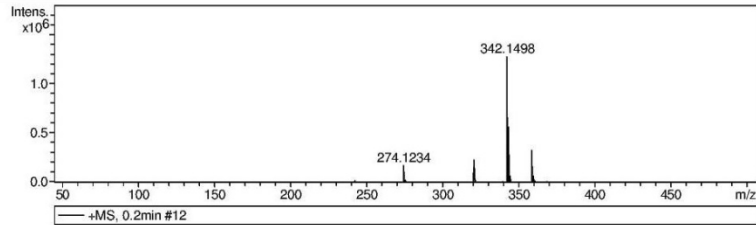

| #  | m/z      | Res.  | S/N     | I       | FWHM   |
|----|----------|-------|---------|---------|--------|
| 1  | 194.1158 | 17075 | 56.8    | 3319    | 0.0114 |
| 2  | 208.1316 | 17497 | 73.0    | 4702    | 0.0119 |
| 3  | 220.1316 | 16127 | 39.8    | 2933    | 0.0136 |
| 4  | 226.9505 | 16842 | 29.9    | 2420    | 0.0135 |
| 5  | 234.1263 | 16773 | 28.8    | 2551    | 0.0140 |
| 6  | 241.0625 | 16680 | 34.8    | 3348    | 0.0145 |
| 7  | 242.1143 | 16962 | 169.8   | 16511   | 0.0143 |
| 8  | 274.1234 | 14899 | 1624.0  | 175309  | 0.0184 |
| 9  | 275.1259 | 17856 | 289.6   | 27604   | 0.0154 |
| 10 | 302.0999 | 16531 | 16.2    | 1708    | 0.0183 |
| 11 | 320.1660 | 15094 | 2411.8  | 227007  | 0.0212 |
| 12 | 321.1684 | 17130 | 478.2   | 44589   | 0.0187 |
| 13 | 322.1712 | 16527 | 32.4    | 2997    | 0.0195 |
| 14 | 323.1257 | 17116 | 51.6    | 4727    | 0.0189 |
| 15 | 339.1389 | 18697 | 112.9   | 10392   | 0.0181 |
| 16 | 339.6404 | 17349 | 42.2    | 3985    | 0.0196 |
| 17 | 342.1498 | 10041 | 12060.7 | 1272712 | 0.0341 |
| 18 | 342.2980 | 7459  | 53.7    | 5706    | 0.0459 |
| 19 | 343.1511 | 14961 | 5099.0  | 561117  | 0.0229 |
| 20 | 344.1532 | 16516 | 562.2   | 64420   | 0.0208 |
| 21 | 345.1553 | 16697 | 22.5    | 2684    | 0.0207 |
| 22 | 358.1214 | 14463 | 1763.1  | 313102  | 0.0248 |
| 23 | 359.1240 | 17067 | 389.7   | 70977   | 0.0210 |
| 24 | 360.1209 | 16803 | 115.7   | 21587   | 0.0214 |
| 25 | 361.1222 | 15506 | 12.0    | 2300    | 0.0233 |
| 26 | 368.1462 | 18477 | 52.6    | 11219   | 0.0199 |
| 27 | 386.1568 | 16193 | 24.2    | 3232    | 0.0238 |
| 28 | 391.1610 | 15970 | 16.9    | 1879    | 0.0245 |
| 29 | 400.1706 | 17846 | 73.9    | 5982    | 0.0224 |
| 30 | 413.2630 | 17999 | 64.1    | 4691    | 0.0230 |

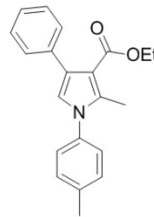

4b(ii)

m/z: Calc'd for C<sub>21</sub>H<sub>21</sub>NNaO<sub>2</sub>  
 ([M+Na]<sup>+</sup>): 342.1470, found: 342.1498.

## Mass Spectrum List Report

|                      |                                  |                   |                      |
|----------------------|----------------------------------|-------------------|----------------------|
| <b>Analysis Info</b> |                                  | Acquisition Date  | 4/9/2013 12:37:21 PM |
| Analysis Name        | D:\Data\vipin\813-04-00-MCR-25.d | Operator          | VIKAS GROVER         |
| Method               | sodium formate tune_low.m        | Instrument / Ser# | maXis 40             |
| Sample Name          | MCR-25                           |                   |                      |
| Comment              |                                  |                   |                      |

|                              |            |                       |           |                  |           |
|------------------------------|------------|-----------------------|-----------|------------------|-----------|
| <b>Acquisition Parameter</b> |            |                       |           |                  |           |
| Source Type                  | ESI        | Ion Polarity          | Positive  | Set Nebulizer    | 1.2 Bar   |
| Focus                        | Not active | Set Capillary         | 4500 V    | Set Dry Heater   | 180 °C    |
| Scan Begin                   | 50 m/z     | Set End Plate Offset  | -500 V    | Set Dry Gas      | 7.0 l/min |
| Scan End                     | 500 m/z    | Set Collision Cell RF | 300.0 Vpp | Set Divert Valve | Source    |

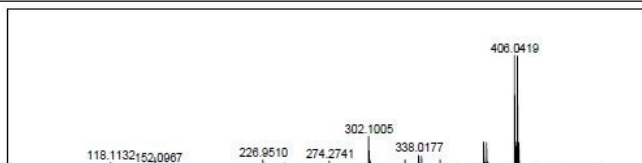

| #  | m/z      | Res.  | S/N    | I       | FWHM   |
|----|----------|-------|--------|---------|--------|
| 1  | 118.1132 | 17451 | 6402.5 | 44520   | 0.0068 |
| 2  | 152.0967 | 16577 | 1894.1 | 24788   | 0.0082 |
| 3  | 226.9510 | 20206 | 3084.9 | 70826   | 0.0112 |
| 4  | 242.0784 | 19609 | 1476.2 | 38926   | 0.0123 |
| 5  | 274.2741 | 19083 | 1910.2 | 56858   | 0.0137 |
| 6  | 302.1005 | 17836 | 5759.9 | 304580  | 0.0169 |
| 7  | 328.1308 | 20379 | 1546.8 | 72830   | 0.0161 |
| 8  | 338.0177 | 20060 | 2647.0 | 115596  | 0.0169 |
| 9  | 353.2663 | 20678 | 1737.4 | 72250   | 0.0171 |
| 10 | 384.0597 | 18962 | 1920.0 | 249855  | 0.0203 |
| 11 | 406.0419 | 17851 | 6774.8 | 1098610 | 0.0227 |
| 12 | 406.8610 | 5212  | 0.7    | 105     | 0.0761 |
| 13 | 407.0449 | 19001 | 1595.7 | 250753  | 0.0214 |
| 14 | 408.0400 | 17794 | 7137.1 | 1087889 | 0.0229 |
| 15 | 409.0428 | 18597 | 1617.8 | 238888  | 0.0220 |

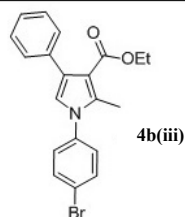

m/z: Calc'd for C<sub>20</sub>H<sub>18</sub>BrNNaO<sub>2</sub>  
 ([M+Na]<sup>+</sup>): 406.0419, found: 406.0419.

## Mass Spectrum List Report

**Analysis Info**

Analysis Name D:\Data\vipin\13-06-19-MCR-32.d  
 Method sodium formate tune\_low.m  
 Sample Name MCR-32  
 Comment

Acquisition Date 6/19/2013 1:52:16 PM

Operator VIKAS GROVER  
 Instrument / Ser# maXis 40

**Acquisition Parameter**

|             |            |                       |           |                  |           |
|-------------|------------|-----------------------|-----------|------------------|-----------|
| Source Type | ESI        | Ion Polarity          | Positive  | Set Nebulizer    | 1.2 Bar   |
| Focus       | Not active | Set Capillary         | 4500 V    | Set Dry Heater   | 180 °C    |
| Scan Begin  | 50 m/z     | Set End Plate Offset  | -500 V    | Set Dry Gas      | 7.0 l/min |
| Scan End    | 500 m/z    | Set Collision Cell RF | 300.0 Vpp | Set Divert Valve | Source    |

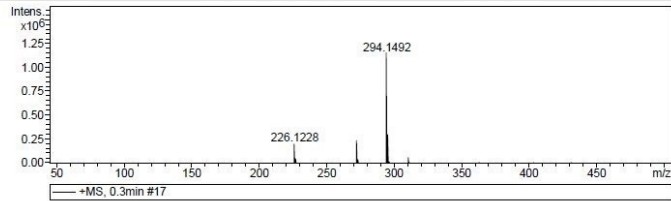

| #  | m/z      | Res.  | S/N    | I       | FWHM   |
|----|----------|-------|--------|---------|--------|
| 1  | 118.1087 | 16924 | 65.5   | 2088    | 0.0070 |
| 2  | 158.9578 | 20183 | 136.7  | 3508    | 0.0079 |
| 3  | 184.0721 | 19094 | 88.9   | 1729    | 0.0096 |
| 4  | 226.1228 | 15985 | 5032.4 | 200971  | 0.0141 |
| 5  | 226.9510 | 17453 | 1153.8 | 45159   | 0.0130 |
| 6  | 227.1255 | 16988 | 617.9  | 24080   | 0.0134 |
| 7  | 240.9668 | 18025 | 56.7   | 1453    | 0.0134 |
| 8  | 272.1658 | 15751 | 2522.2 | 239196  | 0.0173 |
| 9  | 273.1687 | 17148 | 370.6  | 36112   | 0.0159 |
| 10 | 274.1703 | 19257 | 17.5   | 1755    | 0.0142 |
| 11 | 278.1727 | 18773 | 11.5   | 1506    | 0.0148 |
| 12 | 284.1638 | 18876 | 12.0   | 2217    | 0.0151 |
| 13 | 294.1492 | 11953 | 4173.1 | 1139620 | 0.0246 |
| 14 | 295.1514 | 15529 | 1052.9 | 296927  | 0.0190 |
| 15 | 296.1531 | 19757 | 69.8   | 20299   | 0.0150 |
| 16 | 310.1220 | 16482 | 191.1  | 62886   | 0.0188 |
| 17 | 311.1241 | 19376 | 22.7   | 7253    | 0.0161 |
| 18 | 326.1364 | 19993 | 20.8   | 3463    | 0.0163 |
| 19 | 359.2335 | 18524 | 27.8   | 2209    | 0.0194 |
| 20 | 362.9266 | 20072 | 107.1  | 8778    | 0.0181 |
| 21 | 381.1958 | 19331 | 16.8   | 1341    | 0.0197 |
| 22 | 396.1785 | 19382 | 24.9   | 1871    | 0.0204 |
| 23 | 403.1782 | 20503 | 127.9  | 9374    | 0.0197 |
| 24 | 404.1802 | 19780 | 22.5   | 1646    | 0.0204 |
| 25 | 411.2489 | 18828 | 21.4   | 1525    | 0.0218 |
| 26 | 430.9134 | 21169 | 106.3  | 6801    | 0.0204 |
| 27 | 498.9011 | 21791 | 61.4   | 1878    | 0.0229 |

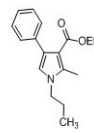

**4b(iv)**

m/z: Calc'd for C<sub>17</sub>H<sub>21</sub>NNaO<sub>2</sub>  
 {[M+Na]<sup>+</sup>}: 294.1470, found: 294.1492.



## Mass Spectrum List Report

**Analysis Info**

Analysis Name D:\Data\vipin\14-01-15-BK-74-B.d  
 Method sodium formate tune\_low.m  
 Sample Name BK-74-B  
 Comment

Acquisition Date 1/15/2014 9:49:50 AM

Operator VIKAS GROVER  
 Instrument / Ser# maXis 40

**Acquisition Parameter**

|             |            |                       |           |                  |           |
|-------------|------------|-----------------------|-----------|------------------|-----------|
| Source Type | ESI        | Ion Polarity          | Positive  | Set Nebulizer    | 1.2 Bar   |
| Focus       | Not active | Set Capillary         | 4500 V    | Set Dry Heater   | 180 °C    |
| Scan Begin  | 50 m/z     | Set End Plate Offset  | -500 V    | Set Dry Gas      | 7.0 l/min |
| Scan End    | 600 m/z    | Set Collision Cell RF | 300.0 Vpp | Set Divert Valve | Source    |

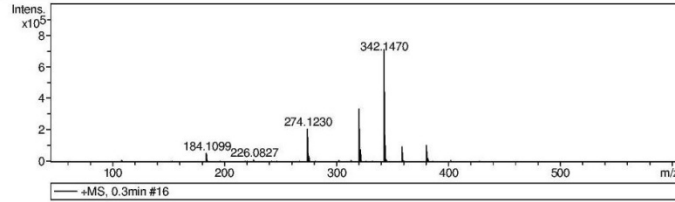

| #  | m/z      | Res.  | S/N    | I      | FWHM   |
|----|----------|-------|--------|--------|--------|
| 1  | 108.0730 | 16542 | 186.9  | 9054   | 0.0065 |
| 2  | 153.1348 | 15286 | 58.5   | 6045   | 0.0100 |
| 3  | 184.1099 | 16100 | 397.0  | 55954  | 0.0114 |
| 4  | 185.1128 | 15328 | 44.7   | 6279   | 0.0121 |
| 5  | 196.1101 | 16715 | 39.4   | 5332   | 0.0117 |
| 6  | 218.2101 | 15907 | 63.2   | 7732   | 0.0137 |
| 7  | 220.1318 | 17113 | 61.5   | 7429   | 0.0129 |
| 8  | 226.0827 | 17764 | 124.7  | 14391  | 0.0127 |
| 9  | 246.2419 | 16806 | 80.7   | 7856   | 0.0147 |
| 10 | 267.1848 | 16921 | 33.0   | 5042   | 0.0158 |
| 11 | 274.1230 | 14823 | 1185.0 | 209893 | 0.0185 |
| 12 | 274.2739 | 16122 | 377.8  | 67110  | 0.0170 |
| 13 | 275.1257 | 16254 | 204.6  | 36956  | 0.0169 |
| 14 | 275.2766 | 16523 | 42.2   | 7650   | 0.0167 |
| 15 | 281.1338 | 17708 | 25.4   | 5134   | 0.0159 |
| 16 | 302.3048 | 17434 | 66.0   | 10544  | 0.0173 |
| 17 | 313.1042 | 17752 | 82.8   | 9226   | 0.0176 |
| 18 | 320.1651 | 14262 | 4096.1 | 326532 | 0.0224 |
| 19 | 321.1680 | 16094 | 1025.4 | 77139  | 0.0200 |
| 20 | 322.1701 | 16865 | 80.1   | 5674   | 0.0191 |
| 21 | 326.1724 | 17524 | 123.2  | 7862   | 0.0186 |
| 22 | 342.1470 | 14173 | 4502.0 | 684234 | 0.0241 |
| 23 | 343.1502 | 15266 | 1073.9 | 169174 | 0.0225 |
| 24 | 344.1521 | 17486 | 93.8   | 15300  | 0.0197 |
| 25 | 356.1206 | 15944 | 400.3  | 96173  | 0.0225 |
| 26 | 359.1230 | 17918 | 63.8   | 15692  | 0.0200 |
| 27 | 380.1859 | 15800 | 539.3  | 107238 | 0.0241 |
| 28 | 381.1887 | 18111 | 113.6  | 22163  | 0.0210 |
| 29 | 402.1666 | 18216 | 77.7   | 9529   | 0.0221 |
| 30 | 427.2371 | 18315 | 97.9   | 7502   | 0.0233 |

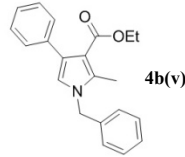

m/z: Calc'd for C<sub>21</sub>H<sub>21</sub>NNaO<sub>2</sub>  
 ([[M+Na]<sup>+</sup>): 342.1470, found: 342.1470.

# Mass Spectrum List Report

## Analysis Info

Analysis Name D:\Data\vipin\13-08-27-MCR-39.d  
 Method sodium formate tune\_low.m  
 Sample Name MCR-39  
 Comment

Acquisition Date 8/29/2013 11:21:04 AM

Operator VIKAS GROVER  
 Instrument / Ser# maXis 40

## Acquisition Parameter

|             |            |                       |           |                  |           |
|-------------|------------|-----------------------|-----------|------------------|-----------|
| Source Type | ESI        | Ion Polarity          | Positive  | Set Nebulizer    | 1.2 Bar   |
| Focus       | Not active | Set Capillary         | 4500 V    | Set Dry Heater   | 180 °C    |
| Scan Begin  | 50 m/z     | Set End Plate Offset  | -500 V    | Set Dry Gas      | 7.0 l/min |
| Scan End    | 500 m/z    | Set Collision Cell RF | 300.0 Vpp | Set Divert Valve | Source    |

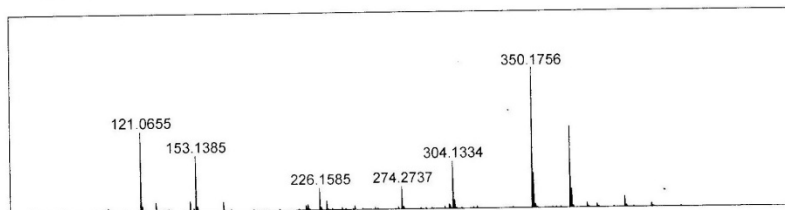

+MS, 0.6min #38

| #  | m/z      | Res.  | S/N    | I      | FWHM   |
|----|----------|-------|--------|--------|--------|
| 1  | 121.0655 | 15077 | 1715.8 | 339417 | 0.0080 |
| 2  | 130.1592 | 15882 | 143.8  | 38386  | 0.0082 |
| 3  | 153.1385 | 15779 | 543.9  | 234955 | 0.0097 |
| 4  | 169.1329 | 15861 | 118.1  | 37672  | 0.0107 |
| 5  | 219.1483 | 17744 | 60.7   | 24747  | 0.0124 |
| 6  | 226.1585 | 16800 | 243.9  | 93679  | 0.0135 |
| 7  | 230.2473 | 17931 | 103.3  | 38237  | 0.0128 |
| 8  | 274.2737 | 17189 | 221.3  | 97163  | 0.0160 |
| 9  | 304.1334 | 16666 | 371.8  | 200446 | 0.0182 |
| 10 | 350.1756 | 16224 | 1362.2 | 592239 | 0.0216 |
| 11 | 351.1787 | 17665 | 338.0  | 147615 | 0.0199 |
| 12 | 352.1810 | 18392 | 35.3   | 15501  | 0.0191 |
| 13 | 372.1576 | 16694 | 782.5  | 346882 | 0.0223 |
| 14 | 373.1604 | 18048 | 182.1  | 79924  | 0.0207 |
| 15 | 374.1629 | 18320 | 17.8   | 7745   | 0.0204 |
| 16 | 382.1649 | 18593 | 54.6   | 21733  | 0.0206 |
| 17 | 388.1331 | 12073 | 34.5   | 12820  | 0.0321 |
| 18 | 404.1468 | 18935 | 162.7  | 48167  | 0.0213 |
| 19 | 420.1406 | 19369 | 67.5   | 14679  | 0.0217 |
| 20 | 437.1932 | 18468 | 25.8   | 3899   | 0.0237 |

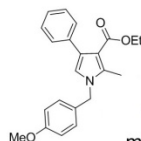

**4b(vi)**

m/z: Calc'd for C<sub>22</sub>H<sub>23</sub>NNaO<sub>3</sub>  
 ([M+Na]<sup>+</sup>): 372.1576, found: 372.1576

## Mass Spectrum List Report

|                      |                                 |                   |                      |
|----------------------|---------------------------------|-------------------|----------------------|
| <b>Analysis Info</b> |                                 | Acquisition Date  | 4/10/2013 9:21:42 AM |
| Analysis Name        | D:\Data\vipin\13-04-10-MCR-27.d | Operator          | VIKAS GROVER         |
| Method               | sodium formate tune_low.m       | Instrument / Ser# | maXis 40             |
| Sample Name          | MCR-27                          |                   |                      |
| Comment              |                                 |                   |                      |

|                              |            |                       |           |                  |           |
|------------------------------|------------|-----------------------|-----------|------------------|-----------|
| <b>Acquisition Parameter</b> |            |                       |           |                  |           |
| Source Type                  | ESI        | Ion Polarity          | Positive  | Set Nebulizer    | 1.2 Bar   |
| Focus                        | Not active | Set Capillary         | 4500 V    | Set Dry Heater   | 180 °C    |
| Scan Begin                   | 50 m/z     | Set End Plate Offset  | -500 V    | Set Dry Gas      | 7.0 l/min |
| Scan End                     | 500 m/z    | Set Collision Cell RF | 300.0 Vpp | Set Divert Valve | Source    |

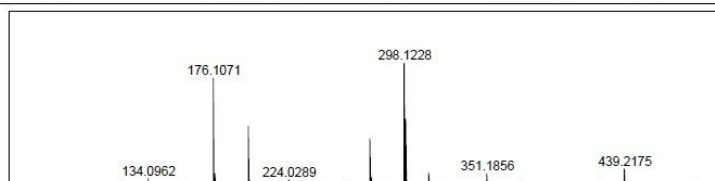

— +MS, 0.9min #54

| #  | m/z      | Res.  | S/N     | I       | FWHM   |
|----|----------|-------|---------|---------|--------|
| 1  | 134.0962 | 17896 | 5864.5  | 91136   | 0.0075 |
| 2  | 158.0958 | 17374 | 1609.3  | 33546   | 0.0091 |
| 3  | 176.1071 | 15525 | 31901.4 | 1120993 | 0.0113 |
| 4  | 198.0889 | 16865 | 17680.0 | 631911  | 0.0117 |
| 5  | 224.0289 | 19320 | 2517.3  | 76392   | 0.0116 |
| 6  | 234.1271 | 20611 | 1282.6  | 38372   | 0.0114 |
| 7  | 276.1384 | 17542 | 9897.3  | 497247  | 0.0157 |
| 8  | 298.1228 | 10174 | 15843.5 | 1274989 | 0.0293 |
| 9  | 314.0942 | 19136 | 1962.8  | 146381  | 0.0164 |
| 10 | 351.1856 | 19178 | 4650.9  | 143881  | 0.0183 |
| 11 | 373.1881 | 20741 | 1277.1  | 35422   | 0.0180 |
| 12 | 425.0695 | 21423 | 488.5   | 18673   | 0.0198 |
| 13 | 439.2175 | 19478 | 6048.3  | 188984  | 0.0225 |

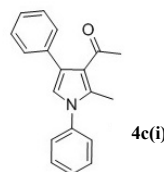

m/z: Calc'd for C<sub>19</sub>H<sub>17</sub>NNaO  
 ([M+Na]<sup>+</sup>): 298.1208, found: 298.1228.

## Mass Spectrum List Report

**Analysis Info**

Analysis Name D:\Data\vipin\14-02-03-BK-76.d  
 Method sodium formate tune\_low.m  
 Sample Name BK-76  
 Comment

Acquisition Date 2/3/2014 11:11:21 AM

Operator VIKAS GROVER  
 Instrument / Ser# maXis 40

**Acquisition Parameter**

|             |            |                       |           |                  |           |
|-------------|------------|-----------------------|-----------|------------------|-----------|
| Source Type | ESI        | Ion Polarity          | Positive  | Set Nebulizer    | 1.2 Bar   |
| Focus       | Not active | Set Capillary         | 4500 V    | Set Dry Heater   | 180 °C    |
| Scan Begin  | 50 m/z     | Set End Plate Offset  | -500 V    | Set Dry Gas      | 7.0 l/min |
| Scan End    | 500 m/z    | Set Collision Cell RF | 300.0 Vpp | Set Divert Valve | Source    |

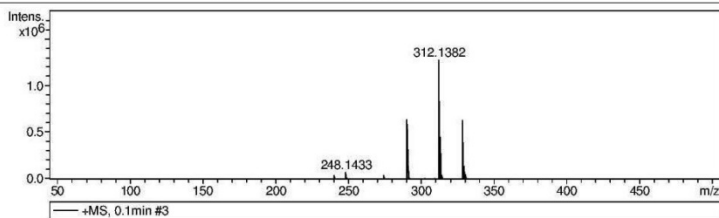

| #  | m/z      | Res.  | S/N     | I       | FWHM   |
|----|----------|-------|---------|---------|--------|
| 1  | 218.0809 | 15524 | 44.3    | 2674    | 0.0140 |
| 2  | 218.2107 | 15917 | 56.3    | 3423    | 0.0137 |
| 3  | 240.0628 | 16981 | 320.0   | 42584   | 0.0141 |
| 4  | 241.0660 | 16745 | 24.0    | 3276    | 0.0144 |
| 5  | 246.2425 | 16877 | 27.0    | 3903    | 0.0146 |
| 6  | 247.1343 | 17605 | 13.6    | 1946    | 0.0140 |
| 7  | 248.1433 | 16347 | 556.4   | 79054   | 0.0152 |
| 8  | 249.1461 | 17725 | 68.7    | 9677    | 0.0141 |
| 9  | 256.0366 | 18082 | 17.1    | 2262    | 0.0142 |
| 10 | 274.2741 | 17026 | 379.9   | 41355   | 0.0161 |
| 11 | 275.2770 | 17503 | 42.0    | 4525    | 0.0157 |
| 12 | 290.1550 | 15224 | 6658.2  | 636854  | 0.0191 |
| 13 | 291.1581 | 15479 | 1507.5  | 142972  | 0.0188 |
| 14 | 292.1602 | 18195 | 108.3   | 10192   | 0.0161 |
| 15 | 302.3053 | 18912 | 95.8    | 8226    | 0.0160 |
| 16 | 309.1277 | 18757 | 63.6    | 6520    | 0.0165 |
| 17 | 309.6289 | 16737 | 25.4    | 2683    | 0.0185 |
| 18 | 312.1382 | 11288 | 10712.0 | 1272729 | 0.0277 |
| 19 | 312.2734 | 5262  | 32.4    | 3886    | 0.0593 |
| 20 | 313.1403 | 15215 | 3602.3  | 447768  | 0.0206 |
| 21 | 314.1425 | 17369 | 342.3   | 44436   | 0.0181 |
| 22 | 315.1447 | 16155 | 12.6    | 1714    | 0.0195 |
| 23 | 318.2992 | 17014 | 11.7    | 1794    | 0.0187 |
| 24 | 328.1110 | 15377 | 3058.0  | 630758  | 0.0213 |
| 25 | 329.1141 | 15592 | 651.9   | 138050  | 0.0211 |
| 26 | 330.1106 | 15705 | 233.7   | 50764   | 0.0210 |
| 27 | 330.3365 | 17168 | 10.7    | 2348    | 0.0192 |
| 28 | 331.1117 | 16746 | 24.9    | 5544    | 0.0198 |
| 29 | 453.7020 | 19099 | 75.8    | 4334    | 0.0238 |
| 30 | 454.2030 | 18548 | 51.4    | 2955    | 0.0245 |

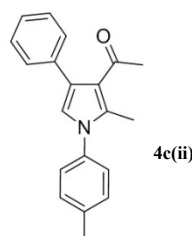

m/z: Calc'd for C<sub>20</sub>H<sub>19</sub>NNaO  
 ([M+Na]<sup>+</sup>): 312.1364, found: 312.1382.

## Mass Spectrum List Report

**Analysis Info**

Analysis Name D:\Data\vipin\14-01-15-BK-77.d  
 Method sodium formate tune\_low.m  
 Sample Name BK-77  
 Comment

Acquisition Date 1/15/2014 9:42:36 AM

Operator VIKAS GROVER  
 Instrument / Ser# maXis 40

**Acquisition Parameter**

|             |            |                       |           |                  |           |
|-------------|------------|-----------------------|-----------|------------------|-----------|
| Source Type | ESI        | Ion Polarity          | Positive  | Set Nebulizer    | 1.2 Bar   |
| Focus       | Not active | Set Capillary         | 4500 V    | Set Dry Heater   | 180 °C    |
| Scan Begin  | 50 m/z     | Set End Plate Offset  | -500 V    | Set Dry Gas      | 7.0 l/min |
| Scan End    | 600 m/z    | Set Collision Cell RF | 300.0 Vpp | Set Divert Valve | Source    |

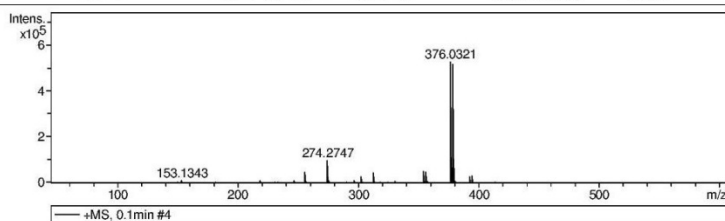

| #  | m/z      | Res.  | S/N    | I      | FWHM   |
|----|----------|-------|--------|--------|--------|
| 1  | 150.0997 | 16418 | 41.9   | 3332   | 0.0091 |
| 2  | 153.1343 | 16428 | 140.3  | 11010  | 0.0093 |
| 3  | 218.2102 | 16792 | 86.8   | 9358   | 0.0130 |
| 4  | 246.2425 | 17382 | 60.8   | 10445  | 0.0142 |
| 5  | 255.1469 | 16689 | 253.2  | 46113  | 0.0153 |
| 6  | 256.1496 | 15998 | 24.0   | 4381   | 0.0160 |
| 7  | 257.0240 | 16855 | 25.4   | 4639   | 0.0152 |
| 8  | 274.2747 | 15596 | 525.7  | 97861  | 0.0176 |
| 9  | 275.2775 | 17430 | 67.2   | 12526  | 0.0158 |
| 10 | 296.2562 | 17392 | 58.1   | 10840  | 0.0170 |
| 11 | 302.3056 | 17877 | 147.1  | 27231  | 0.0169 |
| 12 | 303.3086 | 17458 | 19.1   | 3524   | 0.0174 |
| 13 | 312.1364 | 17561 | 241.5  | 44064  | 0.0178 |
| 14 | 313.1394 | 17109 | 33.8   | 6153   | 0.0183 |
| 15 | 318.3004 | 17613 | 24.0   | 4334   | 0.0181 |
| 16 | 330.3368 | 17363 | 53.6   | 8796   | 0.0190 |
| 17 | 354.0494 | 17222 | 512.3  | 49865  | 0.0206 |
| 18 | 355.0519 | 18328 | 70.3   | 6652   | 0.0194 |
| 19 | 356.0475 | 17199 | 533.3  | 48906  | 0.0207 |
| 20 | 357.0503 | 17624 | 70.5   | 6276   | 0.0203 |
| 21 | 376.0321 | 15061 | 5851.4 | 525711 | 0.0250 |
| 22 | 377.0351 | 15895 | 1214.9 | 110504 | 0.0237 |
| 23 | 378.0302 | 15101 | 5590.4 | 515513 | 0.0250 |
| 24 | 379.0330 | 15921 | 1134.2 | 105948 | 0.0238 |
| 25 | 380.0350 | 18002 | 72.9   | 6902   | 0.0211 |
| 26 | 392.0050 | 18440 | 265.7  | 28908  | 0.0213 |
| 27 | 393.0080 | 16539 | 32.5   | 3571   | 0.0238 |
| 28 | 394.0033 | 17852 | 284.2  | 31588  | 0.0221 |
| 29 | 395.0056 | 17867 | 37.2   | 4178   | 0.0221 |
| 30 | 413.2659 | 17735 | 47.6   | 4303   | 0.0233 |

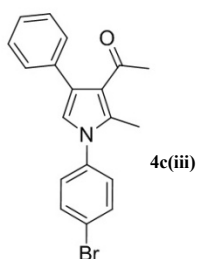

m/z: Calc'd for C<sub>19</sub>H<sub>16</sub>BrNNaO  
 ([M+Na]<sup>+</sup>): 376.0313, found: 376.0321.

## Mass Spectrum List Report

**Analysis Info**

Analysis Name D:\Data\vipin\14-02-04-SG-252.d  
 Method sodium formate tune\_low.m  
 Sample Name SG-252  
 Comment

Acquisition Date 2/4/2014 3:26:34 PM

Operator VIKAS GROVER  
 Instrument / Ser# maXis 40

**Acquisition Parameter**

|             |            |                       |           |                  |           |
|-------------|------------|-----------------------|-----------|------------------|-----------|
| Source Type | ESI        | Ion Polarity          | Positive  | Set Nebulizer    | 1.2 Bar   |
| Focus       | Not active | Set Capillary         | 4500 V    | Set Dry Heater   | 180 °C    |
| Scan Begin  | 50 m/z     | Set End Plate Offset  | -500 V    | Set Dry Gas      | 7.0 l/min |
| Scan End    | 400 m/z    | Set Collision Cell RF | 300.0 Vpp | Set Divert Valve | Source    |

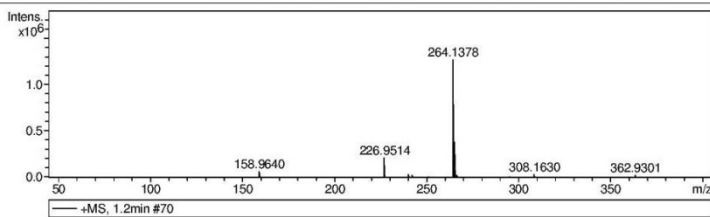

| #  | m/z      | Res.  | S/N    | I       | FWHM   |
|----|----------|-------|--------|---------|--------|
| 1  | 90.9769  | 17713 | 127.3  | 2077    | 0.0051 |
| 2  | 158.9640 | 14977 | 1520.0 | 63144   | 0.0106 |
| 3  | 200.1425 | 15846 | 77.3   | 2922    | 0.0126 |
| 4  | 202.1193 | 16941 | 41.0   | 1656    | 0.0119 |
| 5  | 219.1346 | 17134 | 50.3   | 3628    | 0.0128 |
| 6  | 226.9514 | 13939 | 2518.8 | 210950  | 0.0163 |
| 7  | 227.9538 | 16862 | 42.4   | 3567    | 0.0135 |
| 8  | 240.0624 | 17131 | 385.7  | 34197   | 0.0140 |
| 9  | 240.9659 | 16075 | 21.5   | 1911    | 0.0150 |
| 10 | 241.0654 | 16642 | 26.3   | 2346    | 0.0145 |
| 11 | 242.1533 | 17289 | 254.2  | 22738   | 0.0140 |
| 12 | 243.1562 | 16225 | 26.4   | 2373    | 0.0150 |
| 13 | 251.0856 | 16690 | 49.6   | 6237    | 0.0150 |
| 14 | 264.1378 | 10036 | 3823.8 | 1271104 | 0.0263 |
| 15 | 265.1397 | 14031 | 1103.0 | 384138  | 0.0189 |
| 16 | 266.1419 | 16955 | 83.0   | 30213   | 0.0157 |
| 17 | 294.9390 | 18404 | 52.0   | 11967   | 0.0160 |
| 18 | 301.1415 | 15959 | 11.2   | 2079    | 0.0189 |
| 19 | 308.1630 | 17514 | 223.2  | 33218   | 0.0176 |
| 20 | 309.1660 | 15983 | 25.0   | 3593    | 0.0193 |
| 21 | 332.1247 | 17665 | 31.2   | 2052    | 0.0188 |
| 22 | 362.9301 | 18232 | 167.0  | 28595   | 0.0199 |
| 23 | 363.1676 | 16192 | 35.2   | 6079    | 0.0200 |

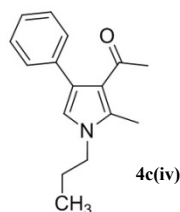

m/z: Calc'd for C<sub>16</sub>H<sub>19</sub>NNaO  
 ([M+Na]<sup>+</sup>): 264.1364, found: 264.1378.

## Mass Spectrum List Report

**Analysis Info**

Analysis Name D:\Data\vipin\14-02-03-SG-249-R.d  
 Method sodium formate tune\_low.m  
 Sample Name SG-249  
 Comment

Acquisition Date 2/3/2014 10:27:55 AM

Operator VIKAS GROVER  
 Instrument / Ser# maXis 40

**Acquisition Parameter**

|             |            |                       |           |                  |           |
|-------------|------------|-----------------------|-----------|------------------|-----------|
| Source Type | ESI        | Ion Polarity          | Positive  | Set Nebulizer    | 1.2 Bar   |
| Focus       | Not active | Set Capillary         | 4500 V    | Set Dry Heater   | 180 °C    |
| Scan Begin  | 50 m/z     | Set End Plate Offset  | -500 V    | Set Dry Gas      | 7.0 l/min |
| Scan End    | 500 m/z    | Set Collision Cell RF | 300.0 Vpp | Set Divert Valve | Source    |

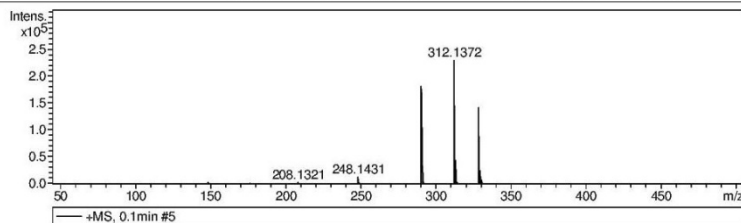

| #  | m/z      | Res.  | S/N    | I      | FWHM   |
|----|----------|-------|--------|--------|--------|
| 1  | 118.1223 | 15981 | 24.2   | 671    | 0.0074 |
| 2  | 125.1071 | 16174 | 12.5   | 396    | 0.0077 |
| 3  | 135.0013 | 13771 | 13.6   | 499    | 0.0098 |
| 4  | 139.0724 | 13394 | 16.3   | 629    | 0.0104 |
| 5  | 148.1113 | 15646 | 71.8   | 3106   | 0.0095 |
| 6  | 149.0228 | 13676 | 21.1   | 922    | 0.0109 |
| 7  | 153.1376 | 16108 | 16.0   | 722    | 0.0095 |
| 8  | 176.1059 | 15393 | 42.2   | 1678   | 0.0114 |
| 9  | 182.5635 | 17117 | 11.0   | 420    | 0.0107 |
| 10 | 186.2205 | 15485 | 16.8   | 634    | 0.0120 |
| 11 | 194.1168 | 14754 | 13.5   | 498    | 0.0132 |
| 12 | 208.1321 | 16419 | 94.2   | 3316   | 0.0127 |
| 13 | 240.0633 | 15079 | 11.9   | 720    | 0.0159 |
| 14 | 248.1431 | 17397 | 204.3  | 12936  | 0.0143 |
| 15 | 249.1456 | 18068 | 29.9   | 1883   | 0.0138 |
| 16 | 250.1433 | 14866 | 13.1   | 819    | 0.0168 |
| 17 | 290.1549 | 14965 | 1912.8 | 181952 | 0.0194 |
| 18 | 291.1576 | 17408 | 345.7  | 33804  | 0.0167 |
| 19 | 292.1600 | 17414 | 23.1   | 2319   | 0.0168 |
| 20 | 312.1372 | 15076 | 1832.8 | 229040 | 0.0207 |
| 21 | 313.1397 | 16912 | 361.6  | 44571  | 0.0185 |
| 22 | 314.1426 | 18047 | 23.0   | 2799   | 0.0174 |
| 23 | 328.1111 | 15544 | 1458.1 | 142725 | 0.0211 |
| 24 | 329.1135 | 18403 | 265.4  | 25531  | 0.0179 |
| 25 | 330.1103 | 16302 | 79.8   | 7538   | 0.0202 |
| 26 | 331.1119 | 15141 | 11.0   | 1023   | 0.0219 |
| 27 | 356.1625 | 15700 | 18.8   | 882    | 0.0227 |
| 28 | 372.1368 | 15836 | 24.9   | 645    | 0.0235 |
| 29 | 413.2668 | 18320 | 20.4   | 461    | 0.0226 |
| 30 | 429.2391 | 20830 | 17.9   | 426    | 0.0206 |

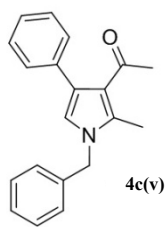

m/z: Calc'd for C<sub>20</sub>H<sub>19</sub>NNaO  
 ([M+Na]<sup>+</sup>): 312.1364, found: 312.1372.

## Mass Spectrum List Report

|                      |                                    |                   |                     |
|----------------------|------------------------------------|-------------------|---------------------|
| <b>Analysis Info</b> |                                    | Acquisition Date  | 4/8/2013 9:23:48 AM |
| Analysis Name        | D:\Data\OUTSIDE\813-04-08-MCR-18.d | Operator          | VIKAS GROVER        |
| Method               | sodium formate tune_low.m          | Instrument / Ser# | maxis 40            |
| Sample Name          | MCR-18                             |                   |                     |
| Comment              |                                    |                   |                     |

|                              |            |                       |           |                  |           |
|------------------------------|------------|-----------------------|-----------|------------------|-----------|
| <b>Acquisition Parameter</b> |            |                       |           |                  |           |
| Source Type                  | ESI        | Ion Polarity          | Positive  | Set Nebulizer    | 1.2 Bar   |
| Focus                        | Not active | Set Capillary         | 4500 V    | Set Dry Heater   | 180 °C    |
| Scan Begin                   | 50 m/z     | Set End Plate Offset  | -500 V    | Set Dry Gas      | 7.0 l/min |
| Scan End                     | 500 m/z    | Set Collision Cell RF | 300.0 Vpp | Set Divert Valve | Source    |

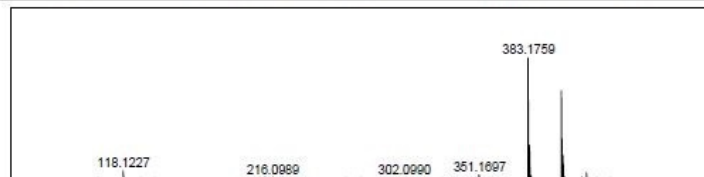

+MS, 0.1min #3

| #  | m/z      | Res.  | S/N     | I       | FWHM   |
|----|----------|-------|---------|---------|--------|
| 1  | 118.1227 | 15604 | 5288.9  | 71074   | 0.0076 |
| 2  | 211.1225 | 20087 | 881.7   | 19104   | 0.0105 |
| 3  | 216.0989 | 20521 | 920.9   | 20571   | 0.0105 |
| 4  | 302.0990 | 20039 | 540.0   | 16955   | 0.0151 |
| 5  | 351.1697 | 20946 | 1078.7  | 37880   | 0.0168 |
| 6  | 383.1759 | 18270 | 11670.5 | 1002342 | 0.0210 |
| 7  | 384.1789 | 18747 | 3154.7  | 280754  | 0.0205 |
| 8  | 385.1811 | 20657 | 360.3   | 33183   | 0.0186 |
| 9  | 405.1580 | 18848 | 6660.8  | 731678  | 0.0215 |
| 10 | 406.1611 | 19324 | 1852.7  | 198390  | 0.0210 |
| 11 | 407.1635 | 21457 | 203.0   | 21175   | 0.0190 |

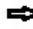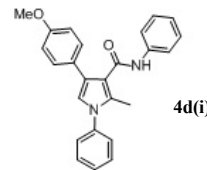

m/z: Calc'd for C<sub>25</sub>H<sub>22</sub>N<sub>2</sub>NaO<sub>2</sub>  
 ([M+Na]<sup>+</sup>): 405.1579, found: 405.1580.



## Mass Spectrum List Report

|                      |                                  |                   |                      |
|----------------------|----------------------------------|-------------------|----------------------|
| <b>Analysis Info</b> |                                  | Acquisition Date  | 4/9/2013 11:38:05 AM |
| Analysis Name        | D:\Data\vipin\813-04-09-MCR-22.d | Operator          | VIKAS GROVER         |
| Method               | sodium formate tune_low.m        | Instrument / Ser# | maXis 40             |
| Sample Name          | MCR-22                           |                   |                      |
| Comment              |                                  |                   |                      |

|                              |            |                       |           |                  |           |
|------------------------------|------------|-----------------------|-----------|------------------|-----------|
| <b>Acquisition Parameter</b> |            |                       |           |                  |           |
| Source Type                  | ESI        | Ion Polarity          | Positive  | Set Nebulizer    | 1.2 Bar   |
| Focus                        | Not active | Set Capillary         | 4500 V    | Set Dry Heater   | 180 °C    |
| Scan Begin                   | 50 m/z     | Set End Plate Offset  | -500 V    | Set Dry Gas      | 7.0 l/min |
| Scan End                     | 500 m/z    | Set Collision Cell RF | 300.0 Vpp | Set Divert Valve | Source    |

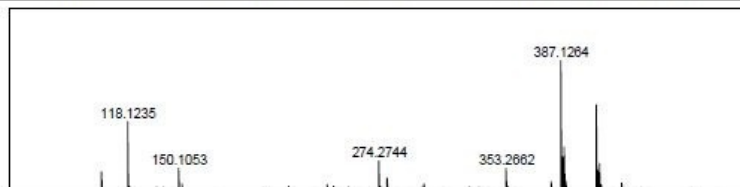

+MS, 0.7min #39

| #  | m/z      | Res.  | S/N     | I      | FWHM   |
|----|----------|-------|---------|--------|--------|
| 1  | 102.1282 | 17142 | 9369.4  | 63428  | 0.0060 |
| 2  | 118.1235 | 14385 | 21275.9 | 237194 | 0.0082 |
| 3  | 150.1053 | 17342 | 4993.5  | 74833  | 0.0087 |
| 4  | 274.2744 | 19155 | 3310.5  | 101382 | 0.0143 |
| 5  | 279.0934 | 20556 | 1313.0  | 39249  | 0.0136 |
| 6  | 302.3053 | 20105 | 837.1   | 20569  | 0.0150 |
| 7  | 353.2662 | 20388 | 2712.7  | 73770  | 0.0173 |
| 8  | 387.1264 | 18418 | 7228.7  | 445223 | 0.0210 |
| 9  | 388.1262 | 19763 | 1795.7  | 113381 | 0.0198 |
| 10 | 389.1240 | 18420 | 2314.2  | 149593 | 0.0211 |
| 11 | 390.1264 | 20648 | 438.1   | 28853  | 0.0189 |
| 12 | 409.1083 | 18953 | 5004.9  | 292952 | 0.0216 |
| 13 | 410.1109 | 20960 | 1228.1  | 69843  | 0.0196 |
| 14 | 411.1058 | 18801 | 1641.5  | 90845  | 0.0219 |
| 15 | 412.1080 | 21358 | 316.9   | 16971  | 0.0193 |
| 16 | 425.0818 | 21475 | 715.7   | 22931  | 0.0198 |
| 17 | 427.0799 | 19029 | 238.8   | 6869   | 0.0224 |

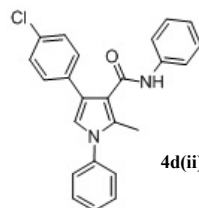

m/z: Calc'd for C<sub>24</sub>H<sub>19</sub>ClN<sub>2</sub>NaO  
 ([M+Na]<sup>+</sup>): 409.1084, Found 409.1083.

## Mass Spectrum List Report

**Analysis Info**

Analysis Name D:\Data\OUTSIDE\813-04-08-MCR-17.d  
 Method sodium formate tune\_low.m  
 Sample Name MCR-17  
 Comment

Acquisition Date 4/8/2013 9:09:44 AM

Operator VIKAS GROVER  
 Instrument / Ser# maXis 40

**Acquisition Parameter**

|             |            |                       |           |                  |           |
|-------------|------------|-----------------------|-----------|------------------|-----------|
| Source Type | ESI        | Ion Polarity          | Positive  | Set Nebulizer    | 1.2 Bar   |
| Focus       | Not active | Set Capillary         | 4500 V    | Set Dry Heater   | 180 °C    |
| Scan Begin  | 50 m/z     | Set End Plate Offset  | -500 V    | Set Dry Gas      | 7.0 l/min |
| Scan End    | 500 m/z    | Set Collision Cell RF | 300.0 Vpp | Set Divert Valve | Source    |

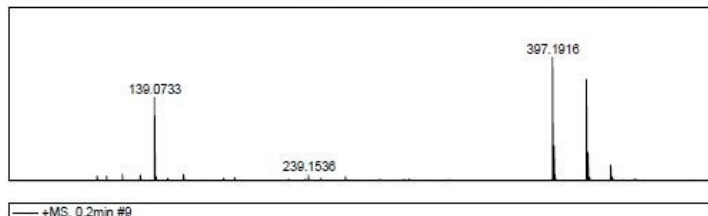

| #  | m/z      | Res.  | S/N     | I      | FWHM   |
|----|----------|-------|---------|--------|--------|
| 1  | 102.1278 | 17825 | 2247.8  | 24568  | 0.0057 |
| 2  | 108.0807 | 15571 | 2095.1  | 27245  | 0.0069 |
| 3  | 118.1226 | 15704 | 2111.3  | 34843  | 0.0075 |
| 4  | 130.1588 | 16955 | 1270.2  | 28342  | 0.0077 |
| 5  | 139.0733 | 16330 | 16101.8 | 436499 | 0.0085 |
| 6  | 158.0962 | 17445 | 1142.9  | 35612  | 0.0091 |
| 7  | 184.1116 | 19705 | 715.4   | 12993  | 0.0093 |
| 8  | 191.1540 | 18052 | 834.4   | 15641  | 0.0100 |
| 9  | 239.1536 | 18953 | 997.6   | 30527  | 0.0126 |
| 10 | 247.2164 | 20697 | 437.3   | 14094  | 0.0119 |
| 11 | 278.1532 | 18657 | 150.1   | 4267   | 0.0149 |
| 12 | 397.1916 | 18637 | 10780.5 | 646903 | 0.0213 |
| 13 | 398.1945 | 19171 | 3032.6  | 184362 | 0.0208 |
| 14 | 399.1972 | 21279 | 352.8   | 21618  | 0.0188 |
| 15 | 419.1737 | 18969 | 7523.0  | 534802 | 0.0221 |
| 16 | 420.1765 | 20072 | 2076.4  | 148628 | 0.0209 |
| 17 | 421.1790 | 21063 | 218.1   | 15719  | 0.0200 |
| 18 | 435.1471 | 20545 | 1306.5  | 84132  | 0.0212 |
| 19 | 436.1498 | 22383 | 307.0   | 19271  | 0.0195 |

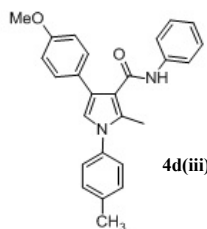

m/z: Calc'd for C<sub>26</sub>H<sub>24</sub>N<sub>2</sub>NaO<sub>2</sub>  
 ([M+Na]<sup>+</sup>): 419.1735, Found 419.1737.

# Mass Spectrum List Report

## Analysis Info

Analysis Name D:\Data\vipin\13-12-20-AT-71.d  
 Method sodium formate tune\_low.m  
 Sample Name AT-71  
 Comment

Acquisition Date 12/20/2013 12:07:51 PM

Operator VIKAS GROVER  
 Instrument / Ser# maXis 40

## Acquisition Parameter

|             |            |                       |           |                  |           |
|-------------|------------|-----------------------|-----------|------------------|-----------|
| Source Type | ESI        | Ion Polarity          | Positive  | Set Nebulizer    | 1.2 Bar   |
| Focus       | Not active | Set Capillary         | 4500 V    | Set Dry Heater   | 180 °C    |
| Scan Begin  | 50 m/z     | Set End Plate Offset  | -500 V    | Set Dry Gas      | 7.0 l/min |
| Scan End    | 500 m/z    | Set Collision Cell RF | 300.0 Vpp | Set Divert Valve | Source    |

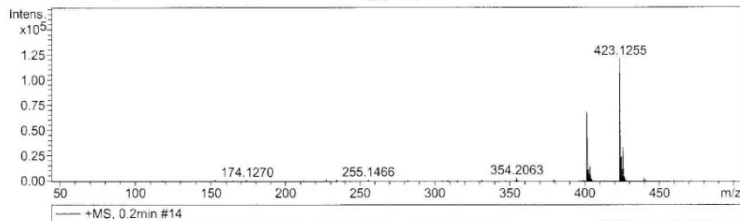

| #  | m/z      | Res.  | S/N   | I      | FWHM   |
|----|----------|-------|-------|--------|--------|
| 1  | 118.1169 | 13225 | 26.1  | 1019   | 0.0089 |
| 2  | 130.1542 | 15164 | 15.1  | 661    | 0.0086 |
| 3  | 153.1354 | 12993 | 32.3  | 1684   | 0.0118 |
| 4  | 164.9187 | 13151 | 14.8  | 782    | 0.0125 |
| 5  | 174.1270 | 14408 | 32.5  | 1726   | 0.0121 |
| 6  | 212.0779 | 14588 | 13.7  | 729    | 0.0145 |
| 7  | 226.9505 | 14092 | 23.3  | 1392   | 0.0161 |
| 8  | 234.0012 | 15398 | 24.5  | 1544   | 0.0152 |
| 9  | 255.1466 | 14413 | 35.3  | 2053   | 0.0177 |
| 10 | 282.1039 | 17042 | 17.5  | 750    | 0.0166 |
| 11 | 305.1571 | 13776 | 18.4  | 907    | 0.0222 |
| 12 | 308.0831 | 15471 | 18.6  | 911    | 0.0199 |
| 13 | 315.1929 | 14682 | 18.7  | 896    | 0.0215 |
| 14 | 331.2164 | 14096 | 30.6  | 1393   | 0.0235 |
| 15 | 347.2486 | 14575 | 18.1  | 978    | 0.0238 |
| 16 | 353.2670 | 15044 | 17.1  | 1009   | 0.0235 |
| 17 | 354.2063 | 15668 | 67.0  | 4009   | 0.0226 |
| 18 | 355.2104 | 14488 | 13.9  | 843    | 0.0245 |
| 19 | 379.1942 | 16310 | 14.8  | 1642   | 0.0232 |
| 20 | 401.1429 | 16219 | 397.2 | 68707  | 0.0247 |
| 21 | 402.1455 | 16956 | 66.7  | 11577  | 0.0237 |
| 22 | 403.1404 | 16175 | 92.2  | 16042  | 0.0249 |
| 23 | 404.1424 | 15427 | 16.4  | 2865   | 0.0262 |
| 24 | 423.1255 | 14848 | 654.5 | 121185 | 0.0285 |
| 25 | 424.1277 | 16844 | 130.4 | 24213  | 0.0252 |
| 26 | 424.1870 | 15623 | 54.8  | 10171  | 0.0272 |
| 27 | 425.1228 | 16552 | 180.5 | 33612  | 0.0257 |
| 28 | 426.1249 | 15526 | 27.1  | 5059   | 0.0274 |
| 29 | 439.0982 | 16383 | 23.5  | 3217   | 0.0268 |
| 30 | 459.1961 | 14780 | 15.0  | 638    | 0.0311 |

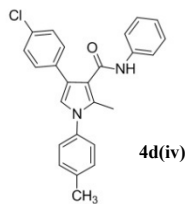

m/z: Calc'd for C<sub>25</sub>H<sub>21</sub>ClN<sub>2</sub>NaO  
 ([M+Na]<sup>+</sup>): 423.1240, Found 423.1255.

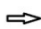

## Mass Spectrum List Report

### Analysis Info

Analysis Name D:\Data\vipin\14-02-04-SG-251.d  
 Method sodium formate tune\_low.m  
 Sample Name SG-251  
 Comment

Acquisition Date 2/4/2014 4:15:43 PM

Operator VIKAS GROVER  
 Instrument / Ser# maXis 40

### Acquisition Parameter

|             |            |                       |           |                  |           |
|-------------|------------|-----------------------|-----------|------------------|-----------|
| Source Type | ES         | Ion Polarity          | Positive  | Set Nebulizer    | 1.2 Bar   |
| Focus       | Not active | Set Capillary         | 4500 V    | Set Dry Heater   | 180 °C    |
| Scan Begin  | 50 m/z     | Set End Plate Offset  | -500 V    | Set Dry Gas      | 7.0 l/min |
| Scan End    | 600 m/z    | Set Collision Cell RF | 300.0 Vpp | Set Divert Valve | Source    |

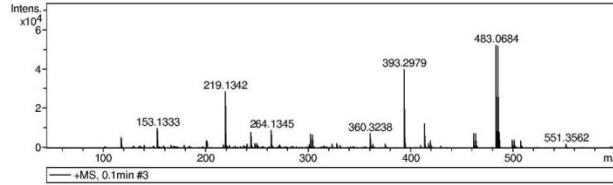

| #  | m/z      | Res.  | SN    | I     | FWHM   |
|----|----------|-------|-------|-------|--------|
| 1  | 118.1131 | 15252 | 84.8  | 5511  | 0.0077 |
| 2  | 153.1333 | 17906 | 125.1 | 9993  | 0.0086 |
| 3  | 201.1223 | 15822 | 33.3  | 3743  | 0.0127 |
| 4  | 219.1342 | 16739 | 214.5 | 28565 | 0.0131 |
| 5  | 244.2627 | 17076 | 57.5  | 7887  | 0.0143 |
| 6  | 248.0062 | 16206 | 16.6  | 2294  | 0.0153 |
| 7  | 250.0043 | 15646 | 15.0  | 2079  | 0.0160 |
| 8  | 264.1345 | 17756 | 68.4  | 9193  | 0.0149 |
| 9  | 302.0536 | 18061 | 63.2  | 7184  | 0.0167 |
| 10 | 304.0524 | 16047 | 58.7  | 6559  | 0.0189 |
| 11 | 328.1300 | 16633 | 25.6  | 2335  | 0.0197 |
| 12 | 360.3238 | 18006 | 81.2  | 7497  | 0.0200 |
| 13 | 383.1642 | 16235 | 23.7  | 2232  | 0.0224 |
| 14 | 375.2505 | 16667 | 17.2  | 2059  | 0.0225 |
| 15 | 393.2979 | 17744 | 253.4 | 39766 | 0.0222 |
| 16 | 394.3006 | 17101 | 33.3  | 5289  | 0.0231 |
| 17 | 413.2661 | 18179 | 98.7  | 12489 | 0.0227 |
| 18 | 417.1235 | 17802 | 21.4  | 2449  | 0.0234 |
| 19 | 419.2769 | 16522 | 35.5  | 3809  | 0.0254 |
| 20 | 461.0857 | 18273 | 75.6  | 7495  | 0.0252 |
| 21 | 463.0838 | 17720 | 71.3  | 7343  | 0.0261 |
| 22 | 463.3029 | 18568 | 52.1  | 5394  | 0.0250 |
| 23 | 483.0684 | 17817 | 467.5 | 52106 | 0.0271 |
| 24 | 484.0708 | 18857 | 80.2  | 8813  | 0.0257 |
| 25 | 485.0669 | 17328 | 477.2 | 51726 | 0.0280 |
| 26 | 486.0691 | 18283 | 75.8  | 8102  | 0.0266 |
| 27 | 499.0412 | 18765 | 47.0  | 4083  | 0.0266 |
| 28 | 501.0399 | 17639 | 48.5  | 4069  | 0.0284 |
| 29 | 507.3295 | 17577 | 51.6  | 3834  | 0.0289 |
| 30 | 551.3562 | 17251 | 69.0  | 2083  | 0.0320 |

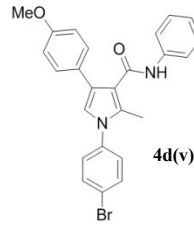

m/z: Calc'd for C<sub>25</sub>H<sub>21</sub>BrN<sub>2</sub>NaO<sub>2</sub>  
 ([M+Na]<sup>+</sup>): 483.0684, Found 483.0684.

## Mass Spectrum List Report

|                      |                                 |                   |                      |
|----------------------|---------------------------------|-------------------|----------------------|
| <b>Analysis Info</b> |                                 | Acquisition Date  | 6/19/2013 2:09:18 PM |
| Analysis Name        | D:\Data\vipin\13-06-19-MCR-33.d | Operator          | VIKAS GROVER         |
| Method               | sodium formate tune_low.m       | Instrument / Ser# | maXis 40             |
| Sample Name          | MCR-33                          |                   |                      |
| Comment              |                                 |                   |                      |

|                              |            |                       |           |                  |           |
|------------------------------|------------|-----------------------|-----------|------------------|-----------|
| <b>Acquisition Parameter</b> |            | Ion Polarity          | Positive  | Set Nebulizer    | 1.2 Bar   |
| Source Type                  | ESI        | Set Capillary         | 4500 V    | Set Dry Heater   | 180 °C    |
| Focus                        | Not active | Set End Plate Offset  | -500 V    | Set Dry Gas      | 7.0 l/min |
| Scan Begin                   | 50 m/z     | Set Collision Cell RF | 300.0 Vpp | Set Divert Valve | Source    |
| Scan End                     | 600 m/z    |                       |           |                  |           |

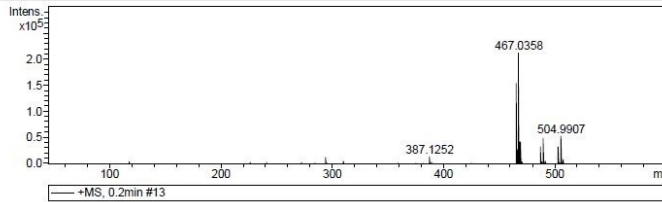

| #  | m/z      | Res.  | S/N    | I      | FWHM   |
|----|----------|-------|--------|--------|--------|
| 1  | 241.7056 | 19156 | 17.9   | 644    | 0.0126 |
| 2  | 258.1489 | 18187 | 13.4   | 588    | 0.0142 |
| 3  | 272.1640 | 19370 | 47.2   | 2715   | 0.0141 |
| 4  | 284.3310 | 18890 | 14.8   | 1029   | 0.0151 |
| 5  | 311.1233 | 16050 | 10.5   | 600    | 0.0194 |
| 6  | 354.2837 | 19117 | 18.4   | 825    | 0.0185 |
| 7  | 359.2395 | 19787 | 53.2   | 2359   | 0.0182 |
| 8  | 375.2134 | 20194 | 21.5   | 1110   | 0.0186 |
| 9  | 381.1951 | 19199 | 27.1   | 1495   | 0.0199 |
| 10 | 387.1252 | 21709 | 246.0  | 14430  | 0.0178 |
| 11 | 388.1281 | 19188 | 32.2   | 1908   | 0.0202 |
| 12 | 389.1229 | 18339 | 41.3   | 2469   | 0.0212 |
| 13 | 409.1070 | 17414 | 17.4   | 992    | 0.0235 |
| 14 | 425.0811 | 19098 | 41.3   | 1716   | 0.0223 |
| 15 | 427.0791 | 16679 | 14.0   | 556    | 0.0256 |
| 16 | 465.0377 | 16785 | 994.1  | 154016 | 0.0277 |
| 17 | 466.0394 | 20744 | 173.9  | 27720  | 0.0225 |
| 18 | 467.0358 | 16776 | 1300.6 | 213059 | 0.0278 |
| 19 | 468.0374 | 20573 | 252.0  | 42411  | 0.0227 |
| 20 | 469.0329 | 19699 | 242.7  | 41907  | 0.0238 |
| 21 | 470.0346 | 20671 | 25.3   | 4490   | 0.0227 |
| 22 | 487.0184 | 20675 | 192.5  | 32341  | 0.0236 |
| 23 | 488.0205 | 21850 | 22.9   | 3801   | 0.0223 |
| 24 | 489.0167 | 19981 | 299.5  | 49000  | 0.0245 |
| 25 | 490.0190 | 20265 | 32.8   | 5289   | 0.0242 |
| 26 | 491.0139 | 19770 | 34.2   | 5452   | 0.0248 |
| 27 | 502.9624 | 21547 | 249.2  | 33122  | 0.0233 |
| 28 | 504.9907 | 19678 | 414.9  | 53331  | 0.0257 |
| 29 | 505.9932 | 20439 | 47.8   | 6033   | 0.0248 |
| 30 | 506.9883 | 21005 | 66.7   | 8277   | 0.0241 |

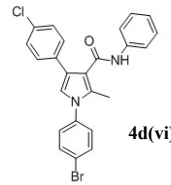

m/z: Calc'd for C<sub>20</sub>H<sub>15</sub>BrClN<sub>2</sub>NaO  
 ([M+Na]<sup>+</sup>): 487.0189, Found 487.0184.

## Mass Spectrum List Report

### Analysis Info

Analysis Name: D:\Data\vipin\SG-292\_1-B\_1\_01\_1667.d  
 Method: HIGH FLOW DIRECT INJECTION LOW MASS.m  
 Sample Name: SG-292  
 Comment:

Acquisition Date: 11/7/2014 4:13:40 PM  
 Operator: VIKAS GROVER  
 Instrument / Ser#: maXis 40

### Acquisition Parameter

|             |            |                       |           |                  |           |
|-------------|------------|-----------------------|-----------|------------------|-----------|
| Source Type | ESI        | Ion Polarity          | Positive  | Set Nebulizer    | 1.2 Bar   |
| Focus       | Not active | Set Capillary         | 4500 V    | Set Dry Heater   | 200 °C    |
| Scan Begin  | 50 m/z     | Set End Plate Offset  | -500 V    | Set Dry Gas      | 7.0 l/min |
| Scan End    | 600 m/z    | Set Collision Cell RF | 300.0 Vpp | Set Divert Valve | Waste     |

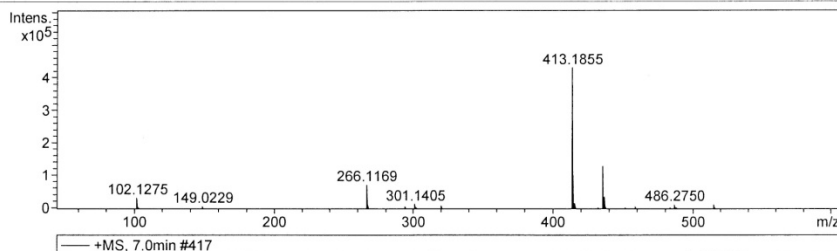

| #  | m/z      | Res.  | S/N     | I      | FWHM   |
|----|----------|-------|---------|--------|--------|
| 1  | 102.1275 | 12843 | 1135.6  | 33350  | 0.0080 |
| 2  | 103.1307 | 12440 | 88.2    | 2619   | 0.0083 |
| 3  | 149.0229 | 14563 | 169.5   | 6442   | 0.0102 |
| 4  | 205.0850 | 16457 | 49.1    | 1664   | 0.0125 |
| 5  | 253.0854 | 17503 | 17.4    | 1763   | 0.0145 |
| 6  | 266.1169 | 17671 | 748.8   | 72527  | 0.0151 |
| 7  | 267.1203 | 17186 | 132.8   | 12823  | 0.0155 |
| 8  | 288.2893 | 17197 | 22.8    | 2041   | 0.0168 |
| 9  | 294.1481 | 18233 | 56.7    | 4835   | 0.0161 |
| 10 | 301.1405 | 18448 | 171.1   | 13763  | 0.0163 |
| 11 | 302.1435 | 16986 | 27.3    | 2175   | 0.0178 |
| 12 | 320.1278 | 18201 | 115.9   | 7786   | 0.0176 |
| 13 | 321.1309 | 19007 | 25.6    | 1702   | 0.0169 |
| 14 | 413.1855 | 18716 | 19693.1 | 428665 | 0.0221 |
| 15 | 414.1889 | 18916 | 5390.6  | 116870 | 0.0219 |
| 16 | 415.1914 | 18537 | 803.0   | 17347  | 0.0224 |
| 17 | 416.1931 | 18179 | 98.2    | 2122   | 0.0229 |
| 18 | 432.1596 | 19861 | 109.8   | 2214   | 0.0218 |
| 19 | 435.1676 | 19179 | 6555.9  | 130002 | 0.0227 |
| 20 | 436.1710 | 19763 | 1846.8  | 36464  | 0.0221 |
| 21 | 437.1739 | 18649 | 269.4   | 5357   | 0.0234 |
| 22 | 451.1422 | 19010 | 62.1    | 3614   | 0.0237 |
| 23 | 457.1499 | 19576 | 21.8    | 1625   | 0.0234 |
| 24 | 458.2440 | 20473 | 76.1    | 5904   | 0.0224 |
| 25 | 459.2468 | 19865 | 22.3    | 1794   | 0.0231 |
| 26 | 483.1529 | 19572 | 28.7    | 3317   | 0.0247 |
| 27 | 486.2750 | 19022 | 105.4   | 11939  | 0.0256 |
| 28 | 487.2785 | 19373 | 38.0    | 4280   | 0.0252 |
| 29 | 514.3067 | 19938 | 117.1   | 10690  | 0.0258 |
| 30 | 515.3097 | 19738 | 44.4    | 3991   | 0.0261 |

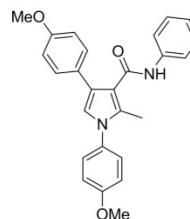

**4d(vii)**

m/z: Calc'd for C<sub>26</sub>H<sub>25</sub>N<sub>2</sub>O<sub>3</sub>  
 ([M+H]<sup>+</sup>): 413.1865, found: 413.1855

# Mass Spectrum List Report

## Analysis Info

Analysis Name D:\Data\OUTSIDE\13-04-08-MCR-16.d  
 Method sodium formate tune\_low.m  
 Sample Name MCR-16  
 Comment

Acquisition Date 4/8/2013 8:54:24 AM

Operator VIKAS GROVER  
 Instrument / Ser# maXis 40

## Acquisition Parameter

|             |            |                       |           |                  |           |
|-------------|------------|-----------------------|-----------|------------------|-----------|
| Source Type | ESI        | Ion Polarity          | Positive  | Set Nebulizer    | 1.2 Bar   |
| Focus       | Not active | Set Capillary         | 4500 V    | Set Dry Heater   | 180 °C    |
| Scan Begin  | 50 m/z     | Set End Plate Offset  | -500 V    | Set Dry Gas      | 7.0 l/min |
| Scan End    | 500 m/z    | Set Collision Cell RF | 300.0 Vpp | Set Divert Valve | Source    |

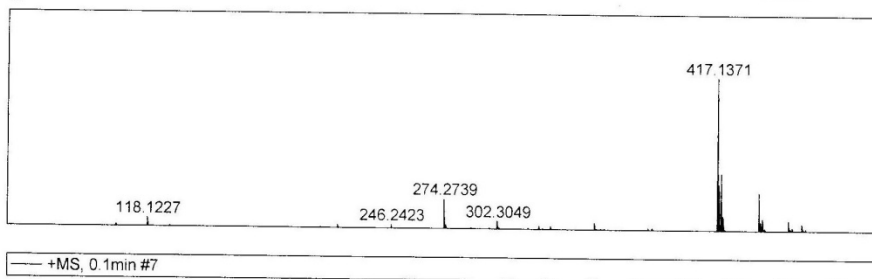

| # | m/z      | Res.  | S/N     | I       | FWHM   |
|---|----------|-------|---------|---------|--------|
| 1 | 118.1227 | 16429 | 399.1   | 66158   | 0.0072 |
| 2 | 218.2109 | 18852 | 1316.8  | 25268   | 0.0116 |
| 3 | 246.2423 | 20227 | 1243.6  | 31115   | 0.0122 |
| 4 | 274.2739 | 17969 | 5199.0  | 225759  | 0.0153 |
| 5 | 302.3049 | 20321 | 1764.0  | 59936   | 0.0149 |
| 6 | 417.1371 | 17499 | 10701.7 | 1156687 | 0.0238 |
| 7 | 439.1188 | 19144 | 2528.4  | 287725  | 0.0229 |
| 8 | 455.0922 | 21025 | 1378.3  | 75685   | 0.0216 |
| 9 | 462.1942 | 22107 | 1290.3  | 49957   | 0.0209 |

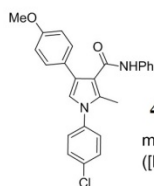

**4d(viii)**

m/z: Calc'd for C<sub>25</sub>H<sub>21</sub>ClN<sub>2</sub>NaO<sub>2</sub>  
 ([M+Na]<sup>+</sup>): 439.1189, found: 439.1188

## Mass Spectrum List Report

### Analysis Info

Analysis Name D:\Data\vipin\13-04-05-MCR-11.d  
 Method sodium formate tune\_low.m  
 Sample Name MCR-11  
 Comment

Acquisition Date 4/5/2013 12:33:30 PM

Operator VIKAS GROVER  
 Instrument / Ser# maXis 40

### Acquisition Parameter

|             |            |                       |           |                  |           |
|-------------|------------|-----------------------|-----------|------------------|-----------|
| Source Type | ESI        | Ion Polarity          | Positive  | Set Nebulizer    | 1.2 Bar   |
| Focus       | Not active | Set Capillary         | 4500 V    | Set Dry Heater   | 180 °C    |
| Scan Begin  | 50 m/z     | Set End Plate Offset  | -500 V    | Set Dry Gas      | 7.0 l/min |
| Scan End    | 500 m/z    | Set Collision Cell RF | 300.0 Vpp | Set Divert Valve | Source    |

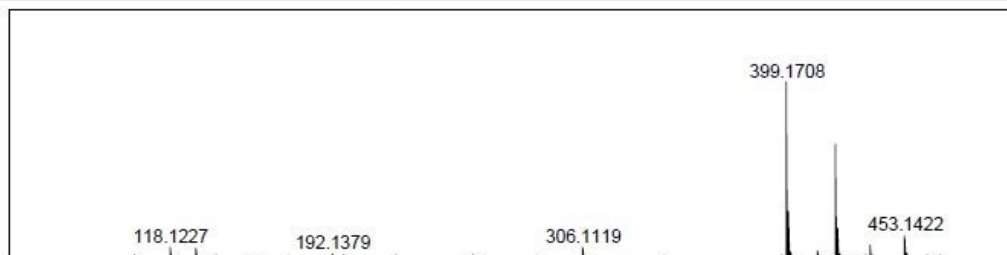

| # | m/z      | Res.  | S/N     | I      | FWHM   |
|---|----------|-------|---------|--------|--------|
| 1 | 118.1227 | 15851 | 3022.8  | 38824  | 0.0075 |
| 2 | 130.1590 | 17833 | 2268.8  | 32929  | 0.0073 |
| 3 | 192.1379 | 19145 | 747.4   | 12440  | 0.0100 |
| 4 | 197.1070 | 18807 | 512.7   | 8550   | 0.0105 |
| 5 | 306.1119 | 20556 | 1428.9  | 40973  | 0.0149 |
| 6 | 399.1708 | 19099 | 10890.8 | 665063 | 0.0209 |
| 7 | 421.1529 | 19419 | 4727.7  | 428305 | 0.0217 |
| 8 | 437.1284 | 16011 | 508.2   | 43344  | 0.0273 |
| 9 | 453.1422 | 20773 | 1417.6  | 82836  | 0.0218 |

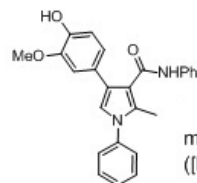

**4d (ix)**

m/z: Calc'd for C<sub>25</sub>H<sub>22</sub>N<sub>2</sub>NaO<sub>3</sub>  
 ((M+Na)<sup>+</sup>): 421.1528, found: 421.1529



## Mass Spectrum List Report

### Analysis Info

Analysis Name D:\Data\vipin\813-04-08-MCR-20.d  
 Method sodium formate tune\_low.m  
 Sample Name MCR-20  
 Comment

Acquisition Date 4/8/2013 9:54:09 AM

Operator VIKAS GROVER  
 Instrument / Ser# maXis 40

### Acquisition Parameter

|             |            |                       |           |                  |           |
|-------------|------------|-----------------------|-----------|------------------|-----------|
| Source Type | ESI        | Ion Polarity          | Positive  | Set Nebulizer    | 1.2 Bar   |
| Focus       | Not active | Set Capillary         | 4500 V    | Set Dry Heater   | 180 °C    |
| Scan Begin  | 50 m/z     | Set End Plate Offset  | -500 V    | Set Dry Gas      | 7.0 l/min |
| Scan End    | 500 m/z    | Set Collision Cell RF | 300.0 Vpp | Set Divert Valve | Source    |

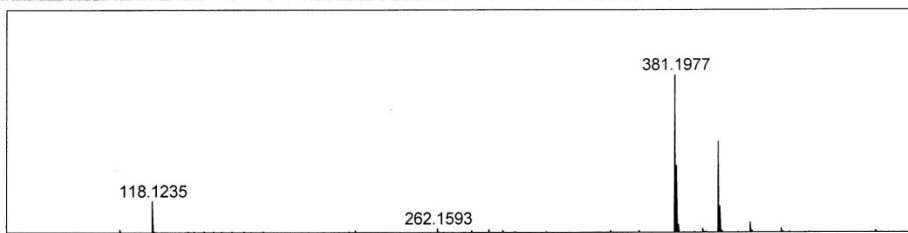

— +MS, 0.3min #18

| #  | m/z      | Res.  | S/N     | I       | FWHM   |
|----|----------|-------|---------|---------|--------|
| 1  | 118.1235 | 16069 | 13918.6 | 245605  | 0.0074 |
| 2  | 262.1593 | 20538 | 944.1   | 31017   | 0.0128 |
| 3  | 381.1977 | 14276 | 14624.0 | 1236302 | 0.0267 |
| 4  | 382.1998 | 18392 | 6149.7  | 524645  | 0.0208 |
| 5  | 383.2021 | 19927 | 794.1   | 68364   | 0.0192 |
| 6  | 403.1787 | 18801 | 7917.7  | 709288  | 0.0214 |
| 7  | 404.1815 | 18956 | 2327.4  | 205294  | 0.0213 |
| 8  | 405.1840 | 20651 | 247.0   | 21444   | 0.0196 |
| 9  | 419.1535 | 18574 | 1232.1  | 83384   | 0.0226 |
| 10 | 435.1665 | 21156 | 687.6   | 33450   | 0.0206 |

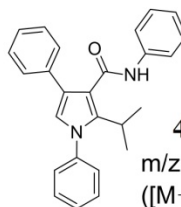

**4d(x)**

m/z: Calc'd for  $C_{26}H_{24}N_2NaO$   
 ( $[M+Na]^+$ ): 403.1786, found: 403.1787

## Mass Spectrum List Report

**Analysis Info**

|               |                                       |                   |                       |
|---------------|---------------------------------------|-------------------|-----------------------|
| Analysis Name | D:\Data\vipin\SG-287_1-A_4_01_1557.d  | Acquisition Date  | 10/21/2014 4:43:02 PM |
| Method        | HIGH FLOW DIRECT INJECTION LOW MASS.m | Operator          | VIKAS GROVER          |
| Sample Name   | SG-287                                | Instrument / Ser# | maXis 40              |
| Comment       |                                       |                   |                       |

**Acquisition Parameter**

|             |            |                       |           |                  |           |
|-------------|------------|-----------------------|-----------|------------------|-----------|
| Source Type | ESI        | Ion Polarity          | Positive  | Set Nebulizer    | 1.2 Bar   |
| Focus       | Not active | Set Capillary         | 4500 V    | Set Dry Heater   | 200 °C    |
| Scan Begin  | 50 m/z     | Set End Plate Offset  | -500 V    | Set Dry Gas      | 7.0 l/min |
| Scan End    | 600 m/z    | Set Collision Cell RF | 300.0 Vpp | Set Divert Valve | Waste     |

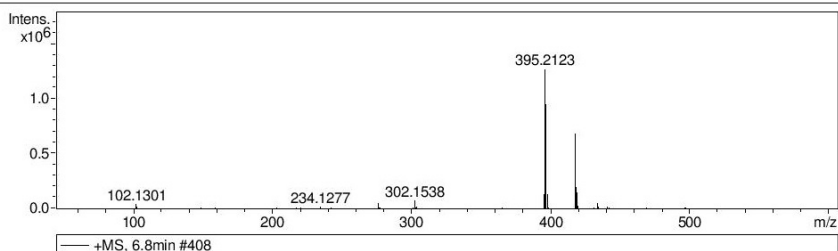

| #  | m/z      | Res.  | S/N     | I       | FWHM   |
|----|----------|-------|---------|---------|--------|
| 1  | 102.1301 | 13252 | 1161.3  | 39177   | 0.0077 |
| 2  | 149.0242 | 15001 | 190.2   | 11146   | 0.0099 |
| 3  | 158.9648 | 15451 | 223.4   | 13181   | 0.0103 |
| 4  | 203.0529 | 16413 | 327.1   | 8160    | 0.0124 |
| 5  | 217.0688 | 15721 | 832.6   | 10491   | 0.0138 |
| 6  | 220.1330 | 17028 | 556.1   | 7168    | 0.0129 |
| 7  | 234.1277 | 17050 | 1286.7  | 18262   | 0.0137 |
| 8  | 242.1150 | 17221 | 714.7   | 10683   | 0.0141 |
| 9  | 276.1747 | 18013 | 2307.9  | 52466   | 0.0153 |
| 10 | 277.1777 | 16947 | 480.9   | 11080   | 0.0164 |
| 11 | 301.1411 | 17807 | 487.4   | 11934   | 0.0169 |
| 12 | 302.1538 | 17865 | 3055.4  | 74333   | 0.0169 |
| 13 | 303.1571 | 18251 | 687.4   | 16672   | 0.0166 |
| 14 | 365.1055 | 19102 | 221.3   | 7960    | 0.0191 |
| 15 | 395.2123 | 11573 | 11079.7 | 1265975 | 0.0342 |
| 16 | 395.4160 | 12171 | 76.3    | 8809    | 0.0325 |
| 17 | 395.4963 | 18589 | 110.6   | 12779   | 0.0213 |
| 18 | 395.6704 | 23017 | 282.3   | 32652   | 0.0172 |
| 19 | 396.2153 | 18648 | 8070.3  | 943244  | 0.0212 |
| 20 | 397.2185 | 19790 | 1109.3  | 132606  | 0.0201 |
| 21 | 398.2211 | 19275 | 100.6   | 12337   | 0.0207 |
| 22 | 417.1938 | 18680 | 8403.0  | 676795  | 0.0223 |
| 23 | 418.1971 | 19345 | 2515.6  | 196056  | 0.0216 |
| 24 | 419.2005 | 19674 | 369.5   | 27859   | 0.0213 |
| 25 | 430.9137 | 19488 | 205.7   | 9228    | 0.0221 |
| 26 | 433.1682 | 19418 | 1316.9  | 51230   | 0.0223 |
| 27 | 434.1712 | 18551 | 402.2   | 14604   | 0.0234 |
| 28 | 440.2700 | 20009 | 704.4   | 19248   | 0.0220 |
| 29 | 468.3011 | 20029 | 420.5   | 6321    | 0.0234 |
| 30 | 496.3324 | 19070 | 834.9   | 10782   | 0.0260 |

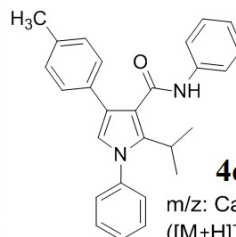

**4d(xi)**

m/z: Calc'd for C<sub>27</sub>H<sub>27</sub>N<sub>2</sub>O  
 ([M+H]<sup>+</sup>): 395.2123, found: 395.2123

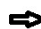

## Mass Spectrum List Report

**Analysis Info**

|               |                                       |                   |                       |
|---------------|---------------------------------------|-------------------|-----------------------|
| Analysis Name | D:\Data\vipin\SG-291_1-A.5_01_1558.d  | Acquisition Date  | 10/21/2014 4:59:27 PM |
| Method        | HIGH FLOW DIRECT INJECTION LOW MASS.m | Operator          | VIKAS GROVER          |
| Sample Name   | SG-291                                | Instrument / Ser# | maXis 40              |
| Comment       |                                       |                   |                       |

**Acquisition Parameter**

|             |            |                       |           |                  |           |
|-------------|------------|-----------------------|-----------|------------------|-----------|
| Source Type | ESI        | Ion Polarity          | Positive  | Set Nebulizer    | 1.2 Bar   |
| Focus       | Not active | Set Capillary         | 4500 V    | Set Dry Heater   | 200 °C    |
| Scan Begin  | 50 m/z     | Set End Plate Offset  | -500 V    | Set Dry Gas      | 7.0 l/min |
| Scan End    | 600 m/z    | Set Collision Cell RF | 300.0 Vpp | Set Divert Valve | Waste     |

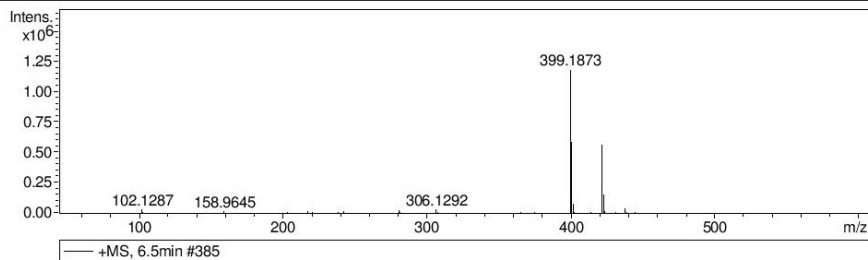

| #  | m/z      | Res.  | S/N     | I       | FWHM   |
|----|----------|-------|---------|---------|--------|
| 1  | 102.1287 | 13335 | 910.7   | 30647   | 0.0077 |
| 2  | 158.9645 | 15601 | 549.6   | 17548   | 0.0102 |
| 3  | 203.0530 | 16256 | 601.2   | 9194    | 0.0125 |
| 4  | 217.0688 | 16218 | 910.9   | 14906   | 0.0134 |
| 5  | 220.1335 | 16799 | 714.0   | 11795   | 0.0131 |
| 6  | 238.1029 | 17161 | 573.0   | 9987    | 0.0139 |
| 7  | 242.1154 | 16951 | 1054.7  | 18590   | 0.0143 |
| 8  | 280.1500 | 17621 | 1060.3  | 27588   | 0.0159 |
| 9  | 281.1544 | 17083 | 222.2   | 5855    | 0.0165 |
| 10 | 306.1292 | 18034 | 1117.1  | 30124   | 0.0170 |
| 11 | 307.1334 | 18081 | 255.5   | 6892    | 0.0170 |
| 12 | 362.9267 | 18243 | 158.9   | 5485    | 0.0199 |
| 13 | 365.1061 | 18760 | 248.8   | 9331    | 0.0195 |
| 14 | 374.1606 | 19300 | 113.1   | 5720    | 0.0194 |
| 15 | 399.1873 | 13553 | 13832.5 | 1184440 | 0.0295 |
| 16 | 399.4724 | 14066 | 59.8    | 5191    | 0.0284 |
| 17 | 399.6472 | 26105 | 175.6   | 15197   | 0.0153 |
| 18 | 400.1905 | 18986 | 6784.1  | 585418  | 0.0211 |
| 19 | 401.1935 | 19864 | 897.2   | 77239   | 0.0202 |
| 20 | 402.1963 | 19201 | 87.0    | 7511    | 0.0209 |
| 21 | 413.2668 | 18403 | 83.1    | 6936    | 0.0225 |
| 22 | 421.1690 | 19047 | 6950.3  | 563318  | 0.0221 |
| 23 | 422.1723 | 19369 | 1917.1  | 154924  | 0.0218 |
| 24 | 423.1757 | 19070 | 256.8   | 20711   | 0.0222 |
| 25 | 424.0762 | 18737 | 65.7    | 5310    | 0.0226 |
| 26 | 426.0742 | 19792 | 69.4    | 5571    | 0.0215 |
| 27 | 430.9141 | 19370 | 162.6   | 12804   | 0.0222 |
| 28 | 437.1434 | 19083 | 561.6   | 43244   | 0.0229 |
| 29 | 438.1465 | 19234 | 158.7   | 11980   | 0.0228 |
| 30 | 444.2451 | 18510 | 180.7   | 11902   | 0.0240 |

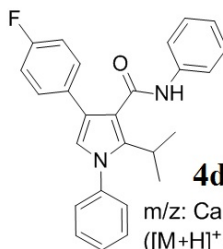

**4d(xii)**

m/z: Calc'd for C<sub>26</sub>H<sub>24</sub>FN<sub>2</sub>O  
 ([M+H]<sup>+</sup>): 399.1873, found: 399.1873

## Mass Spectrum List Report

|                      |                                  |                   |                     |
|----------------------|----------------------------------|-------------------|---------------------|
| <b>Analysis Info</b> |                                  | Acquisition Date  | 4/8/2013 9:41:08 AM |
| Analysis Name        | D:\Data\vipin\813-04-08-MCR-19.d | Operator          | VIKAS GROVER        |
| Method               | sodium formate tune_low.m        | Instrument / Ser# | maXis 40            |
| Sample Name          | MCR-19                           |                   |                     |
| Comment              |                                  |                   |                     |

|                              |            |                       |           |                  |           |
|------------------------------|------------|-----------------------|-----------|------------------|-----------|
| <b>Acquisition Parameter</b> |            |                       |           |                  |           |
| Source Type                  | EI         | Ion Polarity          | Positive  | Set Nebulizer    | 1.2 Bar   |
| Focus                        | Not active | Set Capillary         | 4500 V    | Set Dry Heater   | 150 °C    |
| Scan Begin                   | 50 m/z     | Set End Plate Offset  | -500 V    | Set Dry Gas      | 7.0 l/min |
| Scan End                     | 500 m/z    | Set Collision Cell RF | 300.0 Vpp | Set Divert Valve | Source    |

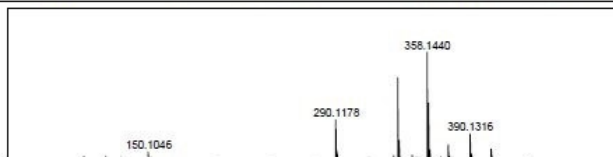

| #  | m/z      | Res.  | S/N    | I       | FWHM   |
|----|----------|-------|--------|---------|--------|
| 1  | 150.1046 | 18137 | 201.2  | 83488   | 0.0083 |
| 2  | 152.1014 | 17598 | 47.7   | 20238   | 0.0066 |
| 3  | 187.0362 | 18095 | 15.1   | 1953    | 0.0103 |
| 4  | 199.0573 | 19865 | 44.4   | 6222    | 0.0100 |
| 5  | 219.0622 | 20191 | 13.7   | 2165    | 0.0108 |
| 6  | 221.1645 | 19629 | 34.2   | 5470    | 0.0113 |
| 7  | 236.1070 | 17660 | 11.1   | 1930    | 0.0132 |
| 8  | 241.0471 | 19360 | 13.0   | 2328    | 0.0125 |
| 9  | 244.0943 | 20926 | 21.7   | 3943    | 0.0117 |
| 10 | 245.0789 | 19800 | 39.0   | 7356    | 0.0124 |
| 11 | 253.0834 | 18837 | 12.4   | 3165    | 0.0134 |
| 12 | 259.0936 | 18618 | 17.0   | 5225    | 0.0139 |
| 13 | 275.0918 | 19454 | 14.5   | 6394    | 0.0141 |
| 14 | 285.1551 | 21725 | 11.7   | 4910    | 0.0131 |
| 15 | 290.1178 | 18229 | 1142.0 | 4704.14 | 0.0159 |
| 16 | 291.1205 | 18989 | 205.1  | 84074   | 0.0153 |
| 17 | 292.1224 | 20211 | 17.4   | 7108    | 0.0145 |
| 18 | 306.1317 | 20434 | 10.8   | 4254    | 0.0150 |
| 19 | 315.0831 | 21685 | 22.5   | 13341   | 0.0145 |
| 20 | 333.0940 | 21358 | 35.4   | 34770   | 0.0156 |
| 21 | 336.1599 | 18463 | 919.7  | 965941  | 0.0182 |
| 22 | 337.1628 | 18935 | 200.6  | 220890  | 0.0178 |
| 23 | 338.1649 | 19476 | 19.2   | 22157   | 0.0174 |
| 24 | 347.1097 | 21641 | 24.3   | 39916   | 0.0160 |
| 25 | 358.1440 | 11321 | 568.3  | 1275000 | 0.0316 |
| 26 | 359.1450 | 18318 | 290.2  | 666792  | 0.0196 |
| 27 | 360.1462 | 19145 | 45.9   | 107953  | 0.0188 |
| 28 | 374.1158 | 18897 | 73.5   | 168936  | 0.0195 |
| 29 | 390.1316 | 19092 | 218.8  | 293596  | 0.0204 |
| 30 | 405.1254 | 20390 | 154.5  | 112760  | 0.0199 |

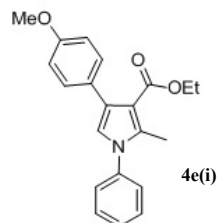

m/z: Calc'd for C<sub>21</sub>H<sub>21</sub>NNaO<sub>3</sub>  
 ([M+Na]<sup>+</sup>): 358.1419, Found 358.1440.

## Mass Spectrum List Report

|                      |                                  |                   |                      |
|----------------------|----------------------------------|-------------------|----------------------|
| <b>Analysis Info</b> |                                  | Acquisition Date  | 1/27/2014 2:08:12 PM |
| Analysis Name        | D:\Data\vipin\14-01-27-AT-73-B.d | Operator          | VIKAS GROVER         |
| Method               | sodium formate tune_low.m        | Instrument / Ser# | maXis 40             |
| Sample Name          | AT-73-B                          |                   |                      |
| Comment              |                                  |                   |                      |

|                              |            |                       |           |                  |           |
|------------------------------|------------|-----------------------|-----------|------------------|-----------|
| <b>Acquisition Parameter</b> |            |                       |           |                  |           |
| Source Type                  | ESI        | Ion Polarity          | Positive  | Set Nebulizer    | 1.2 Bar   |
| Focus                        | Not active | Set Capillary         | 4500 V    | Set Dry Heater   | 180 °C    |
| Scan Begin                   | 50 m/z     | Set End Plate Offset  | -500 V    | Set Dry Gas      | 7.0 l/min |
| Scan End                     | 500 m/z    | Set Collision Cell RF | 300.0 Vpp | Set Divert Valve | Source    |

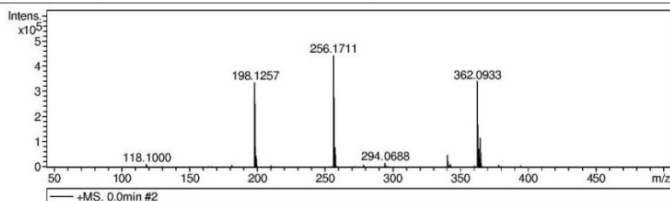

| #  | m/z      | Res.  | S/N    | I      | FWHM   |
|----|----------|-------|--------|--------|--------|
| 1  | 118.1000 | 15102 | 127.4  | 11479  | 0.0078 |
| 2  | 130.1413 | 16260 | 23.4   | 2181   | 0.0080 |
| 3  | 139.0581 | 19575 | 19.6   | 1795   | 0.0071 |
| 4  | 164.0992 | 15288 | 24.1   | 2667   | 0.0107 |
| 5  | 166.1148 | 16132 | 22.3   | 2546   | 0.0103 |
| 6  | 176.1013 | 14810 | 11.3   | 1492   | 0.0119 |
| 7  | 181.0957 | 17551 | 67.4   | 9487   | 0.0103 |
| 8  | 198.1257 | 13669 | 1843.0 | 335549 | 0.0145 |
| 9  | 199.1285 | 16036 | 252.2  | 46546  | 0.0124 |
| 10 | 210.1260 | 17371 | 35.0   | 7427   | 0.0121 |
| 11 | 255.1467 | 16374 | 13.2   | 2200   | 0.0156 |
| 12 | 256.1711 | 14263 | 2693.8 | 440878 | 0.0180 |
| 13 | 257.1738 | 15816 | 495.9  | 79896  | 0.0163 |
| 14 | 258.1763 | 17374 | 24.6   | 3893   | 0.0149 |
| 15 | 272.1647 | 17138 | 21.8   | 2678   | 0.0159 |
| 16 | 278.1520 | 18009 | 75.7   | 9023   | 0.0154 |
| 17 | 294.0688 | 17767 | 138.4  | 18772  | 0.0166 |
| 18 | 295.0714 | 18115 | 16.4   | 2235   | 0.0163 |
| 19 | 296.0662 | 16966 | 31.9   | 4389   | 0.0175 |
| 20 | 340.1105 | 17051 | 223.1  | 48662  | 0.0199 |
| 21 | 341.1135 | 17792 | 26.6   | 6058   | 0.0192 |
| 22 | 342.1078 | 17124 | 46.9   | 11147  | 0.0200 |
| 23 | 342.2061 | 18131 | 19.0   | 4538   | 0.0189 |
| 24 | 360.1954 | 19083 | 13.8   | 5689   | 0.0189 |
| 25 | 362.0933 | 14459 | 794.8  | 338226 | 0.0250 |
| 26 | 363.0959 | 16672 | 165.0  | 72732  | 0.0218 |
| 27 | 364.0906 | 15259 | 257.8  | 116082 | 0.0239 |
| 28 | 365.0927 | 18054 | 35.8   | 16469  | 0.0202 |
| 29 | 378.0655 | 19141 | 30.0   | 10191  | 0.0198 |
| 30 | 394.0819 | 17612 | 42.1   | 5849   | 0.0224 |

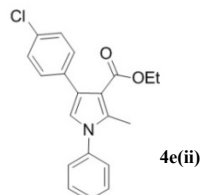

m/z: Calc'd for C<sub>20</sub>H<sub>18</sub>ClNNaO<sub>2</sub>  
 ([M+Na]<sup>+</sup>): 362.0924, Found 362.0933.

## Mass Spectrum List Report

### Analysis Info

Analysis Name D:\Data\vipin\13-04-05-MCR-12.d  
Method sodium formate tune\_low.m  
Sample Name MCR-12  
Comment

Acquisition Date 4/5/2013 1:38:13 PM

Operator VIKAS GROVER  
Instrument / Ser# maXis 40

### Acquisition Parameter

|             |            |                       |           |                  |           |
|-------------|------------|-----------------------|-----------|------------------|-----------|
| Source Type | ESI        | Ion Polarity          | Positive  | Set Nebulizer    | 1.2 Bar   |
| Focus       | Not active | Set Capillary         | 4500 V    | Set Dry Heater   | 180 °C    |
| Scan Begin  | 50 m/z     | Set End Plate Offset  | -500 V    | Set Dry Gas      | 7.0 l/min |
| Scan End    | 500 m/z    | Set Collision Cell RF | 300.0 Vpp | Set Divert Valve | Source    |

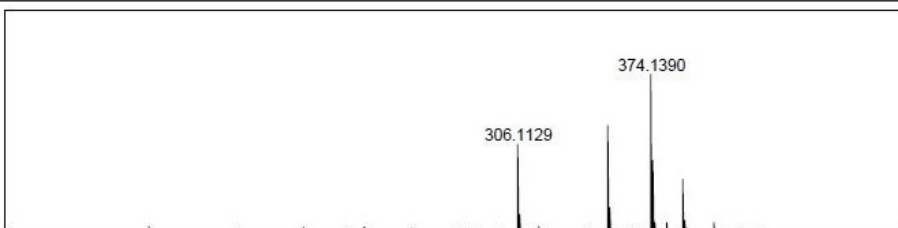

| # | m/z      | Res.  | S/N    | I       | FWHM   |
|---|----------|-------|--------|---------|--------|
| 1 | 306.1129 | 17945 | 9952.3 | 707320  | 0.0171 |
| 2 | 352.1549 | 17749 | 6278.7 | 864647  | 0.0198 |
| 3 | 353.1580 | 18440 | 1379.6 | 199244  | 0.0192 |
| 4 | 354.1598 | 20371 | 148.0  | 22367   | 0.0174 |
| 5 | 374.1390 | 12107 | 6412.7 | 1274054 | 0.0309 |
| 6 | 375.1403 | 18163 | 2980.2 | 576385  | 0.0207 |
| 7 | 376.1427 | 19759 | 393.2  | 73971   | 0.0190 |
| 8 | 390.1112 | 18526 | 3718.4 | 426160  | 0.0211 |

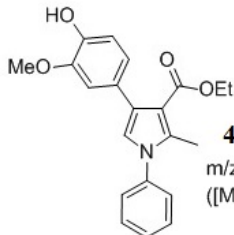

**4e(iii)**

m/z: Calc'd for  $C_{21}H_{21}NNaO_4$   
([M+Na]<sup>+</sup>): 374.1368, found: 374.1390

## Mass Spectrum List Report

### Analysis Info

Analysis Name D:\Data\vipin\SG-243\_1-A,6\_01\_1630.d  
 Method HIGH FLOW DIRECT INJECTION LOW MASS.m  
 Sample Name SG-243  
 Comment

Acquisition Date 10/31/2014 10:44:15 AM

Operator VIKAS GROVER  
 Instrument / Ser# maXis 40

### Acquisition Parameter

|             |            |                       |           |                  |           |
|-------------|------------|-----------------------|-----------|------------------|-----------|
| Source Type | ESI        | Ion Polarity          | Positive  | Set Nebulizer    | 1.2 Bar   |
| Focus       | Not active | Set Capillary         | 4500 V    | Set Dry Heater   | 200 °C    |
| Scan Begin  | 50 m/z     | Set End Plate Offset  | -500 V    | Set Dry Gas      | 7.0 l/min |
| Scan End    | 600 m/z    | Set Collision Cell RF | 300.0 Vpp | Set Divert Valve | Waste     |

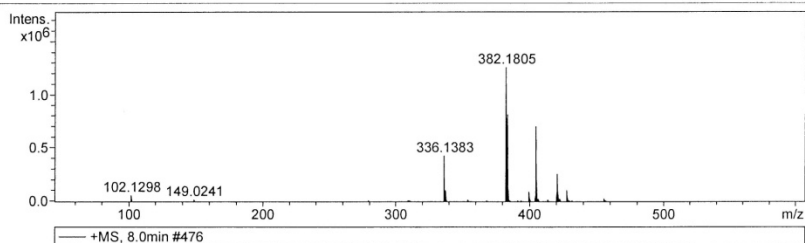

| #  | m/z      | Res.  | S/N     | I       | FWHM   |
|----|----------|-------|---------|---------|--------|
| 1  | 102.1298 | 12786 | 2189.4  | 61587   | 0.0080 |
| 2  | 149.0241 | 14923 | 397.8   | 19834   | 0.0100 |
| 3  | 309.1510 | 18447 | 221.6   | 8302    | 0.0168 |
| 4  | 336.1383 | 18111 | 10126.1 | 430491  | 0.0186 |
| 5  | 337.1416 | 17994 | 2566.0  | 107990  | 0.0187 |
| 6  | 338.1450 | 18343 | 324.5   | 13565   | 0.0184 |
| 7  | 354.1489 | 18048 | 448.3   | 15542   | 0.0196 |
| 8  | 368.1648 | 18454 | 162.0   | 9419    | 0.0200 |
| 9  | 382.1805 | 11867 | 10218.8 | 1256423 | 0.0322 |
| 10 | 382.3805 | 11625 | 61.6    | 7692    | 0.0329 |
| 11 | 382.4598 | 15623 | 71.7    | 8973    | 0.0245 |
| 12 | 382.6307 | 23909 | 220.4   | 27622   | 0.0160 |
| 13 | 383.1835 | 17973 | 6390.7  | 815599  | 0.0213 |
| 14 | 384.1869 | 18418 | 900.8   | 119222  | 0.0209 |
| 15 | 385.1900 | 19158 | 86.8    | 11951   | 0.0201 |
| 16 | 391.2844 | 19244 | 79.1    | 13132   | 0.0203 |
| 17 | 399.2068 | 19537 | 447.8   | 90578   | 0.0204 |
| 18 | 400.2102 | 18541 | 121.1   | 24601   | 0.0216 |
| 19 | 404.1620 | 18476 | 3761.0  | 704256  | 0.0219 |
| 20 | 405.1655 | 19392 | 1084.7  | 198876  | 0.0209 |
| 21 | 406.1687 | 19581 | 151.3   | 27175   | 0.0207 |
| 22 | 413.2661 | 19178 | 113.6   | 17250   | 0.0215 |
| 23 | 420.1361 | 19101 | 2074.4  | 258525  | 0.0220 |
| 24 | 421.1395 | 19612 | 598.5   | 72250   | 0.0215 |
| 25 | 422.1373 | 17238 | 210.6   | 24625   | 0.0245 |
| 26 | 427.2381 | 18874 | 1058.9  | 102494  | 0.0226 |
| 27 | 428.2413 | 19454 | 332.6   | 30900   | 0.0220 |
| 28 | 431.1970 | 18661 | 80.8    | 6585    | 0.0231 |
| 29 | 455.2694 | 18735 | 612.8   | 23039   | 0.0243 |
| 30 | 456.2727 | 18802 | 214.9   | 7841    | 0.0243 |

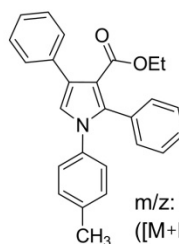

**4e(iv)**

m/z: Calc'd for C<sub>26</sub>H<sub>24</sub>NO<sub>2</sub>  
 ([M+H]<sup>+</sup>): 382.1807, found: 382.1805

# Mass Spectrum List Report

## Analysis Info

Analysis Name D:\Data\vipin\13-08-27-MCR-38.d  
 Method sodium formate tune\_low.m  
 Sample Name MCR-38  
 Comment

Acquisition Date 8/29/2013 11:08:16 AM

Operator VIKAS GROVER  
 Instrument / Ser# maXis 40

## Acquisition Parameter

|             |            |                       |           |                  |           |
|-------------|------------|-----------------------|-----------|------------------|-----------|
| Source Type | ESI        | Ion Polarity          | Positive  | Set Nebulizer    | 1.2 Bar   |
| Focus       | Not active | Set Capillary         | 4500 V    | Set Dry Heater   | 180 °C    |
| Scan Begin  | 50 m/z     | Set End Plate Offset  | -500 V    | Set Dry Gas      | 7.0 l/min |
| Scan End    | 500 m/z    | Set Collision Cell RF | 300.0 Vpp | Set Divert Valve | Source    |

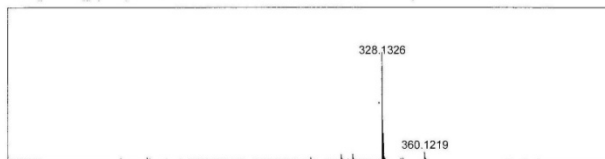

— +MS, 0.3min #15

| #  | m/z      | Res.  | S/N    | I      | FWHM   |
|----|----------|-------|--------|--------|--------|
| 1  | 226.9512 | 17337 | 52.8   | 4326   | 0.0131 |
| 2  | 230.2483 | 17729 | 49.2   | 4074   | 0.0130 |
| 3  | 236.1046 | 17495 | 12.7   | 1059   | 0.0135 |
| 4  | 246.2427 | 18023 | 38.4   | 3520   | 0.0137 |
| 5  | 258.2793 | 20339 | 11.6   | 1415   | 0.0127 |
| 6  | 264.1381 | 17738 | 19.1   | 2609   | 0.0149 |
| 7  | 268.0945 | 17874 | 18.3   | 2696   | 0.0150 |
| 8  | 272.2599 | 19028 | 12.9   | 2029   | 0.0143 |
| 9  | 273.0736 | 18460 | 15.4   | 2458   | 0.0148 |
| 10 | 274.2744 | 18556 | 167.1  | 27153  | 0.0148 |
| 11 | 275.2776 | 18207 | 24.1   | 3981   | 0.0151 |
| 12 | 278.0792 | 17189 | 18.2   | 3155   | 0.0162 |
| 13 | 297.1580 | 18234 | 232.3  | 53776  | 0.0163 |
| 14 | 298.1610 | 18783 | 31.8   | 7446   | 0.0159 |
| 15 | 302.3059 | 17891 | 24.0   | 5920   | 0.0169 |
| 16 | 306.1495 | 18655 | 216.2  | 56574  | 0.0164 |
| 17 | 307.1525 | 18841 | 36.6   | 9885   | 0.0163 |
| 18 | 328.1326 | 14821 | 2068.0 | 926672 | 0.0221 |
| 19 | 329.1355 | 17139 | 524.2  | 239369 | 0.0192 |
| 20 | 330.1377 | 18711 | 45.2   | 21027  | 0.0176 |
| 21 | 342.1110 | 19301 | 22.7   | 10607  | 0.0177 |
| 22 | 344.1252 | 18295 | 38.4   | 17947  | 0.0188 |
| 23 | 350.1219 | 18035 | 208.7  | 76724  | 0.0200 |
| 24 | 361.1248 | 19108 | 38.7   | 13260  | 0.0189 |
| 25 | 376.1160 | 18514 | 15.4   | 3858   | 0.0203 |
| 26 | 396.1191 | 18444 | 14.7   | 1294   | 0.0215 |
| 27 | 437.1945 | 20228 | 54.6   | 4404   | 0.0216 |
| 28 | 438.1978 | 18417 | 12.9   | 1026   | 0.0238 |
| 29 | 440.1651 | 20016 | 23.3   | 1787   | 0.0220 |
| 30 | 465.1436 | 19654 | 33.5   | 1686   | 0.0237 |

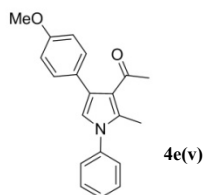

m/z: Calc'd for C<sub>20</sub>H<sub>19</sub>NNaO<sub>2</sub>  
 ([M+Na]<sup>+</sup>): 328.1313, Found 328.1326.



## Mass Spectrum List Report

**Analysis Info**

Analysis Name D:\Data\vipin\14-02-03-SG-250.d  
 Method sodium formate tune\_low.m  
 Sample Name SG-250  
 Comment

Acquisition Date 2/3/2014 10:36:58 AM

Operator VIKAS GROVER  
 Instrument / Ser# maXis 40

**Acquisition Parameter**

|             |            |                       |           |                  |           |
|-------------|------------|-----------------------|-----------|------------------|-----------|
| Source Type | ESI        | Ion Polarity          | Positive  | Set Nebulizer    | 1.2 Bar   |
| Focus       | Not active | Set Capillary         | 4500 V    | Set Dry Heater   | 180 °C    |
| Scan Begin  | 50 m/z     | Set End Plate Offset  | -500 V    | Set Dry Gas      | 7.0 l/min |
| Scan End    | 500 m/z    | Set Collision Cell RF | 300.0 Vpp | Set Divert Valve | Source    |

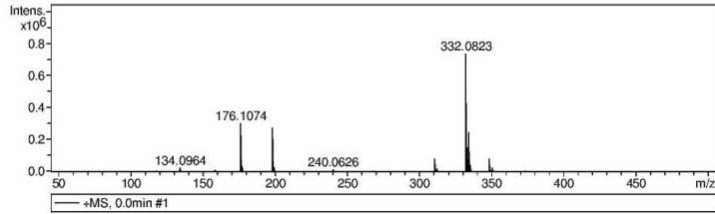

| #  | m/z      | Res.  | S/N    | I      | FWHM   |
|----|----------|-------|--------|--------|--------|
| 1  | 118.0651 | 16092 | 30.9   | 3886   | 0.0073 |
| 2  | 134.0964 | 16657 | 205.5  | 25380  | 0.0081 |
| 3  | 135.0029 | 15974 | 19.1   | 2335   | 0.0085 |
| 4  | 135.0989 | 14002 | 10.7   | 1304   | 0.0096 |
| 5  | 139.0729 | 14632 | 28.2   | 3304   | 0.0095 |
| 6  | 158.0961 | 16572 | 97.9   | 11571  | 0.0095 |
| 7  | 176.1074 | 13689 | 1765.8 | 303089 | 0.0129 |
| 8  | 177.1100 | 16225 | 196.3  | 34273  | 0.0109 |
| 9  | 198.0893 | 13278 | 1500.3 | 276723 | 0.0143 |
| 10 | 199.0920 | 16439 | 152.5  | 28046  | 0.0121 |
| 11 | 205.0678 | 18945 | 15.0   | 2711   | 0.0108 |
| 12 | 240.0626 | 17379 | 105.4  | 13880  | 0.0138 |
| 13 | 268.0880 | 17825 | 40.1   | 3840   | 0.0150 |
| 14 | 270.0847 | 14175 | 10.5   | 977    | 0.0191 |
| 15 | 301.1402 | 15252 | 15.8   | 3128   | 0.0197 |
| 16 | 310.0996 | 16497 | 323.3  | 83352  | 0.0188 |
| 17 | 311.1021 | 18346 | 41.4   | 11052  | 0.0170 |
| 18 | 312.0964 | 17797 | 74.2   | 20471  | 0.0175 |
| 19 | 332.0823 | 14993 | 1609.2 | 737854 | 0.0221 |
| 20 | 333.0853 | 14801 | 318.1  | 148779 | 0.0225 |
| 21 | 334.0799 | 14593 | 512.9  | 244538 | 0.0229 |
| 22 | 335.0822 | 16896 | 89.6   | 43522  | 0.0198 |
| 23 | 348.0559 | 16466 | 235.1  | 79996  | 0.0211 |
| 24 | 349.0579 | 19270 | 34.6   | 11325  | 0.0181 |
| 25 | 350.0531 | 17849 | 85.2   | 26736  | 0.0196 |
| 26 | 351.0562 | 17600 | 10.8   | 3235   | 0.0199 |
| 27 | 373.1877 | 16504 | 52.0   | 4296   | 0.0226 |
| 28 | 374.1919 | 17136 | 11.5   | 942    | 0.0218 |
| 29 | 393.2970 | 20214 | 16.9   | 1082   | 0.0195 |
| 30 | 413.2666 | 17395 | 42.2   | 2581   | 0.0238 |

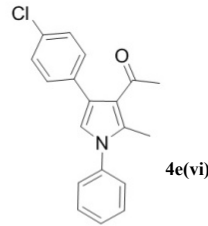

m/z: Calc'd for C<sub>19</sub>H<sub>16</sub>ClNNaO  
 ([M+Na]<sup>+</sup>): 332.0818, Found 332.0823.

# Mass Spectrum List Report

## Analysis Info

Analysis Name D:\Data\vipin\13-04-05-MCR-13.d  
 Method sodium formate tune\_low.m  
 Sample Name MCR-13  
 Comment

Acquisition Date 4/5/2013 1:51:38 PM

Operator VIKAS GROVER  
 Instrument / Ser# maXis 40

## Acquisition Parameter

|             |            |                       |           |                  |           |
|-------------|------------|-----------------------|-----------|------------------|-----------|
| Source Type | ESI        | Ion Polarity          | Positive  | Set Nebulizer    | 1.2 Bar   |
| Focus       | Not active | Set Capillary         | 4500 V    | Set Dry Heater   | 180 °C    |
| Scan Begin  | 50 m/z     | Set End Plate Offset  | -500 V    | Set Dry Gas      | 7.0 l/min |
| Scan End    | 500 m/z    | Set Collision Cell RF | 300.0 Vpp | Set Divert Valve | Source    |

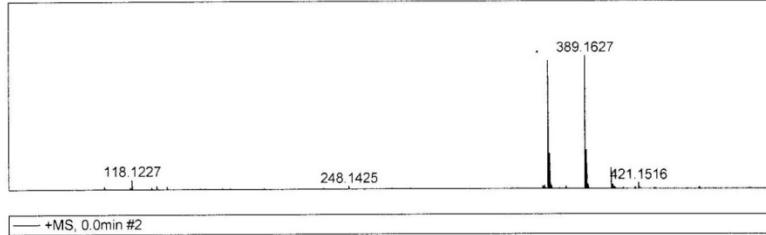

| #  | m/z      | Res.  | S/N    | I      | FWHM   |
|----|----------|-------|--------|--------|--------|
| 1  | 102.1278 | 15940 | 1447.6 | 19223  | 0.0064 |
| 2  | 118.1227 | 16217 | 3195.1 | 70355  | 0.0073 |
| 3  | 133.1334 | 17159 | 945.7  | 22979  | 0.0078 |
| 4  | 139.0726 | 16579 | 805.7  | 19728  | 0.0084 |
| 5  | 162.1270 | 19563 | 260.0  | 6597   | 0.0083 |
| 6  | 177.1376 | 20222 | 174.8  | 4560   | 0.0088 |
| 7  | 197.1067 | 19044 | 244.7  | 6709   | 0.0103 |
| 8  | 248.1425 | 19311 | 486.9  | 21149  | 0.0128 |
| 9  | 274.1224 | 20106 | 217.3  | 9187   | 0.0136 |
| 10 | 285.1559 | 20679 | 245.8  | 9925   | 0.0138 |
| 11 | 346.1042 | 21294 | 146.5  | 9714   | 0.0163 |
| 12 | 367.1807 | 18150 | 7555.2 | 906637 | 0.0202 |
| 13 | 368.1838 | 18711 | 2080.1 | 249679 | 0.0197 |
| 14 | 369.1867 | 19758 | 220.9  | 26520  | 0.0187 |
| 15 | 389.1627 | 17672 | 7764.0 | 937673 | 0.0220 |
| 16 | 421.1516 | 20995 | 596.0  | 41165  | 0.0201 |

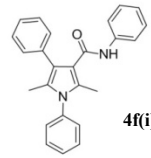

m/z: Calc'd for C<sub>25</sub>H<sub>22</sub>N<sub>2</sub>NaO  
 ([M+Na]<sup>+</sup>): 389.1630, Found 389.1627.

## Mass Spectrum List Report

**Analysis Info**

Analysis Name D:\Data\wipin\13-04-05-MCR-15.d  
 Method sodium formate tune\_low.m  
 Sample Name MCR-15  
 Comment

Acquisition Date 4/5/2013 2:16:55 PM

Operator VIKAS GROVER  
 Instrument / Ser# maXis 40

**Acquisition Parameter**

|             |            |                       |           |                  |           |
|-------------|------------|-----------------------|-----------|------------------|-----------|
| Source Type | ESI        | Ion Polarity          | Positive  | Set Nebulizer    | 1.2 Bar   |
| Focus       | Not active | Set Capillary         | 4500 V    | Set Dry Heater   | 180 °C    |
| Scan Begin  | 50 m/z     | Set End Plate Offset  | -500 V    | Set Dry Gas      | 7.0 l/min |
| Scan End    | 500 m/z    | Set Collision Cell RF | 300.0 Vpp | Set Divert Valve | Source    |

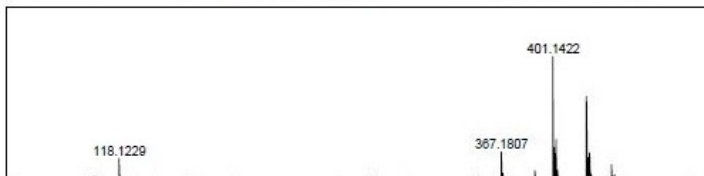

+MS, 0.1min #7

| #  | m/z      | Res.  | S/N    | I      | FWHM   |
|----|----------|-------|--------|--------|--------|
| 1  | 118.1229 | 16274 | 8210.9 | 120130 | 0.0073 |
| 2  | 367.1807 | 18950 | 5199.4 | 157888 | 0.0194 |
| 3  | 389.1623 | 20494 | 818.1  | 50377  | 0.0190 |
| 4  | 401.1422 | 18619 | 9336.3 | 893135 | 0.0215 |
| 5  | 402.1451 | 18963 | 2474.2 | 184159 | 0.0212 |
| 6  | 403.1401 | 17486 | 3063.1 | 227833 | 0.0231 |
| 7  | 404.1422 | 20459 | 727.1  | 54394  | 0.0198 |
| 8  | 423.1242 | 18498 | 5984.1 | 467893 | 0.0229 |
| 9  | 424.1270 | 19465 | 1563.5 | 122983 | 0.0218 |
| 10 | 425.1220 | 18240 | 1908.8 | 150483 | 0.0233 |
| 11 | 426.1239 | 20128 | 407.0  | 32167  | 0.0212 |
| 12 | 439.0978 | 19978 | 1448.9 | 84422  | 0.0220 |
| 13 | 446.1991 | 21904 | 132.1  | 5883   | 0.0204 |

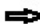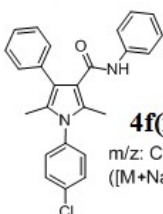

**4f(ii)**

m/z: Calc'd for C<sub>25</sub>H<sub>21</sub>ClN<sub>2</sub>NaO  
 ([M+Na]<sup>+</sup>): 423.1240, found: 423.1242

## Mass Spectrum List Report

**Analysis Info**

Analysis Name D:\Data\vipin\14-01-13-SG-239.d  
 Method sodium formate tune\_low.m  
 Sample Name SG-239  
 Comment

Acquisition Date 1/13/2014 3:12:45 PM

Operator VIKAS GROVER  
 Instrument / Ser# maXis 40

**Acquisition Parameter**

|             |            |                       |           |                  |           |
|-------------|------------|-----------------------|-----------|------------------|-----------|
| Source Type | ESI        | Ion Polarity          | Positive  | Set Nebulizer    | 1.2 Bar   |
| Focus       | Not active | Set Capillary         | 4500 V    | Set Dry Heater   | 180 °C    |
| Scan Begin  | 50 m/z     | Set End Plate Offset  | -500 V    | Set Dry Gas      | 7.0 l/min |
| Scan End    | 600 m/z    | Set Collision Cell RF | 300.0 Vpp | Set Divert Valve | Source    |

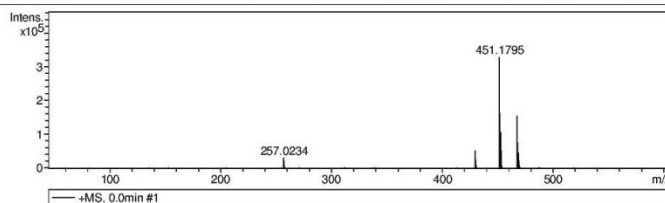

| #  | m/z      | Res.  | S/N    | I      | FWHM   |
|----|----------|-------|--------|--------|--------|
| 1  | 102.1267 | 16291 | 13.9   | 602    | 0.0063 |
| 2  | 116.1429 | 16875 | 10.9   | 635    | 0.0069 |
| 3  | 135.0022 | 17088 | 33.3   | 2625   | 0.0079 |
| 4  | 150.9762 | 18444 | 10.4   | 792    | 0.0082 |
| 5  | 153.1381 | 16353 | 45.2   | 3401   | 0.0094 |
| 6  | 164.9196 | 16678 | 19.7   | 1373   | 0.0099 |
| 7  | 205.0673 | 16841 | 39.7   | 3566   | 0.0122 |
| 8  | 255.1458 | 18125 | 16.9   | 2992   | 0.0141 |
| 9  | 257.0234 | 17768 | 183.4  | 31637  | 0.0145 |
| 10 | 258.0267 | 16841 | 15.3   | 2603   | 0.0153 |
| 11 | 270.9764 | 17850 | 12.0   | 1643   | 0.0152 |
| 12 | 312.0747 | 19423 | 29.3   | 2910   | 0.0161 |
| 13 | 314.0703 | 21219 | 12.4   | 1231   | 0.0148 |
| 14 | 338.1483 | 19628 | 21.5   | 2021   | 0.0172 |
| 15 | 340.1649 | 18531 | 18.2   | 1688   | 0.0184 |
| 16 | 375.1454 | 19787 | 17.1   | 1311   | 0.0190 |
| 17 | 413.2655 | 17855 | 14.3   | 2107   | 0.0231 |
| 18 | 429.1965 | 17917 | 224.6  | 53506  | 0.0240 |
| 19 | 430.1992 | 18512 | 49.6   | 12094  | 0.0232 |
| 20 | 451.1795 | 15585 | 1177.3 | 327835 | 0.0289 |
| 21 | 452.1822 | 15990 | 385.7  | 107269 | 0.0283 |
| 22 | 453.1846 | 18703 | 42.5   | 11813  | 0.0242 |
| 23 | 467.1534 | 15731 | 567.1  | 155005 | 0.0297 |
| 24 | 468.1557 | 17943 | 174.1  | 47533  | 0.0261 |
| 25 | 469.1544 | 16382 | 40.9   | 11154  | 0.0286 |
| 26 | 487.2484 | 19636 | 10.9   | 2213   | 0.0248 |
| 27 | 518.2276 | 21205 | 33.7   | 2343   | 0.0244 |

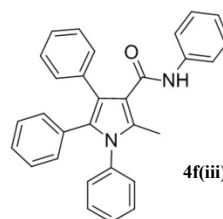

m/z: Calc'd for C<sub>30</sub>H<sub>24</sub>N<sub>2</sub>NaO  
 ([M+Na]<sup>+</sup>): 451.1786, Found 451.1795.

## Mass Spectrum List Report

**Analysis Info**

Analysis Name D:\Data\vipin\SG-240\_1-A,6\_01\_1559.d  
 Method HIGH FLOW DIRECT INJECTION LOW MASS.m  
 Sample Name SG-240  
 Comment

Acquisition Date 10/21/2014 5:15:52 PM

Operator VIKAS GROVER  
 Instrument / Ser# maXis 40

**Acquisition Parameter**

|             |            |                       |           |                  |           |
|-------------|------------|-----------------------|-----------|------------------|-----------|
| Source Type | ESI        | Ion Polarity          | Positive  | Set Nebulizer    | 1.2 Bar   |
| Focus       | Not active | Set Capillary         | 4500 V    | Set Dry Heater   | 200 °C    |
| Scan Begin  | 50 m/z     | Set End Plate Offset  | -500 V    | Set Dry Gas      | 7.0 l/min |
| Scan End    | 600 m/z    | Set Collision Cell RF | 300.0 Vpp | Set Divert Valve | Waste     |

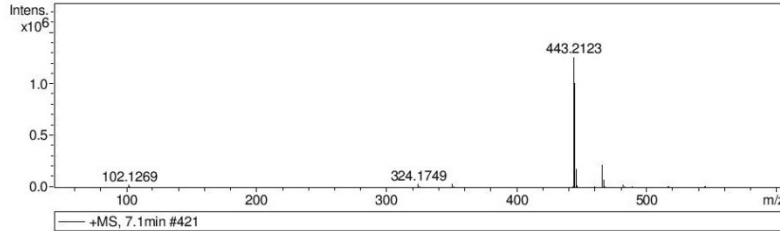

| #    | m/z      | Res.  | S/N     | I       | FWHM   |
|------|----------|-------|---------|---------|--------|
| 1    | 102.1269 | 13269 | 1068.7  | 29234   | 0.0077 |
| 2    | 158.9638 | 15804 | 135.4   | 5123    | 0.0101 |
| 3    | 217.0687 | 16381 | 100.9   | 4573    | 0.0133 |
| 4    | 324.1749 | 18425 | 2546.1  | 37734   | 0.0176 |
| 5    | 325.1781 | 18631 | 648.2   | 9683    | 0.0175 |
| 6    | 350.1542 | 18088 | 1868.2  | 31826   | 0.0194 |
| 7    | 351.1576 | 19008 | 510.9   | 8762    | 0.0185 |
| 8    | 387.1856 | 19506 | 206.0   | 4163    | 0.0198 |
| 9    | 441.1964 | 19008 | 52.6    | 4727    | 0.0232 |
| → 10 | 443.2123 | 11812 | 14610.8 | 1259540 | 0.0375 |
| 11   | 443.4279 | 12644 | 101.7   | 8785    | 0.0351 |
| 12   | 443.5127 | 17973 | 137.0   | 11798   | 0.0247 |
| 13   | 443.6976 | 23734 | 365.6   | 31315   | 0.0187 |
| 14   | 444.2150 | 18516 | 11838.4 | 1003968 | 0.0240 |
| 15   | 445.2178 | 19869 | 2115.2  | 176458  | 0.0224 |
| 16   | 446.2212 | 19819 | 225.6   | 18540   | 0.0225 |
| 17   | 459.2069 | 19256 | 96.9    | 6219    | 0.0238 |
| 18   | 465.1938 | 19608 | 3902.9  | 216636  | 0.0237 |
| 19   | 466.1971 | 20145 | 1314.3  | 71123   | 0.0231 |
| 20   | 467.2001 | 19813 | 224.3   | 11841   | 0.0236 |
| 21   | 475.2021 | 18918 | 113.9   | 4792    | 0.0251 |
| 22   | 481.1683 | 18893 | 659.3   | 24407   | 0.0255 |
| 23   | 482.1716 | 19457 | 235.8   | 8539    | 0.0248 |
| 24   | 483.1703 | 17944 | 107.5   | 3806    | 0.0269 |
| 25   | 488.2698 | 19120 | 319.3   | 9938    | 0.0255 |
| 26   | 501.2648 | 19187 | 207.1   | 4209    | 0.0261 |
| 27   | 516.3006 | 20386 | 309.3   | 7318    | 0.0253 |
| 28   | 521.2235 | 20482 | 111.7   | 4102    | 0.0254 |
| 29   | 544.3323 | 19942 | 140.2   | 13723   | 0.0273 |
| 30   | 545.3356 | 20261 | 57.3    | 5764    | 0.0269 |

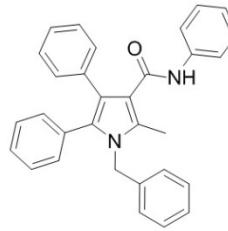

**4f(iv)**

m/z: Calc'd for C<sub>31</sub>H<sub>27</sub>N<sub>2</sub>O  
 ([M+H]<sup>+</sup>): 443.2123, found: 443.2123

## Mass Spectrum List Report

|                      |                                |                   |                      |
|----------------------|--------------------------------|-------------------|----------------------|
| <b>Analysis Info</b> |                                | Acquisition Date  | 1/21/2013 2:14:57 PM |
| Analysis Name        | D:\Data\vipin\13-01-21-MCR-6.d | Operator          | VIKAS GROVER         |
| Method               | sodium formate tune_low.m      | Instrument / Ser# | maXis 40             |
| Sample Name          | MCR-6                          |                   |                      |
| Comment              |                                |                   |                      |

|                              |            |                       |           |                  |           |
|------------------------------|------------|-----------------------|-----------|------------------|-----------|
| <b>Acquisition Parameter</b> |            |                       |           |                  |           |
| Source Type                  | ESI        | Ion Polarity          | Positive  | Set Nebulizer    | 1.2 Bar   |
| Focus                        | Not active | Set Capillary         | 4500 V    | Set Dry Heater   | 180 °C    |
| Scan Begin                   | 50 m/z     | Set End Plate Offset  | -500 V    | Set Dry Gas      | 7.0 l/min |
| Scan End                     | 500 m/z    | Set Collision Cell RF | 300.0 Vpp | Set Divert Valve | Source    |

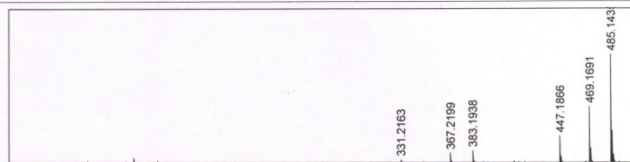

— +MS, 0.7min #40

| #  | m/z      | Res.  | S/N    | I      | FWHM   |
|----|----------|-------|--------|--------|--------|
| 1  | 281.5948 | 19485 | 10.9   | 326    | 0.0145 |
| 2  | 331.2163 | 23457 | 130.2  | 4805   | 0.0141 |
| 3  | 332.2194 | 22910 | 25.0   | 978    | 0.0145 |
| 4  | 347.2474 | 23549 | 28.1   | 1221   | 0.0147 |
| 5  | 353.1641 | 24125 | 10.4   | 468    | 0.0146 |
| 6  | 367.2199 | 24992 | 318.3  | 15606  | 0.0147 |
| 7  | 368.2226 | 23425 | 45.8   | 2257   | 0.0157 |
| 8  | 375.1459 | 23202 | 16.6   | 839    | 0.0162 |
| 9  | 383.1938 | 23406 | 378.6  | 19750  | 0.0164 |
| 10 | 384.1964 | 23939 | 51.0   | 2670   | 0.0160 |
| 11 | 385.1940 | 18938 | 21.1   | 1110   | 0.0203 |
| 12 | 391.1199 | 22745 | 35.8   | 1925   | 0.0172 |
| 13 | 401.2560 | 22326 | 12.9   | 695    | 0.0180 |
| 14 | 413.2651 | 22950 | 45.6   | 2278   | 0.0180 |
| 15 | 414.2692 | 24718 | 12.0   | 597    | 0.0168 |
| 16 | 417.2295 | 23421 | 22.1   | 1074   | 0.0178 |
| 17 | 421.1303 | 23739 | 19.3   | 916    | 0.0177 |
| 18 | 429.2391 | 24960 | 16.7   | 792    | 0.0172 |
| 19 | 436.1266 | 21930 | 10.4   | 743    | 0.0200 |
| 20 | 447.1866 | 22819 | 441.8  | 42634  | 0.0196 |
| 21 | 448.1895 | 24661 | 107.9  | 10712  | 0.0182 |
| 22 | 449.1924 | 22882 | 12.1   | 1231   | 0.0196 |
| 23 | 466.1602 | 24564 | 13.4   | 1837   | 0.0190 |
| 24 | 469.1691 | 22356 | 635.9  | 89581  | 0.0210 |
| 25 | 470.1719 | 24926 | 169.6  | 24090  | 0.0189 |
| 26 | 471.1747 | 23475 | 17.1   | 2446   | 0.0201 |
| 27 | 485.1435 | 21052 | 1089.3 | 173871 | 0.0230 |
| 28 | 485.1492 | 23100 | 325.6  | 52353  | 0.0210 |
| 29 | 487.1444 | 22433 | 85.0   | 13773  | 0.0217 |
| 30 | 488.1454 | 21838 | 13.7   | 2231   | 0.0224 |

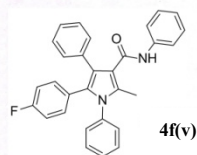

m/z: Calc'd for C<sub>20</sub>H<sub>23</sub>FN<sub>2</sub>NaO  
 ([M+Na]<sup>+</sup>): 469.1692, Found 469.1691.

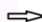

## Mass Spectrum List Report

|                      |                                |                   |                      |
|----------------------|--------------------------------|-------------------|----------------------|
| <b>Analysis Info</b> |                                | Acquisition Date  | 1/21/2013 3:12:14 PM |
| Analysis Name        | D:\Data\vipin\13-01-21-MCR-7.d | Operator          | VIKAS GROVER         |
| Method               | sodium formate tune_low.m      | Instrument / Ser# | maXis 40             |
| Sample Name          | MCR-7                          |                   |                      |
| Comment              |                                |                   |                      |

|                              |            |                       |           |                  |           |
|------------------------------|------------|-----------------------|-----------|------------------|-----------|
| <b>Acquisition Parameter</b> |            |                       |           |                  |           |
| Source Type                  | ESI        | Ion Polarity          | Positive  | Set Nebulizer    | 1.2 Bar   |
| Focus                        | Not active | Set Capillary         | 4500 V    | Set Dry Heater   | 180 °C    |
| Scan Begin                   | 50 m/z     | Set End Plate Offset  | -500 V    | Set Dry Gas      | 7.0 l/min |
| Scan End                     | 600 m/z    | Set Collision Cell RF | 300.0 Vpp | Set Divert Valve | Source    |

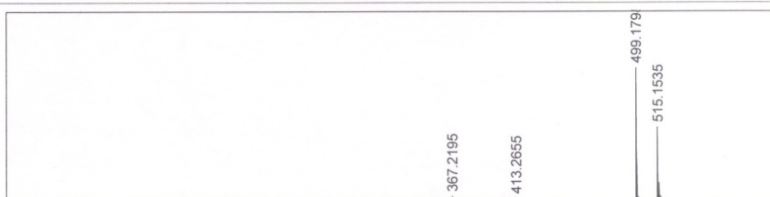

| #  | m/z      | Res.  | S/N    | I      | FWHM   |
|----|----------|-------|--------|--------|--------|
| 1  | 153.1379 | 21939 | 14.4   | 353    | 0.0070 |
| 2  | 178.8988 | 20602 | 18.5   | 312    | 0.0087 |
| 3  | 180.8957 | 23318 | 15.5   | 262    | 0.0078 |
| 4  | 196.8652 | 18173 | 16.1   | 281    | 0.0108 |
| 5  | 198.8623 | 20651 | 16.0   | 280    | 0.0096 |
| 6  | 236.8581 | 26909 | 13.2   | 287    | 0.0088 |
| 7  | 238.8541 | 22411 | 10.1   | 224    | 0.0107 |
| 8  | 254.8245 | 20419 | 14.0   | 331    | 0.0125 |
| 9  | 256.8200 | 26185 | 20.3   | 479    | 0.0098 |
| 10 | 331.2164 | 24857 | 15.3   | 361    | 0.0133 |
| 11 | 367.2195 | 25161 | 162.3  | 6335   | 0.0146 |
| 12 | 368.2227 | 24054 | 24.8   | 969    | 0.0153 |
| 13 | 383.1933 | 23073 | 26.7   | 1072   | 0.0166 |
| 14 | 405.1567 | 26595 | 28.9   | 1124   | 0.0152 |
| 15 | 413.2655 | 23615 | 115.6  | 4112   | 0.0175 |
| 16 | 414.2690 | 27269 | 28.6   | 1006   | 0.0152 |
| 17 | 421.1310 | 24982 | 22.3   | 720    | 0.0169 |
| 18 | 441.2968 | 24145 | 23.0   | 597    | 0.0183 |
| 19 | 443.1372 | 22910 | 22.1   | 576    | 0.0193 |
| 20 | 468.1367 | 27685 | 10.1   | 271    | 0.0169 |
| 21 | 469.1665 | 23818 | 18.6   | 498    | 0.0197 |
| 22 | 477.1959 | 25736 | 40.3   | 1406   | 0.0185 |
| 23 | 478.1983 | 22302 | 10.8   | 406    | 0.0214 |
| 24 | 499.1798 | 21328 | 1645.0 | 154374 | 0.0234 |
| 25 | 500.1825 | 24110 | 506.8  | 48924  | 0.0207 |
| 26 | 501.1849 | 24938 | 53.3   | 5289   | 0.0201 |
| 27 | 515.1535 | 22700 | 722.0  | 85990  | 0.0227 |
| 28 | 516.1560 | 23932 | 186.4  | 21786  | 0.0216 |
| 29 | 517.1544 | 21693 | 50.3   | 5770   | 0.0238 |
| 30 | 518.1556 | 21608 | 10.1   | 1137   | 0.0240 |

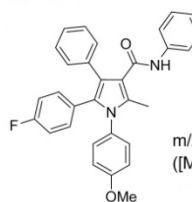

**4f(vi)**

m/z: Calc'd for  $C_{31}H_{25}FN_2NaO_2$   
 ([M+Na]<sup>+</sup>): 499.1798, found: 499.1798

## Mass Spectrum List Report

**Analysis Info**

Analysis Name D:\Data\vipin\13-01-21-MCR-8.d  
 Method sodium formate tune\_low.m  
 Sample Name MCR-8  
 Comment

Acquisition Date 1/21/2013 3:39:11 PM

Operator VIKAS GROVER  
 Instrument / Ser# maXis 40

**Acquisition Parameter**

|             |            |                       |           |                  |           |
|-------------|------------|-----------------------|-----------|------------------|-----------|
| Source Type | ESI        | Ion Polarity          | Positive  | Set Nebulizer    | 1.2 Bar   |
| Focus       | Not active | Set Capillary         | 4500 V    | Set Dry Heater   | 180 °C    |
| Scan Begin  | 50 m/z     | Set End Plate Offset  | -500 V    | Set Dry Gas      | 7.0 l/min |
| Scan End    | 600 m/z    | Set Collision Cell RF | 300.0 Vpp | Set Divert Valve | Source    |

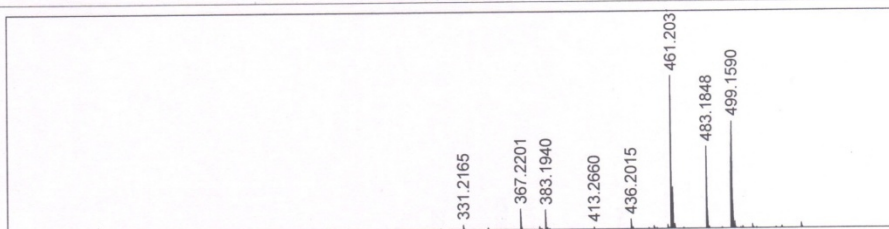

— +MS, 0.4min #25

| #  | m/z      | Res.  | S/N   | I     | FWHM   |
|----|----------|-------|-------|-------|--------|
| 1  | 200.1640 | 20608 | 10.5  | 228   | 0.0097 |
| 2  | 229.1132 | 22086 | 27.6  | 572   | 0.0104 |
| 3  | 245.1854 | 26903 | 16.0  | 324   | 0.0091 |
| 4  | 267.1673 | 23147 | 18.9  | 387   | 0.0115 |
| 5  | 277.0961 | 15537 | 11.9  | 247   | 0.0178 |
| 6  | 289.1756 | 19673 | 16.6  | 355   | 0.0147 |
| 7  | 317.1642 | 22139 | 15.3  | 437   | 0.0143 |
| 8  | 331.2165 | 23119 | 88.0  | 3253  | 0.0143 |
| 9  | 332.2200 | 23533 | 18.7  | 712   | 0.0141 |
| 10 | 347.2481 | 21159 | 23.4  | 1255  | 0.0164 |
| 11 | 367.2201 | 24049 | 179.1 | 12196 | 0.0153 |
| 12 | 368.2231 | 23283 | 26.2  | 1781  | 0.0158 |
| 13 | 379.1799 | 26183 | 32.5  | 2140  | 0.0145 |
| 14 | 383.1940 | 23941 | 179.8 | 11694 | 0.0160 |
| 15 | 384.1967 | 22961 | 24.6  | 1596  | 0.0167 |
| 16 | 385.1938 | 20942 | 10.7  | 691   | 0.0184 |
| 17 | 413.2660 | 22897 | 23.6  | 1338  | 0.0180 |
| 18 | 436.2015 | 25200 | 118.9 | 5682  | 0.0173 |
| 19 | 437.2050 | 22802 | 28.6  | 1376  | 0.0192 |
| 20 | 447.1852 | 23771 | 12.4  | 854   | 0.0188 |
| 21 | 450.2177 | 22778 | 23.3  | 1746  | 0.0198 |
| 22 | 459.1863 | 24141 | 26.6  | 2478  | 0.0190 |
| 23 | 461.2031 | 21724 | 925.2 | 90053 | 0.0212 |
| 24 | 462.2060 | 24320 | 247.2 | 24566 | 0.0190 |
| 25 | 463.2098 | 21469 | 27.2  | 2763  | 0.0216 |
| 26 | 483.1848 | 23000 | 381.2 | 48273 | 0.0210 |
| 27 | 484.1877 | 24257 | 92.9  | 11798 | 0.0200 |
| 28 | 485.1899 | 23992 | 11.3  | 1435  | 0.0202 |
| 29 | 499.1590 | 22486 | 479.0 | 62920 | 0.0222 |
| 30 | 500.1615 | 24461 | 122.9 | 16173 | 0.0204 |

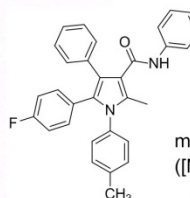

**4f(vii)**

m/z: Calc'd for C<sub>31</sub>H<sub>25</sub>FN<sub>2</sub>NaO  
 ([M+Na]<sup>+</sup>): 483.1849, found: 483.1848

-----
